# Supplementary material for: Interglacial and glacial variability from the last 800 ka in marine, ice and terrestrial archives
Source: Copernicus journal article supplement (doi:10.5194/cp-7-361-2011), 2011-04-21
Supplement: Supplementary file 2 [file cp-7-361-2011-supplement.xlsx]

## Sheet: Readme
Supplementary data to Lang and Wolff 2011 (Climate of the Past)
Data files used to construct Figure 2
Paper available at doi:10.5194/cp-7-361-2011
Paper also available at www.clim-past.net/7/361/2011
Original sources of data are fully described in the paper - please refer to this before any use, and refer to the original data as appropriate
Most data have been taken from the original data sources apart from alignment of marine age scales as described in the paper text
In a small number of cases, we were supplied by the data originators with updated or recalibrated datasets that differ slightly from those in the published sources we refer to; this applies in particular to MD90-0963 18O_p, and to Tenaghi Philippon arboreal pollen percentage data. The data in theis spreadsheet are these updated files used in our plots.
All oxygen and deuterium isotope data are in permil

## Sheet: Index
	δ18O					Other
	Benthic	Planktonic	SST	BWT
EDC ice core					δD	CO2	CH4
LR04 stack	x
DSDP 607			x
DSDP 607				x
ODP 646		x
ODP 677	x	x
ODP 722			x
ODP 806B		x	x
ODP 846	x		x
ODP 925	x
ODP 980	x
ODP 982	x	x	x
ODP 983	x
ODP 1020			x
ODP 1090	x	x	x
ODP 1123	x		x
ODP 1143	x
ODP 1146	x	x	x
MD90-0963		x
MD97-2140			x
Zhaojichuan/Lingtai					Loess MS	Loess MAR
Lake Baikal					Biogenic silica
Tenaghi Philippon					Arboreal pollen

## Sheet: EDC deuterium
EDC3 age (ka)	dD	1 ka averages		EDC3 age (ka)	dD	Temp vs present (C)
0.5	-397.016			0.0383738	-390.9	0.876244
1.5	-396.135			0.046812	-385.1	1.83615
2.5	-396.638			0.0550562	-377.8	3.04447
3.5	-396.061			0.0644151	-394.1	0.34555
4.5	-395.396			0.0731508	-398.7	-0.41628
5.5	-396.112			0.0819324	-395.9	0.0470499
6.5	-397.51			0.0907593	-395.9	0.0467915
7.5	-399.177			0.0999703	-399.3	-0.516392
8.5	-400.06			0.109889	-391.4	0.791263
9.5	-393.889			0.119259	-399.5	-0.550067
10.5	-391.804			0.129404	-402.9	-1.11326
11.5	-393.677			0.139939	-393.9	0.376498
12.5	-411.495			0.150102	-398.6	-0.40194
13.5	-412.278			0.16058	-389.8	1.05477
14.5	-408.533			0.171018	-394.5	0.276416
15.5	-418.239			0.181445	-400.5	-0.717164
16.5	-428.77			0.191483	-403.6	-1.23061
17.5	-439.509			0.201872	-393.1	0.507578
18.5	-441.552			0.212186	-410.9	-2.43964
19.5	-441.791			0.223163	-393.6	0.424362
20.5	-441.91			0.233739	-391.1	0.838049
21.5	-441.048			0.244641	-391.9	0.705378
22.5	-442.157			0.2555	-396.3	-0.0233136
23.5	-440.657			0.266612	-397	-0.139367
24.5	-443.555			0.277771	-404.7	-1.41433
25.5	-444.721			0.28925	-398.2	-0.338325
26.5	-444.5			0.301043	-395.2	0.158213
27.5	-439.67			0.312442	-403.5	-1.2161
28.5	-440.13			0.323855	-398.6	-0.405006
29.5	-438.091			0.335578	-399.7	-0.587284
30.5	-440.34			0.346881	-396	0.0251295
31.5	-441.074			0.358508	-400.2	-0.670389
32.5	-439.25			0.370901	-401.6	-0.902303
33.5	-437.625			0.382874	-405.4	-1.53156
34.5	-437.52			0.395186	-399	-0.472096
35.5	-435.24			0.407466	-396.9	-0.124525
36.5	-436.86			0.418755	-394.9	0.206493
37.5	-428.487			0.430398	-406.6	-1.73067
38.5	-427.841			0.442409	-395.2	0.156616
39.5	-436.055			0.454099	-395.3	0.139955
40.5	-437.395			0.466125	-399.5	-0.555573
41.5	-436.265			0.478214	-401	-0.804115
42.5	-435.495			0.490397	-393.6	0.420828
43.5	-433.395			0.503057	-410.4	-2.36079
44.5	-436.955			0.515651	-401.3	-0.854408
45.5	-426.359			0.528764	-398.3	-0.357941
46.5	-423.109			0.541609	-388.5	1.26434
47.5	-428.995			0.554931	-391.9	0.701227
48.5	-433.335			0.567754	-400.8	-0.772624
49.5	-433.405			0.5806	-387.7	1.39582
50.5	-430.448			0.593511	-401.4	-0.872734
51.5	-428.367			0.606474	-401	-0.806903
52.5	-425.7			0.619466	-387.3	1.46088
53.5	-422.83			0.632049	-390.2	0.98037
54.5	-428.119			0.644987	-394.5	0.268069
55.5	-431.045			0.658258	-401.9	-0.95747
56.5	-429.214			0.672128	-399.8	-0.610007
57.5	-424.577			0.686651	-399.9	-0.626703
58.5	-420.6			0.700679	-399.1	-0.494396
59.5	-423.759			0.715027	-401.9	-0.958101
60.5	-428.505			0.729278	-404.8	-1.43837
61.5	-432.074			0.744239	-401.6	-0.908724
62.5	-438.076			0.758743	-396.7	-0.0976344
63.5	-437.172			0.772407	-397.1	-0.164227
64.5	-439.671			0.785836	-394.2	0.315367
65.5	-441.569			0.798901	-395.9	0.0333928
66.5	-441.906			0.812307	-392.7	0.562653
67.5	-440.706			0.824811	-390.4	0.942942
68.5	-439.994			0.8371	-389	1.17424
69.5	-437.724			0.849379	-387	1.50487
70.5	-426.35			0.86197	-402.3	-1.02865
71.5	-428.163			0.875368	-392.5	0.593491
72.5	-435.3			0.889092	-404.6	-1.41002
73.5	-426.755			0.903166	-390.5	0.924076
74.5	-419.443			0.917332	-402.3	-1.02976
75.5	-429.4			0.931975	-400.1	-0.665811
76.5	-429.711			0.946982	-399.4	-0.550192
77.5	-428.368			0.961227	-400.6	-0.74913
78.5	-425.411			0.975765	-393.8	0.376292
79.5	-422.66			0.990158	-398.5	-0.402225
80.5	-420.162			1.00454	-398.7	-0.435739
81.5	-417.818			1.01879	-401.8	-0.949366
82.5	-412.096			1.03238	-395.2	0.14291
83.5	-409.7			1.04666	-390.1	0.986855
84.5	-414.835			1.06059	-393.9	0.35737
85.5	-418.785			1.0748	-400.6	-0.752252
86.5	-423.847			1.08908	-400.9	-0.802323
87.5	-430.229			1.10371	-391.7	0.720381
88.5	-426.467			1.11816	-399.3	-0.538253
89.5	-422.916			1.13265	-386.7	1.54733
90.5	-424.2			1.14679	-401.5	-0.903343
91.5	-424.456			1.16092	-398.1	-0.340902
92.5	-421.711			1.17439	-390.4	0.933286
93.5	-419.305			1.18811	-389.8	1.03202
94.5	-416.65			1.2015	-390.7	0.882425
95.5	-419.047			1.21504	-399.3	-0.541942
96.5	-418.495			1.22932	-392.5	0.583227
97.5	-417.94			1.2436	-393.8	0.367394
98.5	-418.179			1.25822	-394.4	0.267447
99.5	-419.711			1.27259	-397	-0.163577
100.5	-417.189			1.28698	-397.8	-0.296595
101.5	-416.065			1.30171	-388.6	1.22591
102.5	-420.856			1.31587	-394.7	0.215428
103.5	-428.96			1.33045	-390.6	0.893604
104.5	-423.029			1.34471	-397	-0.166532
105.5	-420.218			1.35862	-386.6	1.55464
106.5	-416.021			1.37262	-390.6	0.891889
107.5	-424.344			1.38662	-397	-0.168169
108.5	-432.614			1.40062	-396.1	-0.0196895
109.5	-427.586			1.41592	-398.9	-0.48379
110.5	-424.047			1.4319	-400.2	-0.69959
111.5	-424.194			1.44789	-398.7	-0.451839
112.5	-421.653			1.46327	-389.7	1.03759
113.5	-416.719			1.47874	-401.6	-0.932979
114.5	-410.511			1.49422	-397.9	-0.320941
115.5	-407.153			1.50968	-399.2	-0.536668
116.5	-403.563			1.52509	-397.6	-0.272292
117.5	-398.481			1.54051	-390.5	0.902615
118.5	-394.918			1.55634	-401.5	-0.918955
119.5	-392.452			1.57199	-395.7	0.0407979
120.5	-389.617			1.58802	-394.5	0.239014
121.5	-387.579			1.60408	-402.9	-1.15207
122.5	-386.428			1.62058	-401	-0.837993
123.5	-385.671			1.63711	-391.5	0.734257
124.5	-385.156			1.65401	-403.4	-1.23627
125.5	-388.858			1.67018	-393.4	0.418759
126.5	-386.525			1.68602	-393.8	0.352069
127.5	-379.767			1.70225	-400.8	-0.807253
128.5	-373.571			1.71977	-399.3	-0.559417
129.5	-373.672			1.73697	-396.6	-0.112917
130.5	-381.596			1.75417	-395.3	0.10182
131.5	-393.53			1.7706	-392.6	0.548358
132.5	-405.324			1.7874	-404.4	-1.40557
133.5	-413.787			1.80423	-394.4	0.249463
134.5	-422.977			1.82197	-402.2	-1.04229
135.5	-432.755			1.83934	-401.9	-0.993099
136.5	-437.17			1.8565	-393.8	0.347355
137.5	-435.22			1.87257	-402.3	-1.06045
138.5	-438.37			1.88899	-385.1	1.78631
139.5	-439.389			1.90546	-395.9	-0.00227615
140.5	-438.6			1.92201	-395.8	0.0136061
141.5	-437.28			1.93821	-398.2	-0.384381
142.5	-436.656			1.95551	-394.8	0.177809
143.5	-437.511			1.97276	-397.7	-0.302762
144.5	-435.3			1.99	-400.3	-0.733669
145.5	-437.711			2.00735	-402.4	-1.0818
146.5	-433.56			2.02524	-396	-0.0228024
147.5	-436.056			2.04351	-401.4	-0.917266
148.5	-433.64			2.06099	-386.1	1.61504
149.5	-432.17			2.0781	-400.1	-0.703225
150.5	-430.17			2.09522	-400.3	-0.736956
151.5	-431.99			2.11253	-393.2	0.437793
152.5	-432.32			2.12975	-399.7	-0.638878
153.5	-435.578			2.14734	-397.9	-0.341523
154.5	-438.911			2.16532	-402	-1.0209
155.5	-438.9			2.184	-398.7	-0.475256
156.5	-442.863			2.20229	-398.6	-0.459382
157.5	-439.4			2.21939		0.202135
158.5	-436.067			2.23656	-390.6	0.863662
159.5	-428.53			2.25339	-394	0.300164
160.5	-432.9			2.27087	-397.9	-0.34596
161.5	-432.744			2.28878	-394.8	0.166768
162.5	-427.14			2.30632	-408.2	-2.05196
163.5	-433.378			2.32661	-404.3	-1.40685
164.5	-439.325			2.3469	-399.6	-0.629305
165.5	-437.575			2.36662	-400.8	-0.828429
166.5	-436.778			2.38538	-401.5	-0.944737
167.5	-430.856			2.40454	-407.7	-1.97153
168.5	-427.76			2.4238	-400.5	-0.780056
169.5	-429.79			2.44308	-395.8	-0.00244535
170.5	-434.563			2.46251	-399.7	-0.648571
171.5	-430.033			2.48089	-399.6	-0.632781
172.5	-429.45			2.49965	-394.8	0.161049
173.5	-435.987			2.5178	-398.5	-0.45219
174.5	-435.044			2.53512	-390.2	0.921084
175.5	-437.6			2.5528	-396.4	-0.105971
176.5	-435.975			2.57084	-392.7	0.505694
177.5	-425.1			2.58902	-400.4	-0.76985
178.5	-427.311			2.6072	-393.5	0.371478
179.5	-437			2.62454	-390.6	0.850681
180.5	-437.825			2.6418	-395.2	0.0883455
181.5	-440.257			2.6591	-396.9	-0.19393
182.5	-440.062			2.67804	-399.1	-0.55897
183.5	-441.114			2.69661	-396.9	-0.195655
184.5	-440.212			2.71485	-401	-0.875214
185.5	-436.957			2.73272	-387.9	1.2925
186.5	-431.844			2.75024	-390.3	0.894389
187.5	-419.229			2.76745	-390.8	0.81066
188.5	-423.13			2.78428	-390.2	0.908843
189.5	-427.925			2.80145	-395.6	0.0138023
190.5	-432.375			2.81839	-387.7	1.32041
191.5	-428.262			2.8351	-388.9	1.12064
192.5	-422.822			2.85182	-388.9	1.11953
193.5	-429.374			2.86982	-395.4	0.0425555
194.5	-427.667			2.88801	-399.5	-0.636989
195.5	-420.963			2.90621	-401.7	-1.00202
196.5	-417.807			2.92422	-392.2	0.569706
197.5	-411.112			2.9429	-393.9	0.287419
198.5	-407.087			2.96121	-397.7	-0.342489
199.5	-405.591			2.98045	-401.1	-0.906093
200.5	-406.233			2.99969	-395.7	-0.0129943
201.5	-407.509			3.01871	-398.7	-0.510374
202.5	-416.81			3.03735	-395	0.101329
203.5	-420.978			3.05599	-394.7	0.150219
204.5	-417.612			3.07414	-395.8	-0.0327648
205.5	-413.339			3.09204	-391.8	0.6284
206.5	-411.612			3.11029		0.950208
207.5	-409.91			3.12851	-387.9	1.27202
208.5	-406.9			3.14672	-404.4	-1.46024
209.5	-404.325			3.16528	-401.1	-0.91494
210.5	-401.698			3.18572	-403.4	-1.2963
211.5	-403.243			3.20657	-391.8	0.623211
212.5	-404.882			3.22677	-400.5	-0.81756
213.5	-404.218			3.24686	-406.2	-1.76173
214.5	-403.619			3.26721	-392.7	0.472249
215.5	-401.334			3.28671	-400	-0.737
216.5	-409.37			3.30658	-401.9	-1.05238
217.5	-415.944			3.3259	-391.3	0.70136
218.5	-421.8			3.3455	-399.8	-0.70651
219.5	-423.504			3.36515	-404.2	-1.4357
220.5	-428.771			3.38511	-395.6	-0.0129734
221.5	-435.347			3.40546	-397.2	-0.278652
222.5	-438.583			3.42545	-398.2	-0.445
223.5	-440.1			3.44516	-396.6	-0.180957
224.5	-437.74			3.46487	-395.6	-0.0162254
225.5	-430.743			3.48379	-392.7	0.462746
226.5	-423.329			3.50307	-401.8	-1.04462
227.5	-431.985			3.52205	-387.3	1.35447
228.5	-438.583			3.54056	-394.6	0.145104
229.5	-428.75			3.55908	-397.2	-0.28629
230.5	-434.217			3.57833	-394.5	0.159528
231.5	-431.767			3.59829	-399.5	-0.669247
232.5	-427.186			3.61772	-389.9	0.91865
233.5	-423.986			3.63579	-390.8	0.768579
234.5	-420.429			3.65385	-394.4	0.171591
235.5	-414.938			3.672	-391.7	0.617361
236.5	-409.9			3.69065	-389.2	1.02989
237.5	-409.812			3.70895	-401.6	-1.02386
238.5	-407.483			3.7271	-387.2	1.35844
239.5	-405.553			3.7455	-387.8	1.25789
240.5	-399.13			3.76356	-404.9	-1.5738
241.5	-386.177			3.78299	-388.9	1.07353
242.5	-379.131			3.80225	-394.9	0.0793647
243.5	-386.646			3.8216	-393.8	0.2604
244.5	-402.622			3.84162	-399.6	-0.700692
245.5	-412.763			3.86127	-400.9	-0.91694
246.5	-426.125			3.88095	-391	0.720656
247.5	-425.58			3.90048	-396.1	-0.124576
248.5	-423.867			3.91972	-398.5	-0.522894
249.5	-428.85			3.9399	-396.5	-0.192941
250.5	-433.2			3.96007	-397.8	-0.409208
251.5	-433.983			3.97964	-392.9	0.400692
252.5	-436.2			3.99942	-398.7	-0.560519
253.5	-435.48			4.01916	-398.9	-0.594819
254.5	-433.633			4.03786	-390.6	0.777803
255.5	-436.062			4.05692	-390.4	0.809639
256.5	-431.9			4.07609	-402.3	-1.16131
257.5	-431.2			4.09543	-389.9	0.889826
258.5	-428.183			4.11476	-390.3	0.822336
259.5	-432.888			4.13401	-398.8	-0.585831
260.5	-434.36			4.15368	-397.8	-0.421587
261.5	-433.3			4.17332	-394.9	0.0571145
262.5	-432.58			4.19284	-392.2	0.502637
263.5	-426.15			4.21236	-404.7	-1.56768
264.5	-429.28			4.23144	-391.2	0.665407
265.5	-432.3			4.25031	-387.3	1.30957
266.5	-437.1			4.26917	-396.4	-0.197931
267.5	-438.56			4.28805	-387	1.35663
268.5	-438.025			4.30693	-398.1	-0.481851
269.5	-439.96			4.32636	-401.4	-1.02938
270.5	-440.78			4.34674	-395.2	-0.00459531
271.5	-442.725			4.36711	-393.4	0.291933
272.5	-443			4.38661	-394.9	0.042299
273.5	-442.5			4.40601	-397.1	-0.323187
274.5	-441.06			4.42551	-400.6	-0.903836
275.5	-439.4			4.44525	-393	0.352643
276.5	-440.2			4.46499	-387.1	1.32773
277.5	-438.575			4.48378	-397.5	-0.394938
278.5	-439.66			4.50265	-390.4	0.77878
279.5	-437.9			4.52139	-399.3	-0.695633
280.5	-429.21			4.54183	-397.5	-0.399249
281.5	-433.302			4.56226	-399.9	-0.797995
282.5	-429.483			4.58222	-395	0.0114898
283.5	-426.2			4.60193	-394.1	0.158993
284.5	-425.038			4.62199	-393.4	0.273413
285.5	-424.702			4.64161	-398.4	-0.555496
286.5	-421.37			4.66122	-395.1	-0.0107455
287.5	-420.303			4.68095	-396	-0.161111
288.5	-419.108			4.7011	-397.3	-0.377678
289.5	-417.912			4.72087	-389.3	0.944871
290.5	-414.933			4.74054	-399.6	-0.761212
291.5	-422.525			4.76021	-402.3	-1.20951
292.5	-426.94			4.78068	-396.7	-0.284146
293.5	-432.904			4.80108	-397.2	-0.368269
294.5	-433.337			4.82148	-402	-1.16401
295.5	-430.854			4.84229	-396.9	-0.321354
296.5	-424.388			4.86273	-390.9	0.670243
297.5	-434.318			4.88211	-393.4	0.254969
298.5	-431.7			4.9014	-395.9	-0.160389
299.5	-427.94			4.92033	-395.1	-0.029618
300.5	-423.808			4.93911	-392.7	0.365947
301.5	-432.334			4.95824	-389	0.97663
302.5	-427.94			4.97756	-397.9	-0.49784
303.5	-422.82			4.99741	-398.9	-0.664868
304.5	-421.47			5.01763	-396.8	-0.318894
305.5	-417.88			5.03728	-396.6	-0.287339
306.5	-424.4			5.05692	-392.7	0.356524
307.5	-432.42			5.07716	-400.6	-0.952399
308.5	-426.7			5.09724	-396.3	-0.242437
309.5	-426.256			5.11766	-395.6	-0.12819
310.5	-424.96			5.13666	-393.3	0.250934
311.5	-422.748			5.15601	-391.4	0.56387
312.5	-419.68			5.17482	-391.3	0.578945
313.5	-415.14			5.1934	-393.2	0.263056
314.5	-412.3			5.21232	-397.6	-0.466551
315.5	-410.92			5.23236	-395.8	-0.170278
316.5	-408.533			5.25308	-403.1	-1.37992
317.5	-415.183			5.27304	-396.3	-0.256293
318.5	-422.75			5.29275	-390.6	0.685259
319.5	-421.6			5.31211	-396	-0.210002
320.5	-417.22			5.33151	-390.6	0.681935
321.5	-411.75			5.35052	-396.3	-0.262935
322.5	-406.85			5.36994	-394.5	0.0333506
323.5	-402.767			5.38918	-391.4	0.544984
324.5	-398.543			5.40876	-407.6	-2.13706
325.5	-394.963			5.43022	-401.2	-1.07947
326.5	-394.557			5.45277	-402.4	-1.2795
327.5	-392.875			5.47411	-395	-0.0563362
328.5	-390.671			5.49514	-402.5	-1.29859
329.5	-393.212			5.51607	-407.9	-2.19337
330.5	-391.786			5.53856	-399.6	-0.821246
331.5	-392.613			5.56064	-394.6	0.00481819
332.5	-378.311			5.57952	-387.2	1.22768
333.5	-373.414			5.59793	-396.2	-0.263191
334.5	-375.438			5.61715	-394	0.0991714
335.5	-387.616			5.63684	-399.1	-0.746446
336.5	-401.208			5.6569	-395.2	-0.102863
337.5	-407.056			5.67668	-396	-0.236908
338.5	-416.56			5.69682	-400.4	-0.966595
339.5	-424.75			5.71683	-391.1	0.570615
340.5	-432.543			5.73629	-399.2	-0.771252
341.5	-441.72			5.75611	-386.2	1.3782
342.5	-442.02			5.77446	-398.9	-0.72497
343.5	-439.363			5.79303	-389	0.911286
344.5	-439.54			5.81142	-388.4	1.00871
345.5	-437.575			5.83055	-400.4	-0.978726
346.5	-437.5			5.84968	-392.7	0.293469
347.5	-434.967			5.8681	-391	0.573051
348.5	-434.7			5.88672	-392.5	0.323245
349.5	-431.233			5.90514	-397.7	-0.538763
350.5	-433			5.92583	-399.8	-0.888009
351.5	-433.925			5.94613	-398.7	-0.707823
352.5	-433.967			5.96727	-403.7	-1.53688
353.5	-432.75			5.98859	-397.4	-0.496239
354.5	-438.2			6.00873	-391.7	0.445153
355.5	-440.667			6.02792	-394.5	-0.0197494
356.5	-438.933			6.04711	-396.8	-0.401913
357.5	-440.6			6.06677	-399.2	-0.800718
358.5	-438.9			6.08693	-394	0.0579184
359.5	-437.8			6.10667	-391.4	0.486397
360.5	-436.167			6.12671	-403.5	-1.51724
361.5	-435.133			6.14675	-389.5	0.797385
362.5	-433.667			6.166	-399.9	-0.925047
363.5	-429.747			6.18556	-397.4	-0.513219
364.5	-435.867			6.20533	-398.6	-0.713574
365.5	-432.6			6.22492	-394.1	0.0290927
366.5	-433.967			6.24491	-398.4	-0.684179
367.5	-431.625			6.26525	-401.7	-1.23191
368.5	-436.133			6.28596	-392.6	0.271868
369.5	-431.767			6.30618	-395.4	-0.193122
370.5	-429.267			6.32578	-402.1	-1.30328
371.5	-427.425			6.34605	-403.6	-1.55312
372.5	-421.975			6.36722	-396.5	-0.38011
373.5	-425.833			6.38799	-402.5	-1.37439
374.5	-434.1			6.40905	-398.8	-0.763932
375.5	-433.833			6.43011	-397	-0.467828
376.5	-430.6			6.44944	-389.4	0.787785
377.5	-428.1			6.4683	-395	-0.140417
378.5	-427.767			6.48741	-404.9	-1.78003
379.5	-423.567			6.50878	-402.2	-1.33533
380.5	-419.85			6.53054	-389.2	0.813323
381.5	-416.102			6.55048	-397	-0.478833
382.5	-419.533			6.56966	-401.8	-1.27462
383.5	-424.4			6.59011	-398.4	-0.713915
384.5	-422.533			6.61198	-407.8	-2.27081
385.5	-418.075			6.63331	-395.4	-0.221363
386.5	-411.77			6.6544	-403.1	-1.4972
387.5	-419.967			6.67547	-406.1	-1.99554
388.5	-425.8			6.6951	-390.4	0.599664
389.5	-429.967			6.71493	-392.6	0.23379
390.5	-424.6			6.73495	-395.7	-0.280896
391.5	-421.775			6.75485	-402.9	-1.47376
392.5	-417.833			6.7752	-401.9	-1.31019
393.5	-412.5			6.79666	-401.2	-1.1964
394.5	-408.625			6.81773	-400.4	-1.06617
395.5	-404.16			6.83781	-397.5	-0.588757
396.5	-401.225			6.85756	-389.4	0.74873
397.5	-397.46			6.87675	-395.4	-0.24602
398.5	-398.02			6.89473	-387.9	0.992431
399.5	-395.32			6.91303	-398.3	-0.73002
400.5	-391.3			6.9332	-398.7	-0.798316
401.5	-389.04			6.95344	-401.3	-1.23052
402.5	-386.933			6.97375	-396.8	-0.488338
403.5	-385.2			6.99372	-395.6	-0.292003
404.5	-386.52			7.01338	-402.5	-1.43546
405.5	-384.133			7.03446	-399.5	-0.941351
406.5	-383.7			7.05552	-397.8	-0.662306
407.5	-382.5			7.07634	-400.5	-1.11104
408.5	-384.8			7.09672	-400.8	-1.16281
409.5	-383.45			7.11758	-396.1	-0.387521
410.5	-385.76			7.13855	-405.3	-1.91114
411.5	-387.8			7.15964	-411.9	-3.00474
412.5	-392.656			7.18304	-401.7	-1.31984
413.5	-392.475			7.20615	-399.3	-0.925073
414.5	-394.65			7.22769	-404.7	-1.82042
415.5	-393.475			7.24884	-403.1	-1.55802
416.5	-392.525			7.27031	-402.3	-1.428
417.5	-391.375			7.29178	-396.1	-0.404903
418.5	-394.838			7.31101	-388.3	0.88275
419.5	-395.5			7.3298	-398.5	-0.806526
420.5	-395.8			7.34921	-406.3	-2.09891
421.5	-400.5			7.37096	-399.9	-1.04311
422.5	-401.853			7.39233	-404.7	-1.83959
423.5	-405.362			7.41438	-403.8	-1.69325
424.5	-393.73			7.43641	-395	-0.240501
425.5	-397.715			7.45747	-402.8	-1.53284
426.5	-403.75			7.47794	-404.2	-1.76678
427.5	-412.267			7.49846	-399.1	-0.926027
428.5	-421.723			7.51873	-393.3	0.0302351
429.5	-428.55			7.53868	-399.1	-0.931671
430.5	-435.1			7.55728	-389.2	0.702731
431.5	-436.95			7.57622	-397.7	-0.705494
432.5	-437.3			7.59522	-388.4	0.829672
433.5	-437.56			7.61424	-400.3	-1.1407
434.5	-435.9			7.6335	-403.7	-1.70565
435.5	-436.25			7.65458	-398.3	-0.815726
436.5	-442.225			7.67559	-396.1	-0.455006
437.5	-442.585			7.69481	-390.7	0.434864
438.5	-440.3			7.71366	-404.7	-1.88291
439.5	-436.3			7.73328	-400.2	-1.14181
440.5	-436.55			7.75318	-388.5	0.789708
441.5	-434.05			7.77305	-390.4	0.472643
442.5	-434.9			7.79245	-405.5	-2.02664
443.5	-430.1			7.8122	-399.5	-1.03744
444.5	-431.4			7.83315	-402.1	-1.47026
445.5	-431			7.85424	-402.2	-1.48979
446.5	-430.6			7.87422	-395.2	-0.335506
447.5	-423			7.89362	-391.6	0.256655
448.5	-428			7.91312	-396.5	-0.556388
449.5	-429.25			7.93295	-399.5	-1.0553
450.5	-432.45			7.95277	-400.6	-1.24017
451.5	-425.9			7.97373	-401.6	-1.40838
452.5	-430.7			7.99479	-400.6	-1.24587
453.5	-426.58			8.01626	-406.3	-2.19096
454.5	-427.4			8.0379	-398.3	-0.871342
455.5	-430.3			8.06001	-411.7	-3.08929
456.5	-437.5			8.08252	-399.8	-1.1251
457.5	-438.4			8.1041	-396.9	-0.648588
458.5	-439.265			8.12448	-401.4	-1.39518
459.5	-437.3			8.14529	-405.3	-2.0426
460.5	-436.6			8.16822	-408.3	-2.54117
461.5	-433.75			8.19104	-406.5	-2.24638
462.5	-431.1			8.21311	-400.8	-1.30698
463.5	-432.82			8.23515	-403.2	-1.70639
464.5	-436.63			8.25595	-397.5	-0.767198
465.5	-438.3			8.27674	-401	-1.34854
466.5	-436.5			8.29771	-401.5	-1.43401
467.5	-437.75			8.31874	-400.4	-1.25503
468.5	-433.5			8.34	-400.3	-1.24132
469.5	-429.35			8.36142	-407.3	-2.40111
470.5	-422.75			8.38313	-403	-1.6934
471.5	-414.82			8.40527	-404.2	-1.89471
472.5	-418.8			8.42694	-401.2	-1.40198
473.5	-428.3			8.44756	-397.2	-0.744252
474.5	-430.34			8.46814	-396.9	-0.69797
475.5	-421.55			8.48825	-397.8	-0.849969
476.5	-415.45			8.50837	-409.5	-2.78674
477.5	-414.9			8.52888	-397.1	-0.741084
478.5	-422.85			8.54951	-390.3	0.379102
479.5	-422.2			8.56963	-397.5	-0.814061
480.5	-418.85			8.58932	-401.9	-1.54457
481.5	-418.31			8.60898	-392.4	0.0217069
482.5	-414.933			8.62854	-399.9	-1.22114
483.5	-412.6			8.64809	-399.3	-1.12563
484.5	-410.85			8.66817	-396.7	-0.699863
485.5	-410.667			8.68831	-402.1	-1.59594
486.5	-408.1			8.70886	-401.8	-1.55024
487.5	-405.467			8.7297	-397.5	-0.843672
488.5	-402.767			8.75014	-400.2	-1.29362
489.5	-403.6			8.76995	-395	-0.438355
490.5	-405.3			8.78986	-404.4	-1.99512
491.5	-408.567			8.81146	-402.1	-1.61916
492.5	-410			8.83303	-397.9	-0.929421
493.5	-410.667			8.85248	-393.4	-0.189995
494.5	-411.05			8.87172	-397.7	-0.90419
495.5	-411.567			8.89125	-397.4	-0.858533
496.5	-412.2			8.91099	-397.4	-0.862607
497.5	-412.05			8.93056	-399	-1.13093
498.5	-412.167			8.94963	-391.8	0.0543527
499.5	-413.05			8.9687	-392.7	-0.0984514
500.5	-414.967			8.98821	-401.1	-1.49006
501.5	-416.8			9.0078	-396.1	-0.668399
502.5	-415.1			9.02731	-397.7	-0.936847
503.5	-415.033			9.04676	-395.6	-0.594239
504.5	-414.1			9.0662	-398.6	-1.09393
505.5	-420.133			9.08563	-394.9	-0.486936
506.5	-417.85			9.10504	-394.9	-0.491124
507.5	-416.4			9.12603	-407.4	-2.5599
508.5	-422.767			9.14732	-403.4	-1.90393
509.5	-423.8			9.16761	-392.2	-0.0591944
510.5	-423.433			9.18744	-400.4	-1.41806
511.5	-424.75			9.20651	-391.1	0.112963
512.5	-423.233			9.22443	-388.5	0.537856
513.5	-421.833			9.24236	-394.8	-0.506706
514.5	-420.333			9.26183	-397.7	-0.990129
515.5	-416.6			9.28149	-401.2	-1.57271
516.5	-416.9			9.30067	-391.9	-0.0420247
517.5	-413.467			9.31949	-393.3	-0.277907
518.5	-412.6			9.3383	-394.3	-0.447628
519.5	-411.867			9.35703	-395	-0.56801
520.5	-412.227			9.37574	-392.4	-0.143617
521.5	-412.8			9.39396	-393.5	-0.329964
522.5	-417.267			9.412	-390	0.24304
523.5	-417.95			9.42985		0.36212
524.5	-418.867			9.44717	-388.5	0.481317
525.5	-418.233			9.46447	-394.3	-0.480618
526.5	-418.867			9.4836	-403.6	-2.02053
527.5	-419.05			9.50358	-393.3	-0.325537
528.5	-415.767			9.52307	-398	-1.10641
529.5	-419.833			9.54181	-391	0.0439751
530.5	-427.95			9.56053	-395.8	-0.752411
531.5	-432.85			9.57832	-386.4	0.794967
532.5	-435.1			9.5961	-391.8	-0.100197
533.5	-434.4			9.61436	-398.2	-1.16042
534.5	-431			9.63312	-391.6	-0.075361
535.5	-431.4			9.65177	-393.4	-0.376426
536.5	-430.15			9.66902	-384.4	1.10504
537.5	-429.34			9.68627	-391.3	-0.0373452
538.5	-435.2			9.7036	-391	0.00837843
539.5	-434.3			9.72103	-388.3	0.449949
540.5	-433.8			9.73843	-391.4	-0.0655373
541.5	-433.2			9.75505	-382.9	1.33326
542.5	-432			9.77161	-387.2	0.619907
543.5	-433			9.78895	-405.5	-2.4037
544.5	-436.28			9.80865	-391.7	-0.130428
545.5	-437.9			9.82834	-392.1	-0.200259
546.5	-436.7			9.84721	-400.4	-1.57346
547.5	-431.28			9.86601	-386.7	0.683332
548.5	-432.66			9.88424	-394.5	-0.607293
549.5	-428.59			9.90198	-389.9	0.147918
550.5	-422.685			9.91974	-394.7	-0.647832
551.5	-428.315			9.93854	-396.6	-0.96524
552.5	-430.04			9.95735	-388.6	0.350738
553.5	-423.91			9.97576	-392.9	-0.362569
554.5	-416.96			9.99396	-395.2	-0.745946
555.5	-409.73			10.012	-389.1	0.256472
556.5	-416.827			10.0293	-388.7	0.318557
557.5	-421.702			10.0467	-391.8	-0.19671
558.5	-427.947			10.0646	-388.8	0.294276
559.5	-429.023			10.0828	-397.7	-1.17805
560.5	-423.152			10.1007	-390.4	0.0220547
561.5	-418.65			10.1174	-382.1	1.3873
562.5	-414.35			10.1341	-387.9	0.426649
563.5	-410.84			10.1513	-390.6	-0.0226531
564.5	-405.817			10.1691	-393.3	-0.471934
565.5	-404.32			10.1868	-388.1	0.381879
566.5	-402.7			10.2047	-391.6	-0.19941
567.5	-401.217			10.2225	-396.9	-1.0776
568.5	-400.9			10.2407	-398.7	-1.37855
569.5	-400.1			10.2593	-386.6	0.613111
570.5	-400.6			10.2778	-390.7	-0.0672823
571.5	-400.55			10.2954	-391.2	-0.153766
572.5	-401.54			10.313	-389.5	0.122646
573.5	-402.075			10.3313	-400.9	-1.76151
574.5	-401.62			10.35	-388.6	0.263201
575.5	-401.74			10.3687	-397.9	-1.27454
576.5	-403.248			10.3876	-393	-0.470485
577.5	-403.603			10.4066	-394.4	-0.705509
578.5	-398.975			10.4257	-399.4	-1.53447
579.5	-397.475			10.4447	-388.2	0.308067
580.5	-404.817			10.4625	-386.8	0.534675
581.5	-413.733			10.4787	-383	1.15728
582.5	-423.873			10.495	-387.5	0.411187
583.5	-432.105			10.511	-390.1	-0.0217012
584.5	-425.4			10.527	-377.1	2.11775
585.5	-425.35			10.5431	-397.4	-1.23386
586.5	-429.8			10.5617	-390.6	-0.117169
587.5	-429.3			10.5803	-393.2	-0.550497
588.5	-420.35			10.5991	-395.2	-0.884824
589.5	-414.3			10.6179	-393.7	-0.641878
590.5	-416.515			10.6365	-392.9	-0.514235
591.5	-426.48			10.6545	-391.4	-0.271098
592.5	-423.18			10.6725	-384.5	0.86239
593.5	-420.695			10.6905	-394.4	-0.773918
594.5	-416.19			10.7085	-394.8	-0.843912
595.5	-421.325			10.7269	-395.8	-1.01294
596.5	-429.79			10.7462	-396.2	-1.08323
597.5	-431.51			10.7656	-395.4	-0.955718
598.5	-425.8			10.7841	-391.7	-0.35017
599.5	-423.3			10.8026	-390.9	-0.222706
600.5	-423.56			10.8206	-388	0.251052
601.5	-418.6			10.8383	-392.6	-0.511487
602.5	-418.965			10.8561	-397.7	-1.35637
603.5	-418.9			10.8754	-394.3	-0.800156
604.5	-416			10.8947	-391.4	-0.326379
605.5	-414.6			10.9129	-387.7	0.279403
606.5	-410.59			10.9308	-395.2	-0.960906
607.5	-407.85			10.9492	-400.3	-1.80566
608.5	-404.95			10.9689	-393.3	-0.656182
609.5	-400.8			10.9886	-390	-0.116591
610.5	-400.05			11.0062	-390.9	-0.268961
611.5	-400.5			11.0237	-387.4	0.30391
612.5	-401.3			11.0417	-389.7	-0.0792083
613.5	-398.05			11.0601	-398	-1.45125
614.5	-399.2			11.0785	-396.1	-1.14224
615.5	-397.7			11.0976	-392	-0.470763
616.5	-400.6			11.1167	-397.7	-1.41439
617.5	-403.7			11.1365	-398.9	-1.6165
618.5	-401.5			11.1565	-394.7	-0.928755
619.5	-399.1			11.1752	-386.8	0.368918
620.5	-400.3			11.1923	-385.8	0.529708
621.5	-400.8			11.2094	-387.9	0.179685
622.5	-402.9			11.2276	-390.7	-0.285805
623.5	-403.7			11.2459	-402	-2.15205
624.5	-402.9			11.2646	-392.6	-0.607332
625.5	-399.6			11.2835	-390.8	-0.315048
626.5	-408.9			11.3021	-394.6	-0.945428
627.5	-419			11.3189	-381	1.29146
628.5	-428.7			11.3358	-382.1	1.10615
629.5	-435.8			11.3536	-399.5	-1.76504
630.5	-437.8			11.3725	-393.5	-0.780788
631.5	-438.3			11.3915	-398.4	-1.59255
633.5	-434.9			11.411	-393.4	-0.773147
634.5	-439			11.4304	-390.9	-0.365658
635.5	-439.2			11.4481	-386.1	0.421005
637.5	-436.1			11.4653	-387.8	0.136839
638.5	-438			11.4825	-383.8	0.791823
639.5	-439.1			11.4993	-386.9	0.277018
641.5	-439.3			11.5162	-393	-0.732035
642.5	-435.5			11.5346	-396.6	-1.32946
643.5	-432.7			11.554	-394.1	-0.922123
645.5	-432.5			11.5734	-395.5	-1.15733
646.5	-432.7			11.5929	-395.4	-1.14524
647.5	-433.4			11.6124	-389.6	-0.194129
648.5	-431.2			11.6308	-394.8	-1.05485
649.5	-428.9			11.6491	-388.3	0.0117875
650.5	-431.3			11.6674	-394.8	-1.06305
651.5	-430.2			11.6855	-387.9	0.0693075
652.5	-432.9			11.7037	-396.1	-1.28567
653.5	-434.2			11.7227	-391.3	-0.499449
654.5	-432.2			11.7417	-393.6	-0.882733
655.5	-427.9			11.7604	-387.8	0.0683174
656.5	-427			11.779	-396.1	-1.30283
657.5	-431.2			11.7985	-403.2	-2.4764
658.5	-431.7			11.8199	-399.4	-1.85496
659.5	-435.65			11.8414	-400.8	-2.09
660.5	-438.4			11.8627	-399.4	-1.86355
661.5	-436.3			11.884	-400.9	-2.11471
662.5	-431.1			11.9053	-399.2	-1.83881
663.5	-433.5			11.9266	-404.9	-2.78161
664.5	-437.1			11.9494	-404	-2.63759
665.5	-440.65			11.9723	-398.2	-1.6866
666.5	-441			11.9934	-400	-1.98697
667.5	-440.7			12.0144	-399.8	-1.95792
668.5	-440.5			12.0367	-406.2	-3.01567
669.5	-434.2			12.0593	-403.5	-2.57488
670.5	-428.2			12.0825	-405.5	-2.90813
671.5	-433.15			12.1058	-414.8	-4.44347
672.5	-433.75			12.1309	-406.2	-3.03131
673.5	-432			12.1561	-405.8	-2.96923
674.5	-430.45			12.1806	-410.9	-3.81266
675.5	-424.2			12.2047	-403.7	-2.63086
676.5	-423.6			12.2272	-400.6	-2.12436
677.5	-426.335			12.2499	-409.6	-3.61003
678.5	-419.1			12.2734	-401.2	-2.23097
679.5	-421.65			12.2975	-413.3	-4.22709
680.5	-430.2			12.3237	-414.3	-4.39535
681.5	-429.25			12.3498	-408.8	-3.49362
682.5	-421.55			12.3759	-417.4	-4.91324
683.5	-421.9			12.4017	-406.8	-3.17202
684.5	-419.85			12.4274	-404.3	-2.76432
685.5	-417.007			12.4522	-412.4	-4.10148
686.5	-415.267			12.477	-412.6	-4.13815
687.5	-413.415			12.5032	-410.9	-3.86183
688.5	-411.753			12.5303	-420.8	-5.49503
689.5	-412			12.5594	-417.2	-4.90618
690.5	-409.44			12.5884	-418.8	-5.17321
691.5	-408.403			12.6173	-415.6	-4.65011
692.5	-406.713			12.6457	-418.6	-5.14735
693.5	-403.143			12.6734	-410.9	-3.88349
694.5	-405.217			12.7004	-413.7	-4.34793
695.5	-405			12.7273	-412.7	-4.18691
696.5	-405.003			12.7544	-419.3	-5.27675
697.5	-404.557			12.7841	-420.8	-5.5272
698.5	-405.433			12.8128	-412.1	-4.09897
699.5	-408.4			12.8406	-416	-4.7443
700.5	-408.133			12.8674	-408.8	-3.56306
701.5	-404.7			12.8941	-413.9	-4.40603
702.5	-407.1			12.9216	-416.4	-4.82113
703.5	-407.167			12.9496	-417.7	-5.0388
704.5	-410.4			12.9783	-414.9	-4.58182
705.5	-411.4			13.0054	-410.4	-3.84501
706.5	-413.5			13.0322	-411.6	-4.04611
707.5	-412.6			13.059	-415	-4.60916
708.5	-411.7			13.0866	-418.4	-5.17226
709.5	-414.2			13.1155	-415.5	-4.69888
710.5	-414.15			13.1433	-412.9	-4.27482
711.5	-413.8			13.1705	-408	-3.47225
712.5	-415.5			13.196	-410.8	-3.93641
713.5	-411.9			13.2219	-414.8	-4.59801
714.5	-412.95			13.2488	-408.7	-3.59808
715.5	-419.2			13.2748	-408.5	-3.56877
716.5	-418.75			13.3002	-411.8	-4.11524
717.5	-425.2			13.3267	-412.8	-4.28324
718.5	-426.6			13.3537	-419	-5.30663
719.5	-429.3			13.3832	-417.5	-5.06347
720.5	-433.05			13.412	-414	-4.49128
721.5	-441			13.4402	-416.6	-4.92251
722.5	-438.4			13.4678	-410.8	-3.97193
723.5	-431.5			13.4949	-403.4	-2.7581
724.5	-422.8			13.5199	-413.7	-4.45586
725.5	-419.3			13.5455	-410.2	-3.88377
726.5	-425.9			13.5724	-415.9	-4.82505
727.5	-425.55			13.6004	-416.8	-4.97674
728.5	-424.7			13.6292	-417.3	-5.06247
729.5	-424			13.6584	-417.1	-5.03307
730.5	-421.61			13.687	-411.9	-4.18123
731.5	-420.5			13.7146	-415.5	-4.7768
732.5	-415.8			13.7424	-413.4	-4.43488
733.5	-414.8			13.7702	-405	-3.05684
734.5	-414.25			13.7963	-417.2	-5.06685
735.5	-412.8			13.8224	-405.5	-3.14637
736.5	-414.85			13.8484	-414.3	-4.59725
737.5	-416.8			13.8754	-414.8	-4.68323
738.5	-421.55			13.9034	-412	-4.22653
739.5	-428.5			13.9297	-407.5	-3.4901
740.5	-436.95			13.9556	-403.4	-2.81938
741.5	-437.4			13.979	-402.3	-2.64214
742.5	-439.05			14.0024	-405.9	-3.23781
743.5	-440.95			14.0277	-410.4	-3.98164
744.5	-439.2			14.0533	-410.8	-4.0514
745.5	-437.85			14.0802	-413.4	-4.48273
746.5	-438.5			14.1062	-406	-3.26974
747.5	-438.3			14.1313	-402.6	-2.71435
748.5	-438.945			14.1556	-404.3	-2.99751
749.5	-437.45			14.1796	-406.9	-3.42867
750.5	-438.65			14.2045	-411.2	-4.13941
751.5	-438.9			14.2299	-392.2	-1.01938
752.5	-438.5			14.2517	-397.7	-1.92742
753.5	-437.275			14.2727	-399.1	-2.16144
754.5	-435.15			14.2949	-402.3	-2.6916
755.5	-432.8			14.3177	-401.1	-2.49846
756.5	-425.05			14.3409	-403.9	-2.96277
757.5	-421.32			14.3643	-401.2	-2.52259
758.5	-425.85			14.3901	-418.2	-5.32124
759.5	-431.15			14.4171	-408.8	-3.77982
760.5	-434.3			14.4419	-402.3	-2.71488
761.5	-433.05			14.4666	-411.1	-4.16504
762.5	-425.8			14.4934	-411.1	-4.16874
763.5	-421.05			14.5202	-407.3	-3.54775
764.5	-420.1			14.5465	-413.6	-4.58673
765.5	-423.6			14.5735	-411.2	-4.19563
766.5	-429.55			14.6012	-418.6	-5.41548
767.5	-427.8			14.6306	-415.7	-4.94218
768.5	-423.9			14.6599	-411.3	-4.22224
769.5	-417.1			14.6878	-416.2	-5.03086
770.5	-414.6			14.7158	-412.6	-4.44247
771.5	-414.85			14.7439	-407.6	-3.62415
772.5	-418.2			14.7703	-410.1	-4.03835
773.5	-414.615			14.7964	-411.6	-4.28811
774.5	-411.4			14.8231	-407.5	-3.61754
775.5	-408.2			14.8497	-409.9	-4.01526
776.5	-406.65			14.8762	-411.3	-4.24864
777.5	-406.6			14.9042	-419	-5.51754
778.5	-404.1			14.9334	-399.4	-2.29976
779.5	-403.4			14.9587	-413	-4.5381
780.5	-404.2			14.9842	-416.4	-5.1001
781.5	-404.2			15.0137	-416.3	-5.08693
782.5	-402.1			15.0422	-410	-4.05476
783.5	-400.9			15.0698	-410.7	-4.17291
784.5	-398.75			15.0974	-412.7	-4.50474
785.5	-396.3			15.1249	-411.8	-4.36003
786.5	-394.75			15.1529	-414.2	-4.75757
787.5	-396.25			15.1816	-416.6	-5.15506
788.5	-403.3			15.2113	-420	-5.71663
789.5	-405.8			15.2421	-418.5	-5.47307
790.5	-412.35			15.2732	-419.6	-5.65674
791.5	-418.6			15.3042	-418.7	-5.51163
792.5	-421.8			15.3354	-420.1	-5.74447
793.5	-425.3			15.3665	-419.8	-5.69798
794.5	-432			15.3974	-414	-4.74788
795.5	-437.3			15.4271	-416.2	-5.11221
796.5	-439			15.4566	-417.6	-5.34507
797.5	-440.2			15.4874	-421.6	-6.0051
798.5	-439			15.5183	-416.6	-5.18641
799.5	-441.1			15.5492	-423.8	-6.3723
				15.5812	-414.2	-4.79792
				15.612	-417.8	-5.39228
				15.6419	-416.9	-5.24716
				15.6725	-419.1	-5.61134
				15.7031	-417.3	-5.31833
				15.7337	-419.1	-5.61679
				15.7652	-420.3	-5.81654
				15.7971	-422.5	-6.18052
				15.8297	-417.7	-5.39453
				15.8617	-425.4	-6.66205
				15.8941	-420.8	-5.90885
				15.9271	-421.1	-5.96068
				15.9599	-424.1	-6.45589
				15.9939	-426.8	-6.90185
				16.0286	-425.9	-6.75639
				16.0633	-420.9	-5.93742
				16.0962	-421.9	-6.10402
				16.1288	-421.7	-6.07348
				16.1616	-422.6	-6.22363
				16.196	-429.8	-7.40876
				16.2309	-423.9	-6.44196
				16.2658	-421.9	-6.11573
				16.2992	-425.8	-6.75853
				16.3339	-426	-6.79351
				16.369	-425.7	-6.74634
				16.4041	-426.4	-6.86339
				16.4403	-434.2	-8.1464
				16.4782	-427.5	-7.0477
				16.5158	-429.9	-7.44376
				16.5526	-428.1	-7.14998
				16.5891	-426.1	-6.82335
				16.6263	-438.3	-8.82888
				16.6654	-429.4	-7.36869
				16.7051	-434.5	-8.2079
				16.7444	-433.9	-8.11078
				16.7845	-434.6	-8.22723
				16.8252	-439.3	-9.00053
				16.8674	-431.6	-7.73725
				16.9071	-432	-7.80435
				16.9465	-435.5	-8.38045
				16.986	-429.4	-7.37981
				17.0246	-437.2	-8.66203
				17.0662	-429.5	-7.39857
				17.1055	-441.5	-9.37038
				17.1481	-436.2	-8.50092
				17.1905	-435.6	-8.40326
				17.2326	-439.9	-9.11023
				17.2752	-435.5	-8.38837
				17.3177	-439.7	-9.07879
				17.3614	-442.5	-9.53928
				17.4072	-442.1	-9.47393
				17.4529	-442.1	-9.4742
				17.4987	-443.5	-9.70432
				17.5452	-433.9	-8.12793
				17.5864	-439	-8.96596
				17.6302	-443.7	-9.73836
				17.6757	-438.6	-8.90122
				17.7199	-438.4	-8.86877
				17.764	-442.5	-9.54244
				17.8098	-444.2	-9.82189
				17.8567	-443.1	-9.64143
				17.9032	-440.5	-9.21461
				17.9485	-440.7	-9.24775
				17.9932	-438.8	-8.93614
				18.0375	-440.3	-9.18283
				18.0822	-441.9	-9.44587
				18.128	-441.7	-9.41308
				18.1738	-441.4	-9.36372
				18.2195	-442.3	-9.51138
				18.2657	-441.6	-9.3962
				18.3118	-447.4	-10.3484
				18.3615	-437.2	-8.67299
				18.4048	-440.8	-9.26391
				18.4493	-436.5	-8.55773
				18.4934	-444.8	-9.92077
				18.5397	-440.5	-9.21448
				18.586	-442.9	-9.60839
				18.6322	-441.4	-9.36183
				18.6779	-439.3	-9.01677
				18.7234	-443.4	-9.68992
				18.769	-438.2	-8.83581
				18.815	-446	-10.1165
				18.862	-441.3	-9.3443
				18.9078	-435.8	-8.44069
				18.9526	-447.9	-10.4274
				19.0012	-444.6	-9.88511
				19.0488	-436.3	-8.52169
				19.0931	-442.5	-9.53945
				19.1392	-441.3	-9.34191
				19.1849	-432	-7.81411
				19.2257	-442.6	-9.55467
				19.2719	-438.7	-8.91395
				19.3172	-445.1	-9.9645
				19.3647	-440.2	-9.15914
				19.4111	-443.8	-9.74979
				19.4584	-443	-9.61781
				19.5064	-446.5	-10.192
				19.5552	-441.5	-9.37006
				19.6029	-446.5	-10.1905
				19.652	-444.9	-9.92702
				19.7002	-438.9	-8.94109
				19.7456	-438.3	-8.84217
				19.7895	-436.4	-8.5298
				19.8339	-442.4	-9.51495
				19.8809	-448	-10.4343
				19.9305	-444.2	-9.80952
				19.9792	-441.7	-9.39843
				20.0259	-439.5	-9.03688
				20.072	-442.1	-9.46369
				20.1177	-437.5	-8.70785
				20.1634	-444.1	-9.79145
				20.2103	-440.6	-9.21609
				20.2571	-442.5	-9.52761
				20.3044	-443.5	-9.69128
				20.3524	-443.7	-9.72356
				20.401	-446.5	-10.1826
				20.4502	-438.8	-8.91715
				20.496	-438.3	-8.8346
				20.5407	-441.2	-9.31047
				20.5872	-442.3	-9.49057
				20.6346	-443.3	-9.65428
				20.6827	-443.2	-9.63718
				20.7307	-439.5	-9.02865
				20.7764	-441.5	-9.35648
				20.8232	-441.8	-9.40513
				20.8704	-442.2	-9.47011
				20.9178	-441.7	-9.38721
				20.9655	-446.3	-10.1419
				21.0149	-440.9	-9.2541
				21.0623	-442.5	-9.51639
				21.1092	-437.8	-8.74382
				21.1546	-439.7	-9.05514
				21.2011	-445.6	-10.0235
				21.2503	-445.7	-10.0391
				21.2996	-440.6	-9.20042
				21.3463	-436.9	-8.59206
				21.3902	-432.8	-7.91822
				21.4346	-446.1	-10.1024
				21.4823	-443.7	-9.70745
				21.5307	-438.8	-8.90171
				21.5777	-443.3	-9.63997
				21.626	-446.2	-10.1154
				21.6758	-442.9	-9.57241
				21.7241	-439.2	-8.96388
				21.7702	-437.7	-8.71718
				21.8149	-436.2	-8.47047
				21.8592	-442	-9.42294
				21.9065	-440.3	-9.14338
				21.9532	-443.1	-9.60278
				22.0018	-442.2	-9.45433
				22.0498	-444.4	-9.81504
				22.0995	-445.4	-9.97861
				22.1498	-443.5	-9.66555
				22.1988	-438.3	-8.81033
				22.2445	-445.8	-10.0416
				22.2951	-445	-9.90928
				22.3452	-435.6	-8.3643
				22.3892	-440.3	-9.1356
				22.4358	-442	-9.41408
				22.4833	-437.9	-8.73973
				22.5293	-440.8	-9.21533
				22.5768	-445.1	-9.9209
				22.6257	-439.5	-8.99995
				22.6738	-445.5	-9.98458
				22.723	-441.7	-9.35917
				22.7718	-443.3	-9.62082
				22.8205	-441.9	-9.3896
				22.8693	-444	-9.73326
				22.9185	-442.9	-9.5512
				22.9672	-440.2	-9.10641
				23.0139	-436.1	-8.43187
				23.0593	-438.6	-8.84192
				23.1041	-434.9	-8.23343
				23.1489	-439.5	-8.98865
				23.1949	-440.7	-9.18513
				23.2419	-438.3	-8.78996
				23.289	-447.2	-10.2514
				23.3397	-441.8	-9.36295
				23.3884	-439.3	-8.95103
				23.4355	-441.3	-9.27875
				23.483	-437.7	-8.68648
				23.5288	-438.9	-8.8831
				23.5752	-439.9	-9.04681
				23.6221	-437.4	-8.63537
				23.6678	-439.3	-8.94692
				23.7145	-441.4	-9.29129
				23.7625	-441.8	-9.35627
				23.8119	-448.1	-10.3903
				23.8641	-445.4	-9.94535
				23.9155	-443.4	-9.61541
				23.9654	-442.8	-9.51554
				24.0154	-449.3	-10.5822
				24.0692	-443.8	-9.67691
				24.1195	-442.1	-9.39648
				24.1684	-440	-9.05042
				24.2159	-439.7	-9.00027
				24.2635	-444.3	-9.7553
				24.3136	-441.7	-9.32694
				24.3629	-446.2	-10.0652
				24.4147	-446.4	-10.0966
				24.4668	-433.5	-7.97529
				24.5108	-439.7	-8.99328
				24.5582	-445.2	-9.89635
				24.6093	-447.1	-10.2073
				24.662	-446.2	-10.0577
				24.7144	-445.6	-9.95744
				24.7663	-445.2	-9.88999
				24.8178	-443.1	-9.54333
				24.8679	-444.9	-9.83769
				24.9191	-442.2	-9.39255
				24.9688	-444.9	-9.83486
				25.0202	-445.6	-9.94834
				25.072	-444.9	-9.83171
				25.1233	-442	-9.35363
				25.1729	-442	-9.3522
				25.2228	-447.2	-10.2053
				25.2759	-448.9	-10.4832
				25.3302	-447.9	-10.3169
				25.3835	-443.2	-9.54262
				25.4351	-445.2	-9.86966
				25.4866	-445	-9.83519
				25.5382	-444	-9.66926
				25.5892	-443.2	-9.53634
				25.6396	-441.8	-9.30488
				25.6902	-447.2	-10.1909
				25.7426	-446.2	-10.025
				25.7951	-443.2	-9.53012
				25.847	-448.9	-10.4651
				25.8999	-439.6	-8.9347
				25.9496	-443.7	-9.6069
				26.0004	-447.3	-10.1969
				26.0531	-439.9	-8.97881
				26.1026	-445.2	-9.84832
				26.1543	-445.9	-9.96163
				26.2067	-441.1	-9.17083
				26.2566	-448.6	-10.4019
				26.3111	-445.9	-9.95607
				26.3637	-440.2	-9.01706
				26.4126	-445.8	-9.93593
				26.4651	-442.2	-9.34244
				26.5155	-443.7	-9.58734
				26.5668	-446	-9.96379
				26.6198	-447.4	-10.192
				26.6739	-446.9	-10.1078
				26.7267	-440.5	-9.05373
				26.777	-443.1	-9.47935
				26.8277	-444.6	-9.72423
				26.88	-447.1	-10.1335
				26.933	-443.8	-9.58913
				26.9853	-444.8	-9.75164
				27.0374	-444.5	-9.70043
				27.0898	-445.9	-9.92879
				27.1419	-441.6	-9.22012
				27.1922	-439	-8.7912
				27.2401	-435.9	-8.28038
				27.2873	-439.3	-8.83838
				27.3328	-427.6	-6.91399
				27.3772	-441.8	-9.24789
				27.4253	-440.5	-9.033
				27.4745	-438.4	-8.6865
				27.5234	-449.5	-10.51
				27.5778	-441.2	-9.14367
				27.6277	-433.4	-7.85998
				27.673	-432.5	-7.71089
				27.7171	-438	-8.6144
				27.7646	-440	-8.94237
				27.8138	-442.8	-9.4015
				27.8641	-436.6	-8.38059
				27.9116	-439.2	-8.80672
				27.9607	-445.7	-9.87419
				28.0135	-447.8	-10.2178
				28.068	-441.3	-9.14686
				28.1187	-443	-9.42461
				28.1702	-446.1	-9.93265
				28.2238	-443	-9.421
				28.2754	-438.7	-8.71206
				28.3237	-439.8	-8.89159
				28.3726	-435.6	-8.19955
				28.4188	-433.4	-7.8366
				28.4645	-438.6	-8.6907
				28.512	-438.1	-8.60738
				28.56	-438	-8.58975
				28.6083	-439.7	-8.86803
				28.6579	-443.3	-9.45864
				28.7087	-441.4	-9.14462
				28.7593	-440	-8.91273
				28.8095	-442.2	-9.27296
				28.8591	-436.6	-8.35051
				28.9078	-439.8	-8.8754
				28.956	-436.2	-8.28204
				29.0039	-438.9	-8.72485
				29.0518	-436.1	-8.26316
				29.0989	-435.1	-8.09753
				29.1452	-435.9	-8.22806
				29.1918	-430.8	-7.38822
				29.2358	-438.2	-8.60447
				29.2828	-431.8	-7.55098
				29.328	-434.1	-7.92829
				29.3748	-443.2	-9.42393
				29.4246	-439.9	-8.8798
				29.4744	-437.1	-8.4177
				29.5225	-436.7	-8.35049
				29.5701	-437.1	-8.41504
				29.6177	-436.6	-8.33167
				29.6647	-433.5	-7.82074
				29.7108	-436.8	-8.36253
				29.7583	-440.1	-8.90411
				29.8084	-445.7	-9.82397
				29.8622	-443.4	-9.44368
				29.9148	-443	-9.37593
				29.9674	-445.9	-9.8511
				30.0204	-437.1	-8.40165
				30.0708	-447	-10.0285
				30.1243	-442.3	-9.2536
				30.1767	-441.9	-9.18607
				30.2274	-436.6	-8.31248
				30.2773	-446.5	-9.93945
				30.3297	-438.4	-8.60524
				30.3803	-441.2	-9.06433
				30.4311	-442	-9.19444
				30.4826	-442	-9.19287
				30.5344	-442.6	-9.29001
				30.5861	-440.1	-8.87703
				30.6368	-440.1	-8.87533
				30.6872	-440.1	-8.87391
				30.7376	-440.1	-8.87258
				30.7879	-440.1	-8.87131
				30.8373	-432.2	-7.57034
				30.8837	-439	-8.68821
				30.9329	-439.5	-8.76969
				30.9828	-438	-8.52186
				31.0319	-444	-9.50788
				31.0855	-446.6	-9.93389
				31.1407	-442.7	-9.29042
				31.1937	-443.8	-9.46979
				31.2474	-447.3	-10.044
				31.3026	-443.5	-9.41713
				31.356	-440.4	-8.90554
				31.4075	-441.4	-9.06884
				31.4589	-440.4	-8.90304
				31.511	-446.3	-9.87244
				31.5644	-440.5	-8.91677
				31.6181	-449.3	-10.3632
				31.6732	-442.2	-9.1936
				31.725	-431.9	-7.49758
				31.7729	-436.8	-8.30275
				31.821	-440.3	-8.87786
				31.871	-438	-8.49867
				31.9193	-429.3	-7.06657
				31.9648	-435.7	-8.11909
				32.0115	-428.3	-6.90116
				32.0553	-437.4	-8.39806
				32.1039	-438.9	-8.644
				32.1536	-436.9	-8.31396
				32.2029	-439.9	-8.80661
				32.2529	-436.2	-8.19676
				32.3018	-437.3	-8.37681
				32.35	-433.7	-7.78356
				32.3985	-441.2	-9.01679
				32.4478	-434.7	-7.94633
				32.4964	-435.6	-8.09356
				32.5453	-442.1	-9.16219
				32.5976	-445.8	-9.76982
				32.6522	-443.9	-9.45546
				32.7066	-443	-9.30565
				32.7609	-446.5	-9.87984
				32.8159	-442.6	-9.23635
				32.8692	-438.7	-8.59293
				32.9208	-442.7	-9.24972
				32.9729	-439.6	-8.73832
				33.0239	-436.2	-8.17777
				33.0728	-435.3	-8.02875
				33.1208	-434.7	-7.92927
				33.168	-432.3	-7.5337
				33.2149	-435.5	-8.05967
				33.2621	-433.7	-7.76286
				33.3091	-432	-7.48249
				33.3553	-437	-8.30466
				33.4043	-435.5	-8.05718
				33.4526	-438	-8.46779
				33.5024	-436	-8.13778
				33.5511	-435.9	-8.12047
				33.5993	-433.5	-7.72462
				33.648	-443.2	-9.3198
				33.6992	-435.8	-8.10078
				33.7496	-439.9	-8.77426
				33.8013	-444.5	-9.52992
				33.8556	-444.5	-9.52824
				33.9108	-444.5	-9.52636
				33.9661	-444.5	-9.52444
				34.0213	-444.5	-9.52251
				34.0765	-442.3	-9.15863
				34.13	-438.5	-8.53153
				34.1808	-442.1	-9.12264
				34.2341	-441.2	-8.97313
				34.287	-444.9	-9.58044
				34.3424	-441.9	-9.08499
				34.3954	-436.5	-8.19495
				34.4452	-435.5	-8.02915
				34.4939	-438.7	-8.55482
				34.5447	-431.6	-7.38527
				34.5911	-437.4	-8.33909
				34.6404	-433.8	-7.74582
				34.6881	-433.4	-7.6792
				34.7362	-438.3	-8.48484
				34.7848	-431.4	-7.3484
				34.832	-431.7	-7.39704
				34.8791	-437.6	-8.36734
				34.9279	-435.6	-8.03728
				34.9768	-433.5	-7.69077
				35.024	-429.5	-7.03173
				35.0694	-433.5	-7.68938
				35.1167	-437.9	-8.41262
				35.167	-433.7	-7.72039
				35.2144	-429.9	-7.09424
				35.2602	-432.5	-7.52156
				35.3073	-436.5	-8.17916
				35.3563	-436.9	-8.24407
				35.4059	-435.8	-8.06209
				35.4539	-428.2	-6.81027
				35.5009	-438.6	-8.52115
				35.5505	-439.5	-8.6681
				35.6016	-434.3	-7.81097
				35.6503	-433.1	-7.61243
				35.6979	-434.8	-7.89125
				35.7464	-439.6	-8.68012
				35.7984	-436.6	-8.18497
				35.8484	-443	-9.23685
				35.9029	-435.3	-7.96763
				35.952	-435.6	-8.01574
				36.0012	-436	-8.08038
				36.0507	-435.8	-8.04618
				36.1008	-442	-9.06549
				36.1538	-439.7	-8.68529
				36.2063	-438.8	-8.53545
				36.2578	-437.5	-8.31998
				36.3083	-434.6	-7.84135
				36.3572	-434.6	-7.84031
				36.4061	-436.1	-8.08639
				36.4556	-436.8	-8.20075
				36.5056	-435.9	-8.05163
				36.555	-434.2	-7.77079
				36.6045	-438.3	-8.4448
				36.6547	-436.1	-8.08168
				36.7047	-435.3	-7.94901
				36.7548	-439.6	-8.65591
				36.8066	-440.7	-8.83578
				36.8594	-438.9	-8.53816
				36.9113	-436.7	-8.17477
				36.9609	-429.6	-7.00495
				37.0071	-427.3	-6.62604
				37.0514	-435.1	-7.90995
				37.1004	-434.9	-7.87647
				37.1495	-435	-7.89228
				37.1975	-427.3	-6.62406
				37.2437	-434.4	-7.79246
				37.29	-428.6	-6.83709
				37.3371	-435.1	-7.90671
				37.384	-428.6	-6.83607
				37.4308	-436.5	-8.13619
				37.4795	-428.7	-6.85151
				37.5251	-430.7	-7.18049
				37.5707	-423.8	-6.04416
				37.6133	-424.6	-6.17589
				37.6557	-425.2	-6.27494
				37.6974	-418.3	-5.13922
				37.7371	-426	-6.4074
				37.7793	-418.8	-5.22245
				37.8186	-415.4	-4.66315
				37.8577	-424.5	-6.16199
				37.8989	-430.6	-7.16694
				37.9451	-431	-7.23257
				37.9921	-434.8	-7.85786
				38.0389	-423.4	-5.98083
				38.082	-420.5	-5.50343
				38.1241	-430.4	-7.13346
				38.1688	-431.1	-7.24861
				38.2154	-433.4	-7.62718
				38.2631	-422.5	-5.83241
				38.3062	-431.3	-7.28119
				38.3506	-425.3	-6.29329
				38.395	-427	-6.57322
				38.4391	-429.8	-7.03424
				38.4844	-427.3	-6.6226
				38.5288	-425.9	-6.39219
				38.5723	-426	-6.40889
				38.6157	-425.6	-6.34327
				38.6595	-428.5	-6.82085
				38.7044	-430.7	-7.18301
				38.7508	-432.8	-7.52872
				38.7984	-424.4	-6.14555
				38.8416	-428.9	-6.88637
				38.8863	-427.1	-6.58997
				38.9307	-426.3	-6.45824
				38.976	-434.3	-7.77536
				39.0228	-428.8	-6.8695
				39.0685	-423.2	-5.94724
				39.1112	-436	-8.05463
				39.1612	-434	-7.72514
				39.2105	-436.9	-8.20202
				39.2613	-436	-8.05306
				39.3118	-435.5	-7.96986
				39.3622	-436.9	-8.19949
				39.4129	-435.5	-7.96813
				39.4633	-435.9	-8.03317
				39.5148	-441.9	-9.01995
				39.569	-443	-9.19962
				39.6248	-442.4	-9.09932
				39.6798	-436.8	-8.17572
				39.7323	-443.3	-9.24467
				39.7872	-434.7	-7.82725
				39.8379	-438.7	-8.48488
				39.8897	-434.2	-7.74299
				39.9398	-436.5	-8.12094
				39.9897	-430.9	-7.1981
				40.0386	-437.3	-8.25122
				40.0885	-434.2	-7.74009
				40.1383	-433.3	-7.59115
				40.1884	-439.6	-8.62771
				40.2405	-439	-8.52797
				40.2935	-438.3	-8.41165
				40.3447	-430.9	-7.19233
				40.3935	-433	-7.53753
				40.4414	-431.3	-7.25694
				40.4904	-439.1	-8.5406
				40.5426	-441.2	-8.88558
				40.5969	-440.2	-8.71955
				40.6511	-440.1	-8.70165
				40.7052	-440.8	-8.81552
				40.7592	-438.4	-8.41904
				40.812	-436.7	-8.13786
				40.8651	-444.3	-9.38797
				40.9197	-436.8	-8.15154
				40.9724	-436	-8.01858
				41.0232	-434.5	-7.77057
				41.073	-433.3	-7.57193
				41.1233	-439.4	-8.57542
				41.1742	-431.7	-7.30655
				41.2226	-426.5	-6.44962
				41.2685	-433.2	-7.5522
				41.3166	-433.4	-7.58434
				41.3657	-434.9	-7.83054
				41.4159	-439.4	-8.57034
				41.4693	-427.8	-6.65872
				41.5156	-441	-8.83133
				41.5692	-434.7	-7.79269
				41.62	-440.4	-8.72995
				41.6738	-435.7	-7.95439
				41.7249	-437.3	-8.21634
				41.7772	-441.9	-8.97244
				41.8325	-438.2	-8.36148
				41.8854	-440.9	-8.80445
				41.9402	-440.5	-8.73675
				41.9948	-440.6	-8.75144
				42.0497	-442.5	-9.06249
				42.1058	-442.4	-9.04415
				42.1612	-437.4	-8.21895
				42.2148	-441.5	-8.89257
				42.2682	-433.2	-7.52432
				42.3193	-437.2	-8.18176
				42.3709	-438.3	-8.36167
				42.4228	-433.3	-7.53709
				42.4728	-433.4	-7.55272
				42.5222	-434.7	-7.76593
				42.5727	-438.9	-8.45654
				42.6248	-430.8	-7.12142
				42.6736	-439.3	-8.52035
				42.7265	-433.8	-7.61349
				42.7766	-435.8	-7.94183
				42.8275	-432.6	-7.41373
				42.8762	-428.6	-6.75434
				42.9225	-430.5	-7.06673
				42.9695	-430.2	-7.01678
				43.0168	-431.3	-7.19739
				43.0638	-427.8	-6.62043
				43.1101	-429.1	-6.83409
				43.1569	-433.2	-7.50887
				43.2049	-429.1	-6.83292
				43.2524	-436.4	-8.03454
				43.3034	-435.8	-7.93457
				43.354	-426.9	-6.46757
				43.3995	-429.7	-6.92819
				43.4465	-432.3	-7.35588
				43.4953	-435.6	-7.8985
				43.5461	-436.6	-8.06212
				43.5971	-432.4	-7.36925
				43.6467	-433.6	-7.56577
				43.6963	-435.1	-7.8117
				43.7461	-431.5	-7.21759
				43.7962	-438.8	-8.4187
				43.8487	-440.4	-8.68079
				43.9022	-436.4	-8.0205
				43.9536	-435.9	-7.93679
				44.0049	-440.8	-8.74252
				44.0584	-440.3	-8.65871
				44.1124	-438.2	-8.31131
				44.166	-441.3	-8.82037
				44.2207	-441	-8.76926
				44.276	-439	-8.43811
				44.33	-436.6	-8.04137
				44.3819	-430.5	-7.03528
				44.431	-434.1	-7.62721
				44.4818	-440.8	-8.72984
				44.535	-438.2	-8.3003
				44.588	-439.2	-8.46364
				44.641	-435.8	-7.90232
				44.6922	-433.8	-7.57171
				44.7427	-435.9	-7.91658
				44.7938	-435.2	-7.80025
				44.8448	-435.1	-7.78277
				44.8955	-433.8	-7.56763
				44.9458	-434.3	-7.64904
				44.9961	-434.9	-7.74696
				45.0462	-431.4	-7.16962
				45.095	-431.1	-7.11955
				45.1425	-428.1	-6.62483
				45.1894	-430.6	-7.03634
				45.2367	-430.4	-7.00302
				45.2842	-429.9	-6.92016
				45.3314	-427.9	-6.5902
				45.3773	-429.1	-6.78758
				45.4237	-427.4	-6.50726
				45.4699	-430.2	-6.96824
				45.5168	-429.8	-6.90205
				45.5622	-419.9	-5.27093
				45.6064	-430.7	-7.05004
				45.6518	-425.5	-6.19336
				45.6967	-428.5	-6.68755
				45.7424	-420.9	-5.43553
				45.7848	-424.4	-6.01237
				45.827	-420.4	-5.35375
				45.8698	-426	-6.27672
				45.9124	-413.7	-4.25101
				45.951	-419.1	-5.14111
				45.9919	-424.5	-6.03104
				46.0356	-429.5	-6.85503
				46.0804	-423.1	-5.801
				46.124	-419.7	-5.24121
				46.1652	-426.6	-6.37831
				46.2098	-426.2	-6.31265
				46.2538	-425	-6.11511
				46.2978	-425.4	-6.18119
				46.3415	-422.5	-5.70367
				46.3844	-422.6	-5.72043
				46.4266	-417.3	-4.84806
				46.4658	-415.6	-4.56871
				46.5038	-412.3	-4.02585
				46.5418	-422.1	-5.6413
				46.5831	-421.3	-5.51051
				46.6243	-418.5	-5.04993
				46.6656	-422.3	-5.67662
				46.7068	-419.7	-5.24886
				46.7484	-427.8	-6.58369
				46.7938	-427.2	-6.48526
				46.8396	-429.5	-6.86434
				46.8854	-423.5	-5.87592
				46.9301	-426.9	-6.43619
				46.9748	-426.9	-6.43635
				47.0199	-425.3	-6.17288
				47.0647	-428.8	-6.74962
				47.111	-429.1	-6.79916
				47.1577	-425.7	-6.23909
				47.2026	-426.9	-6.43688
				47.2462	-418	-4.97085
				47.2893	-428.3	-6.66829
				47.3336	-428.1	-6.63572
				47.3802	-431.2	-7.14653
				47.4279	-427.8	-6.58643
				47.4743	-430.1	-6.96539
				47.5218	-428.7	-6.73474
				47.5687	-430.3	-6.99844
				47.6164	-431.5	-7.19636
				47.6639	-425.7	-6.24106
				47.7096	-425.9	-6.27423
				47.7553	-431.1	-7.1311
				47.8033	-434.3	-7.65847
				47.8524	-428.2	-6.65364
				47.9003	-431.8	-7.24679
				47.9499	-442.1	-8.94372
				48.0049	-435.9	-7.92165
				48.058	-436.5	-8.02
				48.111	-439.7	-8.54675
				48.1649	-436	-7.93674
				48.2171	-432.2	-7.3104
				48.2678	-436.3	-7.98565
				48.3182	-429.1	-6.79948
				48.3665	-428.1	-6.63483
				48.4137	-429.1	-6.79996
				48.461	-432.2	-7.31105
				48.5101	-430.3	-6.9982
				48.5584	-439.5	-8.51399
				48.6131	-433.7	-7.55812
				48.6637	-429.9	-6.93166
				48.7118	-438.3	-8.31526
				48.7656	-437.4	-8.16663
				48.819	-430.8	-7.07899
				48.8674	-430.4	-7.01283
				48.9153	-427.5	-6.53515
				48.9624	-433.8	-7.5732
				49.0123	-434.4	-7.67195
				49.0633	-433.9	-7.58929
				49.1146	-437.4	-8.16546
				49.1668	-432	-7.27537
				49.2176	-436.7	-8.04923
				49.2695	-434.2	-7.63693
				49.3215	-438.8	-8.39421
				49.3747	-432.5	-7.35573
				49.4258	-436.2	-7.96483
				49.4772	-431.3	-7.1572
				49.5263	-428.8	-6.74511
				49.5746	-433.6	-7.53575
				49.6243	-433.1	-7.45328
				49.673	-424.9	-6.10231
				49.7208	-434.6	-7.70016
				49.7702	-434.4	-7.66701
				49.8201	-426.1	-6.29952
				49.8687	-434.4	-7.66679
				49.9184	-433.3	-7.48535
				49.9698	-437.5	-8.17676
				50.0216	-430.7	-7.05607
				50.0709	-428.2	-6.64408
				50.1183	-430.1	-6.95696
				50.1659	-427.3	-6.49573
				50.2123	-430.5	-7.02296
				50.2608	-433.6	-7.53347
				50.3114	-433.4	-7.50026
				50.3619	-430.7	-7.05512
				50.4106	-430.7	-7.05478
				50.4581	-422.1	-5.63798
				50.5033	-431.4	-7.17024
				50.5511	-433	-7.43371
				50.6019	-437.1	-8.10878
				50.6525	-425.8	-6.24679
				50.7006	-430.5	-7.02079
				50.7487	-433.3	-7.4818
				50.7977	-427.9	-6.59191
				50.8463	-433.4	-7.49777
				50.8958	-432.6	-7.36566
				50.9454	-428.5	-6.68991
				50.9931	-428.6	-6.70631
				51.0408	-435.5	-7.84302
				51.0923	-432.7	-7.38121
				51.1428	-432.7	-7.38068
				51.1929	-431.7	-7.21557
				51.2423	-430.1	-6.95164
				51.2907	-430.5	-7.01739
				51.3392	-429	-6.77012
				51.387	-431.7	-7.21485
				51.4357	-428	-6.6052
				51.4828	-426.9	-6.42408
				51.5285	-424.2	-5.97953
				51.5748	-432.9	-7.41313
				51.6225	-427.8	-6.573
				51.6709	-432.5	-7.34749
				51.7189	-425	-6.11199
				51.7652	-428.2	-6.63939
				51.8113	-421.2	-5.48666
				51.8544	-429.2	-6.80525
				51.9014	-425.9	-6.26208
				51.9468	-424.1	-5.96602
				51.9897	-415.9	-4.61571
				52.0321	-426.5	-6.36306
				52.0749	-419.7	-5.24368
				52.1174	-425.7	-6.23301
				52.1628	-432	-7.27182
				52.2117	-426.2	-6.31671
				52.2583	-429.5	-6.86078
				52.3052	-426.2	-6.31756
				52.3519	-428.8	-6.7464
				52.3981	-424.7	-6.07139
				52.443	-422.2	-5.66014
				52.4876	-430.6	-7.04478
				52.5345	-424.1	-5.97448
				52.5795	-426.4	-6.35407
				52.6249	-419.9	-5.28401
				52.668	-428.6	-6.71822
				52.7134	-424.9	-6.10954
				52.7571	-415.8	-4.6112
				52.7993	-424.9	-6.11138
				52.8426	-425.3	-6.1782
				52.8877	-428	-6.62401
				52.9346	-429.2	-6.82233
				52.9822	-426.2	-6.32864
				53.0262	-413.6	-4.25376
				53.0675	-422.7	-5.75422
				53.1095	-425.3	-6.18372
				53.1533	-418.6	-5.08102
				53.1949	-420.6	-5.41164
				53.2366	-418.3	-5.034
				53.2776	-419.2	-5.18361
				53.3184	-417.8	-4.95433
				53.3589	-417.6	-4.92286
				53.3991	-418	-4.99026
				53.4397	-419.8	-5.28817
				53.482	-425.2	-6.17917
				53.5262	-425.9	-6.2957
				53.5715	-424.6	-6.08241
				53.6173	-431.3	-7.18713
				53.6657	-429.4	-6.87459
				53.7139	-428.1	-6.66096
				53.7609	-421.3	-5.54168
				53.804	-425.6	-6.25108
				53.8484	-421.3	-5.54364
				53.8927	-427.2	-6.51671
				53.9378	-425.6	-6.25406
				53.984	-428.1	-6.66677
				54.0306	-427.1	-6.50282
				54.0776	-430	-6.98128
				54.125	-422	-5.66392
				54.1689	-423.8	-5.96155
				54.213	-423	-5.83084
				54.2564	-420.5	-5.42003
				54.3007	-430.3	-7.03567
				54.3475	-429.5	-6.90482
				54.3959	-429.2	-6.85602
				54.4446	-432.5	-7.40023
				54.4946	-432.5	-7.40056
				54.5445	-428.8	-6.79136
				54.5938	-433.8	-7.61548
				54.6448	-435.5	-7.89595
				54.6969	-432.3	-7.36907
				54.748	-432.4	-7.38592
				54.797	-423.6	-5.93681
				54.8432	-427.6	-6.59646
				54.8897	-428.6	-6.76212
				54.9371	-424.8	-6.13702
				54.9823	-422.7	-5.79219
				55.0268	-429.6	-6.93008
				55.0744	-428.9	-6.8158
				55.1216	-424.2	-6.04243
				55.1682	-430.3	-7.04829
				55.2158	-429.1	-6.85155
				55.2636	-426	-6.3418
				55.3104	-427.5	-6.58984
				55.3584	-434.9	-7.80981
				55.4087	-428.7	-6.78907
				55.4576	-428.6	-6.77326
				55.5055	-428.8	-6.80711
				55.5536	-431.1	-7.18693
				55.6032	-432.2	-7.3688
				55.654	-435.5	-7.9131
				55.7072	-438	-8.32516
				55.7613	-431.9	-7.32051
				55.8126	-432.1	-7.35395
				55.8638	-436.8	-8.12866
				55.9177	-438.3	-8.37597
				55.9713	-428.4	-6.74534
				56.0228	-440.1	-8.67305
				56.0762	-432.2	-7.37203
				56.1283	-431.7	-7.29007
				56.1778	-427	-6.51633
				56.2259	-429.2	-6.87948
				56.2752	-436.5	-8.08269
				56.3264	-427.7	-6.63358
				56.3757	-429.9	-6.99652
				56.4244	-430.5	-7.09602
				56.4738	-431.2	-7.21196
				56.5232	-427.7	-6.63608
				56.5709	-426.6	-6.45554
				56.6181	-433.6	-7.60927
				56.6689	-427	-6.5228
				56.7165	-431	-7.18248
				56.7661	-426	-6.35958
				56.8123	-424.6	-6.12997
				56.8579	-427.2	-6.55931
				56.9035	-419.7	-5.32498
				56.9482	-428.8	-6.82514
				56.994	-425.3	-6.24977
				57.0405	-426	-6.36619
				57.086	-422.1	-5.72499
				57.1298	-418.9	-5.19946
				57.1716	-423.7	-5.9917
				57.2157	-417.5	-4.97215
				57.2576	-421.9	-5.69863
				57.3001	-421.2	-5.58487
				57.3457	-434.6	-7.79351
				57.3946	-427.7	-6.65836
				57.4427	-423.5	-5.96779
				57.4878	-422.2	-5.75489
				57.5319	-426.3	-6.43175
				57.5782	-427.4	-6.61454
				57.6253	-422.6	-5.82559
				57.669	-419	-5.23424
				57.7128	-429.4	-6.94886
				57.7601	-430.7	-7.16457
				57.8093	-428.6	-6.82023
				57.8572	-425	-6.2287
				57.9036	-424.8	-6.19724
				57.9489	-423.4	-5.96837
				57.9939	-424.2	-6.10186
				58.0386	-419	-5.24734
				58.081	-427	-6.56686
				58.1268	-419.2	-5.28413
				58.1702	-423.4	-5.97776
				58.2122	-413.9	-4.41507
				58.2542	-423.7	-6.03131
				58.2966	-417.6	-5.02882
				58.3381	-416.9	-4.91575
				58.3792	-422.6	-5.85675
				58.4224	-421.4	-5.66116
				58.4668	-426	-6.42063
				58.5105	-416.3	-4.82508
				58.5522	-414.9	-4.59679
				58.5916	-418.5	-5.19187
				58.6332	-420	-5.44111
				58.6757	-421.2	-5.64093
				58.7178	-416.6	-4.88548
				58.76	-422.9	-5.92506
				58.8032	-422.1	-5.79542
				58.8472	-423.8	-6.07734
				58.8921	-422	-5.78288
				58.9361	-422.7	-5.90003
				58.9802	-422.1	-5.80306
				59.0241	-421.5	-5.70615
				59.0674	-419.7	-5.4117
				59.11	-419.4	-5.36425
				59.1527	-429.8	-7.07863
				59.2015	-414.3	-4.52803
				59.2416	-424.2	-6.16023
				59.2861	-424.8	-6.26113
				59.3329	-431.1	-7.30049
				59.3809	-423.8	-6.09998
				59.4259	-416	-4.81721
				59.4689	-424.9	-6.28469
				59.5135	-426.5	-6.55014
				59.5602	-424.3	-6.18959
				59.6059	-422.2	-5.8455
				59.6505	-430.1	-7.14789
				59.6997	-428.6	-6.90245
				59.7475	-419	-5.32336
				59.7911	-422.5	-5.90134
				59.8349	-422.6	-5.91952
				59.879	-421.4	-5.72375
				59.9245	-430.8	-7.27338
				59.9724	-425.2	-6.35272
				60.0199	-427.8	-6.78215
				60.0677	-427.1	-6.66812
				60.1158	-430.6	-7.24565
				60.1658	-431.1	-7.32887
				60.2163	-428.6	-6.91811
				60.2653	-427	-6.65574
				60.3132	-432	-7.48008
				60.3644	-428.9	-6.97046
				60.4136	-424.5	-6.24668
				60.4597	-430.6	-7.25196
				60.5098	-427.4	-6.72619
				60.5577	-423.4	-6.06884
				60.6029	-421.7	-5.79015
				60.6485	-430.4	-7.22369
				60.697	-428.5	-6.91196
				60.7466	-430.5	-7.24234
				60.7969	-432.2	-7.52314
				60.8475	-427.1	-6.68443
				60.896	-425.7	-6.45499
				60.9439	-429.8	-7.1311
				60.9938	-433.7	-7.7743
				61.0445	-425.5	-6.42532
				61.0936	-429.8	-7.13434
				61.1425	-428.1	-6.85551
				61.1918	-429.5	-7.08712
				61.2416	-430.9	-7.31871
				61.2922	-431.3	-7.38555
				61.3429	-429	-7.00783
				61.3941	-435.7	-8.11175
				61.447	-432.6	-7.60228
				61.4992	-428.7	-6.96106
				61.5498	-431.6	-7.43941
				61.6011	-433.6	-7.76965
				61.6537	-432.1	-7.52364
				61.7057	-430.5	-7.26108
				61.757	-432.7	-7.62409
				61.8093	-433.6	-7.77308
				61.8629	-437.2	-8.36633
				61.9188	-436.3	-8.21862
				61.9745	-440.7	-8.94316
				62.0333	-436	-8.16954
				62.089	-434.6	-7.93941
				62.1436	-435.3	-8.05499
				62.1984	-436.1	-8.18708
				62.2542	-438.6	-8.59889
				62.3117	-440.2	-8.86226
				62.3706	-438.4	-8.5658
				62.428	-430.4	-7.24858
				62.4798	-440.5	-8.91121
				62.5387	-440.4	-8.89486
				62.5982	-440.1	-8.84504
				62.6571	-438.2	-8.53189
				62.7147	-436.4	-8.23533
				62.7713	-442.1	-9.17321
				62.8322	-443.9	-9.469
				62.8941	-438.6	-8.59589
				62.9528	-437.5	-8.41418
				63.012	-448.3	-10.1912
				63.0791	-442.7	-9.26821
				63.1411	-442.4	-9.21766
				63.2029	-443.6	-9.41424
				63.265	-440.8	-8.95242
				63.3257	-442.9	-9.29716
				63.3875	-441.4	-9.0492
				63.4482	-440.1	-8.8342
				63.5076	-438	-8.48775
				63.5639	-427	-6.67679
				63.615	-427.9	-6.82491
				63.6657	-437.1	-8.33916
				63.7197	-426.7	-6.62731
				63.7709	-440.3	-8.86549
				63.8289	-434.3	-7.87736
				63.8836	-434.2	-7.86029
				63.9377	-429.7	-7.11898
				63.9891	-431.7	-7.44775
				64.0423	-438.3	-8.53367
				64.1001	-441.6	-9.07564
				64.1599	-437.4	-8.38304
				64.2184	-439.8	-8.77652
				64.2778	-443.1	-9.31794
				64.3399	-439.4	-8.70702
				64.3989	-436.6	-8.24453
				64.4568	-440.1	-8.81902
				64.5163	-441.9	-9.11358
				64.5772	-437.6	-8.40418
				64.6354	-442.7	-9.24213
				64.6968	-437	-8.30227
				64.756	-443.3	-9.33766
				64.8174	-441.3	-9.00664
				64.8789	-440.2	-8.82374
				64.9391	-440.6	-8.88783
				64.9984	-433.5	-7.71772
				65.0539	-433.5	-7.71642
				65.1108	-446	-9.77265
				65.1731	-437.4	-8.35558
				65.2321	-441.5	-9.02893
				65.2931	-439.3	-8.66526
				65.3533	-442.2	-9.14106
				65.4153	-443.9	-9.41918
				65.4786	-440.1	-8.79194
				65.5394	-444.8	-9.56388
				65.6028	-438.1	-8.45918
				65.6631	-441.4	-9.00074
				65.7243	-443.6	-9.36133
				65.7878	-445	-9.58995
				65.8521	-440.1	-8.78147
				65.9139	-443.2	-9.2901
				65.9769	-445	-9.58453
				66.0419	-444.4	-9.48347
				66.1063	-442.5	-9.16842
				66.1701	-446.4	-9.80809
				66.2362	-442.7	-9.19653
				66.2992	-442.2	-9.11184
				66.3615	-440.5	-8.82976
				66.423	-441.8	-9.04165
				66.4848	-434.6	-7.85465
				66.5414	-445.9	-9.71307
				66.606	-439.6	-8.67357
				66.6671	-438.3	-8.45717
				66.727	-442.9	-9.21228
				66.7899	-443	-9.22646
				66.8527	-438.6	-8.49968
				66.9134	-441.7	-9.00753
				66.9756	-445.4	-9.61393
				67.0409	-440.6	-8.82085
				67.1031	-444.1	-9.39428
				67.1671	-443.3	-9.25978
				67.2314	-444.4	-9.43771
				67.296	-440.9	-8.85842
				67.3581	-441.2	-8.90481
				67.4206	-444.2	-9.39572
				67.4849	-440.5	-8.78362
				67.5458	-434.6	-7.80949
				67.6037	-442.5	-9.10751
				67.6658	-442.6	-9.1213
				67.7294	-443.8	-9.31582
				67.793	-430.5	-7.12377
				67.8478	-441.1	-8.86658
				67.9084	-439.5	-8.60063
				67.9689	-437.5	-8.26878
				68.0286	-442.3	-9.05639
				68.0915	-445.8	-9.62957
				68.1581	-445.1	-9.51102
				68.2242	-443.9	-9.31008
				68.2894	-434.7	-7.7927
				68.3459	-436.2	-8.0376
				68.4034	-435.5	-7.92062
				68.4602	-433.5	-7.58954
				68.5165	-436.9	-8.14753
				68.5739	-434.6	-7.76708
				68.6311	-439.7	-8.60486
				68.6915	-436.9	-8.14191
				68.7512	-444.7	-9.42399
				68.8156	-441.9	-8.96032
				68.8793	-441.7	-8.92478
				68.9427	-446.5	-9.71252
				69.0095	-441.3	-8.85355
				69.074	-446.3	-9.67397
				69.1409	-440.7	-8.7492
				69.2037	-443.6	-9.22421
				69.2681	-442.2	-8.99128
				69.332	-441.6	-8.89003
				69.3944	-431.7	-7.25825
				69.4504	-439.2	-8.4914
				69.5106	-441.1	-8.8024
				69.5725	-438.3	-8.33967
				69.6322	-429.6	-6.90556
				69.6857	-433.7	-7.57911
				69.7415	-431.8	-7.265
				69.7963	-435.9	-7.93849
				69.8542	-436.7	-8.06854
				69.9126	-433.2	-7.49038
				69.9692	-434.4	-7.68609
				70.0254	-432.3	-7.33864
				70.0808	-434.6	-7.71561
				70.1372	-429	-6.79204
				70.1896	-428.2	-6.65916
				70.2413	-433.6	-7.5471
				70.2964	-425.9	-6.27823
				70.3472	-428.4	-6.68862
				70.3986	-427.9	-6.60529
				70.4499	-426.7	-6.40673
				70.4995	-419.4	-5.20438
				70.5459	-424.5	-6.04347
				70.594	-421.9	-5.61495
				70.641	-422	-5.63094
				70.6878	-418.5	-5.05449
				70.7326	-421.2	-5.49881
				70.7787	-421.4	-5.53146
				70.8256	-424.1	-5.97545
				70.8731	-420.7	-5.4148
				70.9221	-434.7	-7.71857
				70.9764	-432	-7.27248
				71.0302	-419.7	-5.24554
				71.0784	-430.9	-7.08797
				71.1305	-426.8	-6.41145
				71.1815	-425.6	-6.2124
				71.2313	-424.4	-6.01333
				71.2804	-424.6	-6.04476
				71.3301	-430.7	-7.04753
				71.3834	-431.6	-7.19368
				71.438	-429.1	-6.77968
				71.4907	-429.7	-6.87622
				71.5435	-423.5	-5.85304
				71.5924	-428.7	-6.70734
				71.6446	-429.5	-6.83715
				71.6975	-428.4	-6.6538
				71.7501	-430.5	-6.99735
				71.8036	-429.9	-6.8962
				71.8568	-428.1	-6.59748
				71.9097	-431.1	-7.08936
				71.9639	-432.3	-7.28476
				72.0188	-430.2	-6.93635
				72.0741	-437	-8.05336
				72.1321	-430.9	-7.04575
				72.1872	-434.2	-7.58623
				72.2442	-432.5	-7.30318
				72.3009	-438.2	-8.23851
				72.3629	-442.2	-8.89369
				72.4261	-436.2	-7.90154
				72.4863	-437.7	-8.14486
				72.5469	-438.8	-8.32241
				72.6083	-438	-8.18696
				72.6687	-434.8	-7.65638
				72.7273	-434.5	-7.60369
				72.785	-434.7	-7.63344
				72.8429	-433.4	-7.41621
				72.8995	-431.9	-7.16624
				72.9556	-434.9	-7.65758
				73.012	-428.4	-6.58432
				73.0661	-430.3	-6.89485
				73.1194	-428	-6.5138
				73.172	-427.6	-6.44572
				73.2251	-434.3	-7.54706
				73.2805	-425.9	-6.16096
				73.3327	-431.6	-7.09747
				73.3873	-427.7	-6.45251
				73.4395	-433.4	-7.38903
				73.4955	-422.1	-5.52519
				73.5446	-430.5	-6.90679
				73.5981	-426.4	-6.22909
				73.6496	-426.4	-6.22684
				73.7006	-425.7	-6.1096
				73.7516	-428.8	-6.61842
				73.8037	-425.3	-6.03983
				73.8544	-424.9	-5.97206
				73.9028	-414.2	-4.20809
				73.9473	-421.4	-5.39318
				73.994	-422.2	-5.52379
				74.0419	-422.4	-5.55553
				74.0899	-418	-4.82948
				74.1352	-423.3	-5.7016
				74.1828	-416.1	-4.51422
				74.2276	-419.4	-5.05682
				74.2739	-424.3	-5.86298
				74.3215	-418.6	-4.92257
				74.3682	-420	-5.15208
				74.4141	-418.9	-4.96974
				74.4593	-415.9	-4.47445
				74.5025	-410.1	-3.51825
				74.5434	-416.9	-4.63816
				74.5872	-413.5	-4.07723
				74.6296	-415.7	-4.439
				74.6739	-422.7	-5.59148
				74.7208	-420.9	-5.29366
				74.7683	-420.7	-5.25931
				74.8159	-423.5	-5.71913
				74.864	-421.2	-5.33845
[truncated: 3,787 more rows]

## Sheet: EDC CO2
EDC3-gas-a age (ka)	CO2 / ppmv
0.137177	280.4
0.26824	274.9
0.279098	277.9
0.395449	279.1
0.40445	281.9
0.484918	277.7
0.559084	281.1
0.672286	282.2
0.7544	280.1
0.876843	278.4
0.950102	276.6
1.06042	279.1
1.15325	277.7
1.23255	278.7
1.34982	277.4
1.45256	279.2
1.55191	280
1.63751	278.9
1.73251	278.7
1.81241	278
1.9306	276.9
2.05747	276.7
2.12784	276.7
2.21187	277.6
2.33359	277.9
2.43285	273.9
2.5356	278.9
2.60412	275.3
2.6896	284.697
2.72818	274.7
2.80559	276.3
2.90246	274.6
3.05325	276.3
3.11602	273.1
3.21471	274
3.3364	275
3.45282	273.4
3.5232	273
3.62219	271.5
3.7214	275.4
3.7898	274.9
3.8971	272.743
3.91048	271.7
4.00389	271.6
4.0957	272.8
4.1236	268.061
4.16082	271.5
4.32371	271.1
4.32371	271.1
4.37416	269.1
4.48023	269.8
4.57349	271.5
4.70298	270.7
4.76626	269.3
4.87412	268.6
5.00411	269.8
5.0942	267.6
5.15953	265.3
5.27392	265.2
5.37013	267.6
5.4756	265.9
5.5625	265.5
5.65739	260.7
5.71594	266.7
5.85515	265.5
5.99827	263.2
6.03948	262.7
6.13147	261.2
6.26312	261.1
6.35391	259.4
6.43403	262.1
6.54485	262.9
6.61714	258.1
6.71271	257.6
6.7346	262.184
6.8383	262.3
6.94122	263
7.02846	260.7
7.11231	258.4
7.2338	260.1
7.31968	260.4
7.41291	259.7
7.50685	259.2
7.58958	260.8
7.69097	259.6
7.78102	259.3
7.8728	254.513
7.87593	258.3
7.9895	261.3
8.05036	260.7
8.1813	261.8
8.28084	259
8.38652	260.9
8.47715	260.4
8.5788	259.3
8.65251	262
8.6695	259.594
8.78433	263.7
8.86919	263.8
8.97334	265.2
9.09188	260.6
9.14008	260.9
9.23203	263
9.31707	263.8
9.536	264.4
9.59672	264.2
9.72111	264
9.80655	263.4
9.9092	265.7
9.9827	264.9
10.0878	267.5
10.1669	261.586
10.2093	266.9
10.2941	266
10.4168	265.1
10.5269	267.6
10.6212	264.8
10.744	264.8
10.8055	265
10.8273	265.3
10.8946	264.4
10.9332	264.1
10.9834	263.678
11.0138	264.2
11.0872	264.5
11.1355	264
11.2011	263
11.2363	265.2
11.2784	258.8
11.3377	260.8
11.3923	255.4
11.4224	244.751
11.4363	253.9
11.4694	253.8
11.58	250.7
11.6353	249.7
11.6757	251.1
11.727	250.7
11.8195	245.3
11.8807	238.276
11.8964	245.3
11.958	246.6
12.0499	243.2
12.1221	240.3
12.3708	237.5
12.4964	237.6
12.6418	234.2
12.76	238.3
12.9419	237.3
13.0899	237.9
13.2409	237.6
13.3561	236.185
13.4405	236.4
13.5423	239.2
13.6529	238.6
13.8044	238.6
13.9482	239.1
14.0095	225.227
14.3027	228.5
14.5497	228.4
14.7247	226.1
14.8897	225.2
15.0116	224.5
15.2329	222
15.438	221
15.5701	220.9
15.7419	219.4
15.8859	214
16.073	207.5
16.2597	207.7
16.4524	202.9
16.659	200.8
16.8702	195.2
17.1111	193.9
17.3748	191
17.5645	188.5
17.8086	188.5
17.9426	189.2
18.2849	187
18.5408	188.6
18.8283	189.4
18.8683	192.3
18.9213	188.3
19.3471	188.7
19.5089	188.8
19.7481	190
19.9884	188
20.0234	182.194
20.168	188.2
20.1968	195
20.5024	187.8
20.7478	186.9
21.0109	186.5
21.2574	184.7
21.5074	186.1
21.8541	185.7
22.0146	184.4
22.8273	189.167
25.994	191.558
29.0632	188.47
30.0203	191.657
35.0085	205.304
37.4706	209.09
43.4996	209.09
47.3355	189.266
48.854	188.37
49.6895	210.086
50.663	215.664
52.3819	190.362
57.0878	221.74
57.657	210.385
62.8585	195.343
64.939	191.358
65.9393	194.944
71.0485	227.319
73.2273	229.112
77.1502	217.059
78.1825	221.74
80.614	230.905
82.4172	241.066
83.333	236.384
84.0163	228.016
85.0199	214.17
86.181	216.959
87.9172	207.994
90.3573	224.231
91.2494	228.315
94.3533	232.001
99.8489	225.825
100.837	230.805
101.749	236.882
103.465	228.116
104.704	236.882
105.636	230.606
107.579	238.177
108.153	245.648
109.803	251.226
111.862	256.705
113.262	266.268
114.096	261.387
114.601	274.53
115.118	273.241
116.501	262.483
117.75	267.563
118.649	273.739
119.672	271.946
120.382	265.172
121.017	277.624
122.344	272.145
123.07	276.429
124.213	268.659
124.257	266.567
124.789	266.268
125.081	279.716
125.262	273
125.433	277.126
126.347	273.739
126.598	267.065
126.886	262.483
127.132	262.582
127.622	275.333
127.907	275.6
128.344	274.038
128.372	287.087
128.609	286.788
128.866	282.605
129.146	264.076
129.34	263.379
129.652	257.9
129.736	258.996
131.329	245
131.455	240.368
131.728	228.9
132.492	223.5
133.069	223.932
133.105	220.3
133.427	210.6
134.123	208.89
134.287	203.7
134.959	204.507
135.114	200.4
135.207	198
135.603	198.032
135.883	201.718
136.011	200.7
136.251	202.415
136.567	195.841
136.655	201.1
137.293	194.347
137.633	193.351
137.982	194.2
138.185	190.163
139.274	192.255
139.617	196.5
140.899	195.6
140.96	196.439
142.058	190.362
145.363	196.937
148.831	203
149.803	191.856
149.921	188.9
151.423	200.6
154.48	188.968
155.395	185.481
155.813	187.5
159.562	204.308
159.943	196.5
161.679	191.558
162.228	190.1
163.024	186.7
163.698	183.788
164.439	196.6
167.183	197.833
169.492	197.734
171.351	196
172.434	190.262
173.135	189.4
173.394	190.063
175.305	207.695
177.139	213.174
178.179	217.656
179.117	198.1
180.067	199.726
182.046	203.412
184.685	210.683
186.697	231.304
188.436	231.403
189.076	220.3
190.352	217.955
192.91	226.5
193.481	220.047
195.017	226.4
195.673	241.2
196.179	242.56
198.972	250.927
199.918	239.073
201.163	247.64
202.413	244.4
202.874	231.9
203.317	232.2
203.837	228.6
204.48	226.3
204.908	229.4
205.362	231.4
205.952	238.1
206.144	237.2
206.81	230
207.119	240.5
207.544	242.2
208.064	244.552
208.254	243.9
208.803	247.242
208.995	252
209.432	246.9
209.817	239.5
210.154	257.4
210.813	243.4
211.858	251.2
212.716	241.4
213.27	240.29
213.536	242.6
213.984	247.5
214.459	251.7
214.794	251.05
215.382	245.3
216.352	240.5
218.361	214.1
219.116	216.1
220.058	207.1
220.739	208.8
222.03	205.6
224.269	203.3
224.923	215.664
225.909	235.5
226.711	234.5
227.027	233.096
227.776	224.5
229.423	232.399
230.422	233.9
231.065	241.6
234.817	245.2
235.48	252.1
236.114	241.364
236.734	247.4
237.294	243.058
237.868	239.1
238.558	245.6
239.013	245.8
239.477	247.4
239.973	252.8
240.945	259.7
241.366	263.2
242.007	279
242.346	280.2
243.071	263.7
243.429	252.3
243.856	249.9
244.347	236.7
244.864	230.4
245.44	219.4
247.681	214.7
250.132	200.2
251.005	213.9
251.863	195.4
252.739	196.7
253.636	195.4
255.498	199
256.309	201.9
257.1	204
258.661	203.9
260.353	209.6
260.916	205.7
262.092	208.9
262.93	214.6
264.509	228.1
265.653	199.9
266.326	211.7
267.442	188.7
268.181	187.2
269.154	194.2
270.222	198.8
271.256	184.65
272.311	190.4
273.31	193.9
274.321	194.1
275.35	198.4
276.326	193.2
277.361	202.2
278.35	204.5
279.32	211
280.269	215.3
281.758	223.7
283.785	231.3
285.38	228
286.128	226.4
287.036	231.4
287.538	230.4
288.233	231
290.153	234.9
290.729	220.4
291.367	217.1
292.405	207.6
293.057	206
293.779	206.7
294.568	212.7
295.93	213.1
297.921	217.1
298.741	224.4
299.621	231
300.472	236.1
301.402	239
302.28	236
303.226	240.2
304.232	240.7
304.901	250.2
305.654	248.6
306.547	244.8
307.495	225.8
308.744	227.8
309.389	226.2
310.168	233.2
311.013	237.8
311.868	239
312.676	241.9
313.413	251.6
314.144	256.7
314.867	257.1
315.572	246.8
316.2	272.6
316.897	251.6
317.734	245.2
318.558	233.4
319.48	255.8
320.358	249.2
322.015	257.2
322.767	260.4
323.526	260.3
324.28	260.5
324.971	266.2
325.72	264
326.321	266.1
326.972	270.1
327.59	271.9
328.221	275.1
329.475	265
330.208	271.7
330.74	272.6
331.438	273.1
331.944	282.4
332.285	289.1
332.462	288.4
332.919	298.6
333.38	278.1
333.89	285.8
334.261	278.6
334.748	270.5
335.287	255.7
335.918	241.9
336.725	239.6
337.391	234.2
339.298	250.1
340.456	200.7
341.802	205.2
343.282	204.8
344.446	211.9
345.98	220.3
348.298	221.1
349.688	216.2
350.925	209.4
352.275	209.2
355.302	193
356.898	186.1
358.712	185.8
360.957	201.2
363.385	206.3
366.235	201.9
367.856	199.9
369.446	214.7
371.09	224.6
372.646	229.6
376.568	227
378.096	240
379.696	239.1
381.132	246.8
382.67	245.8
384.534	258.1
385.398	264.6
386.144	259.2
388.062	255.2
389.946	250.1
391.896	266.3
392.544	259.5
393.579	273.6
393.591	274.6
394.56	260.7
395.116	277.1
396.636	278
397.911	288.9
398.086	276.3
399.722	277.1
400.504	283.2
401.109	279.6
402	283.07
402.731	275.7
402.769	281.2
403.609	283.6
404.181	276.5
404.927	280.5
404.968	276.2
406.368	279.6
407.093	285.6
407.442	285.5
408.475	286.9
408.6	284.5
409.383	275.2
409.383	274.2
409.75	277.6
410.206	282.6
411.071	283.5
412.453	274.6
412.962	274.9
413.948	264.9
414.963	271.6
415.167	275.7
415.717	276.373
415.955	276.2
416.193	271.661
416.545	279.9
416.965	268.5
417.191	273.366
417.391	278
417.698	271.847
417.923	276.3
417.979	277.7
418.245	274.551
418.544	276.5
419.013	273.3
419.26	273.682
419.808	271.19
419.933	266.6
420.107	268.9
420.35	273.779
421.443	274
421.484	268.58
422.074	266.434
422.374	276.6
422.374	274.3
422.649	270.621
423.207	273.2
423.491	270.9
423.764	267.749
424.332	268.318
424.604	273.7
424.84	270.825
425.242	269.961
425.569	265.374
425.678	257.7
425.975	255.265
426.598	252.053
426.953	254.1
427.285	248.224
427.566	242.547
428.394	229.7
429.006	219.743
429.876	227.167
431.063	211.497
431.445	207.607
432.599	209.839
433.674	207.505
433.925	199
434.804	200.316
435.989	201.747
437.152	201.349
437.58	201.5
437.601	207.8
438.356	202.046
438.986	205.9
439.565	199.111
441.22	201.069
442.411	203.468
443.562	208.065
444.65	201.671
445.829	201.247
446.984	204.92
448.103	201.887
449.244	198.359
450.455	193.348
451.593	192.54
452.283	199.083
452.795	204.289
453.514	203.336
454.023	208.263
455.279	202.416
456.591	195.488
458.049	190.706
459.43	194.41
460.792	199.948
461.687	205.164
462.133	209.971
463.456	208.098
464.866	204.368
466.265	203.42
467.602	205.501
468.323	206.464
468.81	215.511
469.47	218.668
469.941	229.194
470.597	232.744
471.046	243.735
471.763	243.899
472.095	245.602
473.102	241.218
474.162	233.091
475.218	232.824
476.24	236.636
477.162	239.114
477.719	236.547
478.124	231.288
478.721	220.802
479.144	218.806
480.108	223.777
481.035	223.364
481.932	227.252
482.803	231.407
483.649	231.383
484.465	231.238
485.276	233.015
486.043	232.909
486.816	231.328
487.541	237.073
488.268	242.018
488.689	240.946
488.996	252.81
489.475	249.279
489.722	242.601
490.445	243.276
491.191	246.686
491.959	243.749
492.738	239.709
493.507	239.149
494.311	238.326
495.085	238.481
495.853	237.6
496.608	236.441
497.366	236.521
498.104	232.796
498.865	230.636
499.61	230.785
500.363	228.236
501.13	230.822
501.866	231.185
502.625	231.998
503.375	232.157
504.083	234.146
504.777	233.933
505.516	235.481
506.287	235.964
507.011	238.213
507.714	237.023
508.476	240.315
509.247	233.362
510.008	236.39
510.765	235.161
511.515	242.031
512.269	238.231
512.997	239.21
513.724	241.523
514.429	242.987
515.113	247.205
515.771	246.192
516.417	245.47
517.069	245.264
517.706	247.714
518.334	245.484
518.965	243.496
520.892	241.926
521.552	236.837
522.216	235.791
522.923	233.716
523.666	230.263
524.409	227.84
525.164	224.688
525.908	222.707
526.661	221.181
527.454	220.314
528.262	220.711
528.747	214.52
529.101	211.4
529.64	204.396
530.016	200.025
530.685	195.133
531.035	193.76
531.662	190.482
532.119	199.782
533.246	199.429
534.364	204.973
535.483	206.362
536.622	212.947
537.77	211.218
538.959	205.028
540.154	203.641
541.345	208.126
542.502	210.276
543.676	209.644
544.804	209.743
545.956	204.572
547.013	202.462
547.573	208.758
547.972	213.628
548.933	215.168
549.83	219.881
550.637	221.73
551.124	222.325
551.452	226.293
551.979	222.06
552.25	220.334
552.961	223.572
553.626	224.285
554.254	226.653
554.831	233.895
555.345	241.012
555.637	243.021
555.839	249.091
556.143	243.993
556.364	250.52
556.724	245.556
556.889	240.413
557.385	238.094
557.887	234.496
558.183	229.706
558.393	230.156
558.929	230.302
559.461	228.286
559.972	231.565
560.459	231.878
560.93	234.616
561.309	234.065
561.846	240.115
562.272	242.288
562.69	245.694
563.115	245.813
563.517	247.618
563.918	251.411
564.311	252.357
564.699	252.649
565.077	251.385
565.466	253.722
565.851	254.32
566.233	253.875
566.619	254.456
567.007	253.186
567.381	253.93
567.777	252.787
568.167	252.983
568.556	250.19
568.946	251.322
569.331	250.022
569.728	251.348
570.139	251.802
570.548	251.809
570.955	249.572
571.367	251.564
571.775	250.301
572.19	246.31
572.619	247.657
573.037	249.186
573.462	248.721
573.902	251.767
574.353	251.862
574.803	252.08
575.265	248.864
575.73	252.544
576.222	252.897
576.723	251.297
577.242	251.342
577.769	251.079
578.305	249.057
578.857	252.923
579.435	251.473
579.821	244.14
580.019	243.807
580.4	236.17
580.695	230.255
581.16	225.207
581.507	219.413
582	215.446
582.391	209.883
583.034	206.681
583.413	210.639
586.406	223.958
586.893	225.993
587.647	234.401
588.034	238.784
588.716	246.346
589.224	250.205
589.868	248.105
590.335	243.555
590.893	237.378
592.279	225.679
592.697	229.387
593.415	233.163
593.87	238.148
594.639	237.977
595.189	232.918
595.95	221.217
596.515	216.441
597.443	216.273
597.966	219.022
598.833	225.972
599.434	229.381
600.882	232.455
602.278	237.858
603.673	239.14
605.076	244.532
606.374	248.48
607.708	254.578
608.929	259.224
610.136	257.745
611.319	259.647
612.514	258.036
613.709	256.028
614.923	252.519
616.227	252.436
617.544	252.284
618.955	247.868
620.338	245.401
621.76	242.982
623.214	238.579
624.69	237.252
625.57	234.309
626.215	227.771
627.211	214.932
627.999	204.958
629.446	198.678
630.295	199.909
632.001	199.546
632.856	195.567
634.592	192.123
635.489	193.863
636.957	192.97
638.127	194.271
639.848	187.746
640.76	189.053
642.405	190.218
643.204	190.372
644.662	194.077
645.47	194.568
646.723	188.596
647.588	190.532
648.946	192.117
649.598	194.791
650.891	187.828
651.556	191.999
652.802	185.789
653.448	185.286
654.473	191.324
655.202	193.244
656.286	198.383
656.882	198.716
657.923	191.256
658.474	189.177
659.524	182.357
660.084	183.92
660.981	186.633
661.65	189.764
662.669	187.822
663.206	188.969
664.192	189.088
664.69	185.812
665.645	178.17
666.174	178.518
666.995	172.712
667.569	171.63
668.447	175.59
668.934	178.523
669.751	185.466
670.176	189.302
670.916	192.624
671.286	194.552
671.926	192.477
672.386	194.79
673.095	198.742
673.475	202.266
674.173	209.245
674.521	213.655
675.589	220.043
676.17	217.394
676.524	213.995
677.068	215.574
677.38	217.427
677.984	226.459
678.291	229.979
678.914	230.847
679.252	230.321
679.732	222.985
680.081	225.044
680.608	218.414
680.92	216.226
681.531	217.278
681.849	219.718
682.446	222.622
682.762	221.313
683.262	218.741
683.612	217.516
684.142	217.483
684.419	219.447
684.949	219.491
685.217	219.73
685.716	223.453
685.98	224.352
686.425	224.299
686.726	227.306
687.227	228.669
687.47	228.841
687.949	232.331
688.195	232.963
688.652	235.756
688.881	234.864
689.304	235.787
689.603	239.944
690.057	235.639
690.294	234.792
690.771	239.975
690.999	234.01
691.432	235.553
691.672	236.646
692.057	235.464
692.338	235.923
692.765	232.884
692.99	234.8
693.433	234.072
693.639	234.132
694.068	235.392
694.3	234.354
694.672	235.782
694.941	236.9
695.383	236.727
695.618	237.638
696.062	234.627
696.287	234.752
696.717	235.428
696.963	232.884
697.331	232.361
697.66	232.221
698.12	230.995
698.386	228.006
698.88	226.393
699.102	227.652
699.633	227.628
699.909	226.011
700.389	228.74
700.744	227.639
701.242	228.151
701.606	228.839
702.158	229.296
702.381	230.328
702.988	232.379
703.384	232.828
703.934	231.184
704.211	231.157
704.973	233.913
705.41	228.544
706.141	228.58
706.409	228.094
709.68	219.712
710.237	220.172
711.104	218.866
711.421	218.729
712.833	218.547
713.843	222.253
714.288	221.679
715.18	217.696
715.75	222.11
716.704	208.085
717.065	204.979
718.064	192.852
718.779	184.278
719.794	187.824
720.337	195.163
721.318	206.329
722.039	211.314
723.133	213.429
723.464	213.17
724.445	210.266
725.059	206.252
725.937	206.649
726.322	208.098
727.192	204.524
727.732	205.508
728.568	205.051
728.921	205.384
730.299	203.955
730.949	204.093
731.329	204.907
732.141	203.798
732.548	205.932
733.261	203.883
733.543	204.404
734.223	205.282
734.604	207.364
735.167	201.708
735.459	201.295
736.079	204.133
736.46	209.653
737.034	208.125
737.266	211.329
737.889	210.598
738.272	206.522
738.844	200.26
739.137	197.84
739.842	185.02
740.277	178.858
741.021	178.609
741.307	176.583
742.075	177.915
742.558	182.263
743.233	181.729
743.589	180.39
744.354	181.199
744.843	181.961
745.836	180.23
746.643	183.133
747.11	180.785
747.759	180.78
748.101	180.353
748.913	181.443
749.401	182.912
750.194	184.77
750.476	183.975
751.301	186.183
751.83	190.105
752.605	188.004
752.978	196.455
753.984	191.548
754.394	195.781
755.241	200.541
755.495	201.869
756.357	205.992
756.871	210.705
757.561	215.037
757.962	219.238
758.259	215.303
758.475	217.641
758.883	217.863
759.306	214.934
760.202	208.823
760.5	206.862
761.453	206.124
762.064	212.046
762.871	215.954
763.319	214.966
763.686	225.684
763.934	221.419
764.249	224.112
764.833	222.592
765.735	216.793
766.11	215.729
767.096	213.509
767.737	217.708
768.655	222.431
769.05	221.351
769.514	228.086
769.787	225.996
770.133	231.453
770.447	235.613
770.724	238.21
770.994	235.558
771.26	237.722
771.708	229.451
772.076	230.887
773.043	229.998
773.68	233.327
774.548	236.867
775.051	240.451
776.037	238.788
776.636	243.914
777.556	246.343
777.9	246.089
778.798	245.789
779.364	243.852
780.268	248.498
780.612	242.781
781.535	248.664
782.059	246.221
783.263	252.063
784.147	246.947
784.692	250.739
785.413	253.267
785.789	255.362
786.587	260.329
787.076	256.944
787.805	248.104
788.033	247.911
788.887	229.486
789.381	226.305
790.153	218.158
790.538	221.312
791.491	215.403
792.081	205.141
792.943	204.012
793.26	209.033
794.608	199.379
795.202	195.186
796.467	189.317
797.099	188.413
798.512	190.95

## Sheet: EDC CH4
EDC3-gas-a age (ka)	CH4 / ppbv
0.0134	907
0.1257	784.47
0.1296	761.7
0.1512	710.49
0.1843	726.8
0.2021	695.648
0.2073	682.7
0.2581	679.308
0.2972	675.886
0.3445	651.437
0.3818	684.3
0.403	680.855
0.4589	670.145
0.4781	644.3
0.5334	669.668
0.5386	667.8
0.5535	680.389
0.6678	666.7
0.6778	668.91
0.7359	679.5
0.7423	643.3
0.8613	663.968
0.8693	647
0.8969	647.92
0.9394	640.2
0.9461	636.214
1.0372	634.7
1.0919	633.223
1.1316	643.7
1.2171	642.659
1.2252	628.7
1.2484	634.872
1.3378	634.929
1.3494	650.233
1.4308	631.3
1.4426	638.292
1.5269	631.7
1.551	630.438
1.6196	610.271
1.6286	623.3
1.6773	623.405
1.7172	614.5
1.7264	623.078
1.7744	617.615
1.7929	613
1.907	613.3
1.9513	605.4
1.9946	599.228
2.0448	603.7
2.1041	590.6
2.1149	594.286
2.1189	608.7
2.2078	601.7
2.2746	597.316
2.3092	594.7
2.321	594.106
2.325	597
2.3887	592.809
2.4136	604.448
2.4236	591.7
2.4818	578.893
2.5148	603
2.5188	590
2.6018	591.7
2.6241	586.369
2.7165	590.306
2.7195	580
2.7236	587.9
2.7348	582.518
2.7933	579.629
2.8001	578.3
2.8571	577.02
2.8773	577
2.9981	581.182
3.0262	572.7
3.1068	576
3.1392	589.457
3.2101	567.7
3.3076	581.3
3.3597	589.152
3.4331	572.7
3.5062	569.8
3.5169	559.538
3.5721	574.599
3.6023	595.668
3.6136	577.7
3.6903	578
3.6965	580.7
3.7732	575.875
3.8919	573.5
3.9047	578.393
3.9645	575.126
3.9862	548.927
3.9941	567.7
4.0788	575.7
4.0817	563
4.1415	570.3
4.1733	581.866
4.3053	577.3
4.3091	567.7
4.3254	579.021
4.3568	583.994
4.3659	569.7
4.4395	569.883
4.4606	568.1
4.4706	582.449
4.4735	561.7
4.496	580.067
4.5508	559.509
4.5893	579.701
4.6245	559.66
4.6828	563
4.7013	559.665
4.7399	569.902
4.7553	563.3
4.823	578.543
4.849	569.9
4.8644	572.681
4.8683	567.7
5.0016	561
5.0676	563
5.1115	550.596
5.1491	552.666
5.1562	558.3
5.2213	573.706
5.2695	560.745
5.2722	564.2
5.3371	576.801
5.3636	565
5.4181	570.136
5.4582	566
5.4737	579.566
5.5259	580.602
5.5496	563.481
5.5565	568.3
5.5979	591.124
5.6432	571.3
5.6505	577.661
5.6532	569.7
5.6569	581.46
5.6844	584.3
5.712	586.151
5.834	575
5.8702	569.991
5.9147	584.442
5.989	564
5.9932	602.465
6.022	591.7
6.029	597.155
6.033	581
6.058	596.648
6.1156	589.818
6.2516	590.127
6.2565	577
6.2635	583.192
6.3043	591.924
6.3412	577.119
6.3463	580
6.3502	581.05
6.3847	587.137
6.4036	587.7
6.4529	616.898
6.5028	601.595
6.5418	601.631
6.5984	599
6.6068	601.418
6.6097	595.3
6.6367	606.544
6.6909	603.6
6.7076	635.93
6.7087	603.3
6.7379	607.986
6.8166	605.3
6.9012	632.576
6.9235	607
6.9605	613.544
7.0156	631.044
7.0197	609.7
7.1049	612.446
7.1059	607.3
7.1274	622.515
7.2094	618.3
7.2532	618.227
7.2887	601.7
7.3104	623.192
7.4054	611.7
7.4084	602.444
7.4295	617.446
7.4964	625.224
7.4975	609.7
7.5232	617
7.5435	616.51
7.5726	622.7
7.6163	619.954
7.6599	619.069
7.6695	623
7.6882	619.572
7.704	623.333
7.7228	617.92
7.7615	619.531
7.7688	610.7
7.7782	612.465
7.8233	613.667
7.8413	620
7.8566	597.7
7.871	600.096
7.874	612.333
7.8918	589
7.9128	613.064
7.9566	624.3
7.9854	659.972
8.0121	632.333
8.0386	605.7
8.053	626.441
8.0657	632.667
8.0677	623.911
8.0893	651
8.1084	640.333
8.1552	641.85
8.1712	640.7
8.2016	659.556
8.2694	647.171
8.2732	649.3
8.331	664.598
8.3707	648.038
8.3778	659.7
8.4354	654.102
8.452	653.7
8.5228	661.599
8.5493	657.3
8.6439	670.74
8.6476	659
8.7081	675.442
8.7639	676.182
8.7712	657.5
8.8315	673.716
8.8416	657.3
8.9057	647.644
8.9609	670.7
9.0201	663.509
9.0808	671.35
9.0848	664.7
9.1336	664.042
9.1354	665
9.1488	666.43
9.2073	663.3
9.2814	675.023
9.305	670.914
9.3118	673.7
9.3912	676.335
9.4595	675.351
9.5095	682.3
9.533	685.401
9.5866	688.95
9.5916	683.3
9.6398	693.056
9.6995	676.3
9.7188	673.841
9.7942	669.589
9.8009	682.3
9.835	674.623
9.8821	685
9.9615	678
10.0362	717.052
10.0977	698
10.1916	694.286
10.2037	678
10.2525	682.457
10.2735	688
10.3936	672.164
10.409	661.3
10.4782	668.679
10.5175	652
10.6043	671.397
10.6119	666
10.6587	684.519
10.7071	680.7
10.8116	693.548
10.8175	673.3
10.8716	679.212
10.9245	703
11.0664	650.402
11.0778	633.3
11.1236	652.519
11.1301	654.3
11.2162	664.7
11.3249	643.488
11.3326	559
11.4099	469
11.6103	488.432
11.6246	467.7
11.7166	477.3
11.7983	462.016
11.8083	482.7
11.9212	462.3
12.033	480.257
12.0388	466.7
12.0935	478.59
12.3375	542
12.4768	650.994
12.4848	627
12.6049	643.3
12.7355	610.464
12.7473	646
12.8838	661.495
12.9097	661.7
13.0698	670.403
13.0786	653.3
13.2552	645.7
13.3561	628.433
13.4182	624.858
13.4279	618.7
13.4973	613
13.6246	618.6
13.6373	623.26
13.646	630
13.7714	611.7
13.9418	578.3
13.951	596.883
14.0098	568.876
14.2891	464.7
14.3117	476.02
14.5345	461
14.5468	469.617
14.5546	468.669
14.7109	459.3
14.8697	469.864
14.9662	475.7
15.2026	463.01
15.2167	451
15.3928	451.7
15.5452	441.38
15.555	456
15.8441	441.2
15.8651	438.439
15.87	473.3
16.0603	418.7
16.2133	423.7
16.2425	427.3
16.43	404.7
16.6043	409.2
16.6171	404.152
16.8261	408.3
16.8325	381.3
17.0458	395.4
17.0746	388.84
17.3164	371.3
17.5057	375.4
17.5308	366.152
17.5427	383.7
17.7888	366.3
17.9087	377.238
17.9233	371.3
18.2562	375.3
18.4901	370.9
18.508	378.336
18.5187	371
18.8733	372.742
18.8904	378.7
19.3165	365.7
19.4507	358.083
19.479	377
19.68	356.3
19.6929	351.3
19.9634	373.742
20.1243	375.3
20.4655	383.75
20.4686	366.733
20.7078	378.3
20.9541	364.808
21.2176	353.7
21.4695	357
21.7863	357.3
21.9856	355.3
22.7179	407.3
22.895	384.65
23.1296	390
23.2787	389.75
23.4722	389.7
23.7474	386.475
23.8881	398
24.0841	375.1
24.299	360
24.5155	372.7
24.7211	388.7
24.9274	372.475
25.3292	369.7
25.5991	365
25.8244	355
25.9896	364.125
26.6311	396.3
26.918	387
27.0739	386.2
27.3359	395.85
27.5035	406.3
27.6799	426.3
27.8957	381.925
28.1356	399
28.2855	402.375
28.502	414
28.7635	443.875
29.0909	388.3
29.3187	367.7
29.701	391
29.9796	399.3
30.1478	392.375
30.6182	409.7
30.7606	408.475
30.9744	391.7
31.1976	404.425
31.4039	412
31.7559	426.5
31.7929	421.625
31.8952	440.9
32.0694	457.4
32.163	470.8
32.2536	430.625
32.3699	451.9
32.4145	409.15
32.5876	410.4
32.6446	404.6
32.7677	404
32.8136	414.5
32.9038	432
33.0262	423.5
33.06	427.65
33.1484	439.6
33.2018	443.3
33.2484	444.3
33.4802	460.9
33.6879	478.7
33.7346	425.9
33.8095	415.4
33.8566	419
34.0458	420.4
34.0792	430.075
34.1848	430
34.3372	428
34.5307	447.05
34.5775	457
34.6682	489
34.9006	519.2
34.9044	519.85
34.9455	512.5
35.0605	514.3
35.1811	497.7
35.2381	491.85
35.3303	426.9
35.4894	420.6
35.6497	444
35.7641	425.6
35.8407	425.2
35.8929	440.75
35.9997	440.3
36.1044	441.3
36.3081	470.8
36.3736	468.5
36.5222	494.45
36.6126	523.8
36.9369	533.6
36.9882	534.375
37.1269	586.7
37.1876	536.3
37.1999	548.2
37.2983	571.9
37.3666	563.275
37.4061	580.4
37.5145	560.4
37.5241	556.7
37.559	543.9
37.6752	546.675
37.7512	539
37.8486	539.5
37.8933	481
38.0451	526.275
38.2372	443
38.4211	440.15
38.7974	455.1
39.0197	441.3
39.1756	450.1
39.3728	443.7
39.5909	427
39.754	418.7
39.7906	418.7
39.8078	410.9
39.9969	423.8
40.0308	422.3
40.0518	413.5
40.1621	442.4
40.2105	447.5
40.2185	440.403
40.2935	449.9
40.3708	429
40.425	420.1
40.6356	413
40.6486	418.5
40.8039	426.2
40.8478	446.9
40.8597	422.383
40.9509	433.3
41.0576	419.7
41.0685	433.9
41.1095	433.4
41.1656	441.68
41.223	457.4
41.2571	465.3
41.2651	461.9
41.351	465.1
41.3699	464.667
41.4609	467.2
41.6868	458.1
41.9268	413.879
42.0513	429.046
42.1628	416.1
42.2962	415.112
42.4961	455.9
42.6789	446.4
42.8394	471.4
42.884	470
43.036	486.3
43.1187	481.5
43.3452	463
43.4365	437.4
43.5897	415.43
43.8629	411.333
44.1622	430.6
44.4026	427.333
44.6746	468.67
44.9889	461.667
45.234	489.81
45.4141	466.667
45.6981	487.05
45.8772	499.333
46.2135	497.47
46.3394	514
46.5485	499.35
46.7449	493
46.9882	440.27
47.1877	432.1
47.2209	441.4
47.4711	424.5
47.6683	436.667
47.9524	452.8
48.173	414
48.6775	435
48.9385	461.23
49.2574	464
49.4882	433.5
49.7155	451.8
49.89	491.65
50.1916	469.667
50.4405	489.02
50.6224	493
50.9208	510.15
51.1438	515
51.4265	544.03
51.6208	517
51.8832	530.9
52.1197	526.6
52.3485	566.5
52.5322	542.667
52.814	529.3
52.9894	530
53.1987	535.1
53.4316	513
53.6885	438.15
53.872	438
54.1003	437.04
54.4027	461.6
54.8306	475.667
55.0851	514.37
55.2881	460.667
55.5924	466
55.7956	534.2
55.8066	483
56.3162	546
56.5923	550.1
56.79	542.9
56.8431	553.9
57.2564	541.667
57.5356	514.8
57.7212	519.667
57.9927	561.1
58.1577	554
58.3913	502.1
58.6101	523
58.88	454.2
59.0536	441.8
59.366	434.9
59.5903	425
59.8649	442.7
60.0486	426.333
60.3405	430.1
60.5478	425.333
60.812	412
60.8482	436.61
61.0508	431.667
61.6469	430.8
61.9571	438.7
62.2018	430
62.5555	443.7
62.8187	444
63.203	467.5
63.4322	484
63.767	488.8
64.0172	434
64.35	439.7
64.6539	461.9
64.984	461.1
65.2589	456.667
65.6152	475.6
65.9261	444
66.2551	460.7
66.4887	449.333
66.8177	459.3
67.0762	452.667
67.4323	470.5
67.7324	479.6
68.036	450.7
68.2794	456
68.6843	473.7
68.976	460
69.3603	462.1
69.5863	450.333
69.9327	489.8
70.1712	472.667
70.4446	469.8
70.6333	475.4
70.8656	481.5
71.0984	448.667
71.3532	430.9
71.6109	432
71.891	432.1
72.2087	457.333
72.529	452.8
72.8541	447.667
73.1253	452.3
73.4329	451.1
73.6851	460.7
73.9161	469
74.1569	467.1
74.391	476.667
74.6313	460.7
74.8847	415.667
75.1388	414.8
75.4246	424.333
75.7121	437.5
75.9721	422.2
76.241	465.8
76.5292	441.667
76.7962	441.6
77.0563	472
77.317	475.1
77.5943	450.333
77.8852	463.3
78.1502	477
78.3655	487.4
78.6455	496.975
78.9105	512.3
79.1466	515
79.3977	514.9
79.6256	536
79.8739	563
80.1036	535.333
80.3219	549.8
80.5697	549.333
80.8019	547.6
81.0763	584
81.284	576.1
81.5235	595.333
81.7411	571
81.9834	605.5
82.2121	616.7
82.4181	616.333
82.6395	622.3
82.866	629.333
83.0666	631.3
83.2765	559.7
83.511	514.6
83.7388	485.333
83.9723	465
84.2251	464
84.4611	444.7
84.7011	450.333
84.9494	442.8
85.2049	452.333
85.4414	454.1
85.7663	429.2
85.9461	425.2
86.2084	468
86.4716	428.5
86.7264	448
87.0044	445.6
87.3395	479.667
87.6142	506.5
87.9007	502.333
88.2005	507.8
88.5088	500.867
88.7782	494.3
89.0614	493.667
89.3222	475.8
89.581	463.333
90.1141	445
90.3997	447.3
90.6935	460.667
90.962	436.6
91.238	432.3
91.5519	447.5
91.7965	447.333
92.0631	436.9
92.346	437.333
92.6122	441.9
92.8915	439
93.4313	435.667
93.6828	442.1
93.9408	434
94.1979	453.9
94.4565	436.333
94.7013	452.6
94.963	442
95.2358	434.9
95.4879	453
95.7588	464.2
96.0209	485.667
96.2981	478.9
96.5571	495
96.8262	501.1
97.0847	491
97.3461	487.4
97.6222	504.667
97.8843	506
98.1447	511.333
98.393	512
98.6655	523.667
98.9421	526.2
99.2225	525.8
99.492	525.1
99.7553	530.333
100.024	529.5
100.329	547
100.619	537.4
100.899	547
101.169	538
101.431	542.333
101.691	510.9
102.022	490.8
102.245	508.9
102.542	472.333
102.843	469.5
103.157	498.333
103.458	515.4
103.787	559
104.104	573.3
104.42	581.333
104.724	602
105.034	595.8
105.364	572
105.699	617.667
105.992	601.4
106.276	595.333
106.548	590.5
106.849	483
107.157	444.8
107.48	460
107.818	464
108.185	474.7
108.576	485.6
108.962	507.667
109.311	495.1
109.649	508.667
109.993	502.4
110.33	504.667
110.67	491.7
110.982	496.333
111.309	472.7
111.649	474.3
111.985	455.5
112.311	455
112.633	463.55
112.953	466.667
113.334	451
113.596	470.667
113.887	470.7
114.456	473.1
114.729	473.6
115.002	472.2
115.265	501.333
115.536	496
115.812	501
116.073	495.1
116.338	504.333
116.599	528
116.842	543.667
117.095	533.3
117.34	546.2
117.816	548
118.036	544.7
118.269	578.667
118.509	565.4
118.743	577.667
118.963	578.5
119.24	590.667
119.412	566.5
119.629	571.2
119.842	566.4
120.07	575.667
120.273	567.8
120.497	590.667
120.713	613.3
120.915	598
121.123	600.8
121.334	613
121.536	609.8
121.742	603.2
121.947	608.7
122.161	607.333
122.356	608.4
122.555	599
122.767	606.5
123.003	606.833
123.181	608.3
123.388	615
123.589	616.3
123.8	611.1
123.998	613.5
124.193	621.333
124.39	621.8
124.654	632
124.822	626.6
125.021	641.667
125.225	642.2
125.436	646.667
125.634	655.7
125.865	657.875
126.059	650.2
126.272	659.667
126.487	639.7
126.679	651.333
126.856	650.4
127.03	646
127.228	670.3
127.421	677
127.596	681.1
127.637	678.8
127.773	692.1
127.933	706
128.108	715
128.27	703.6
128.423	722.333
128.585	725.5
128.75	644
128.921	534.5
129.097	536.667
129.274	551.5
129.445	550.7
129.629	531
129.806	515
130.011	512.1
130.233	499.333
130.409	521.2
130.64	518
130.875	487.1
131.113	493
131.351	494.1
131.624	479.2
131.906	455.8
132.208	461.333
132.546	461.7
132.876	460.333
133.239	448.8
133.603	506.333
133.984	427.5
134.389	436.333
134.8	415.1
135.302	403.6
135.803	381.5
136.372	408.667
136.805	375
137.524	394.667
137.819	394.9
138.451	405.667
138.869	367.6
139.405	432.333
139.971	357.7
140.518	342.4
141.075	349.1
141.618	359
142.167	368.1
142.777	375.333
143.21	385.1
143.799	401.333
144.302	400.875
144.834	375.333
145.399	390.9
146.029	402.3
146.433	409.8
147.048	421
147.509	423.4
148.034	470.667
148.582	427.8
149.19	432.667
149.636	441.2
150.126	404.333
150.648	400.1
151.183	432.2
151.714	422
152.361	425.667
152.781	413
153.338	401.5
153.922	402.6
154.465	393.333
155.022	384.5
155.565	406.667
156.158	399.2
156.783	421.7
157.431	400.2
157.997	410
158.52	407.2
158.998	440
159.476	406.9
160.008	415.333
160.611	410.1
161.339	423.667
161.79	413
162.321	442
162.846	410.9
163.365	417
163.974	392.9
164.549	383.5
165.148	423.8
165.733	433
166.31	449.3
166.907	479.333
167.49	495.3
168.011	495.9
168.492	444.9
169	478
169.553	442.3
170.163	447.5
170.766	484.2
171.346	480
172.43	433
173.139	455.9
173.633	427.3
174.186	457.3
174.739	471.333
175.341	466.1
176.029	499
176.674	546.8
177.251	550.333
177.778	541.6
178.421	479.333
178.919	482.5
179.577	451.9
180.22	489.9
181.019	496.333
181.564	495.9
182.273	527.667
182.915	529.9
183.716	532
184.208	513.9
184.855	475.667
185.543	458.7
186.206	447.2
186.912	436.5
187.416	446
187.931	461.85
188.496	425
189.023	423.3
189.601	432.333
190.259	470
191.07	471
191.602	495.5
192.1	511.9
192.692	502.8
193.279	493.333
193.915	472.1
194.5	487.667
195.063	530.1
195.605	534
196.104	548
196.616	564.333
197.115	588.8
197.582	579.4
198.036	598.4
198.465	609.333
198.904	667.5
199.35	627.333
200.348	539
200.741	529.7
201.293	538.667
201.659	541.3
202.163	466.3
202.676	489.4
203.252	435.667
203.797	493
204.351	462
204.886	487.7
205.376	490
205.881	505.5
206.351	487
206.852	499.2
207.34	512.6
207.786	504.4
208.353	515
208.713	511
209.153	532.333
209.613	547.9
210.053	565.333
210.478	558.3
210.904	579.333
211.35	593.2
211.802	576.7
212.261	583
212.692	585.667
213.129	573.2
213.588	573.667
214.052	590.7
214.518	561.333
214.965	568.6
215.431	505.667
215.915	456.9
216.402	479.8
216.94	454.4
217.166	443.1
217.406	451.9
217.642	445.3
217.767	452.7
218.168	459.6
218.425	495.4
218.683	460.5
218.948	469.4
219.216	488.8
219.493	507.6
219.775	537.6
220.065	476.5
220.376	484
220.679	490.9
220.988	488.2
221.324	500.7
221.644	495.4
221.985	503.6
222.288	528.2
222.579	519.1
222.929	542.5
223.266	489.2
223.602	463.95
223.868	504.15
224.332	475.8
224.687	496.1
224.9	515.7
225.906	555.9
226.256	532
226.537	547
226.713	546.8
227.185	502.6
227.532	504.3
227.888	490.5
228.247	516.8
228.592	489.5
228.941	471.4
229.261	472.5
229.421	464.3
229.877	474.3
230.181	506.333
230.522	456.2
230.864	417.3
231.21	428.8
231.405	431.4
231.844	429.3
232.135	432.8
232.434	440.2
232.761	434.2
233.053	419.4
233.327	429.2
233.593	456.8
233.874	429.9
234.149	425.5
234.43	433.4
234.681	452.5
234.937	519.233
235.078	461.9
235.427	478.2
235.692	498.8
235.92	508.15
236.101	481.15
236.389	511.9
236.611	518.4
236.862	529.3
236.992	554
237.108	543.1
237.309	545.1
237.432	547.65
237.765	539
237.874	565
237.981	557.1
238.109	553.7
238.318	566
238.415	549.7
238.641	549.2
238.754	587.667
238.848	549
238.948	559.15
239.048	564.5
239.154	578.667
239.268	563.8
239.49	566.1
239.574	577.333
239.661	562.3
239.835	594.15
239.934	597
240.027	591.8
240.213	600.7
240.303	605.667
240.391	599
240.579	609.2
240.671	616
240.761	615.7
240.937	610.9
241.025	627
241.104	622.7
241.279	641.3
241.378	661.233
241.617	648.2
241.69	667.333
241.754	653.4
241.907	673.4
241.977	696
242.046	680
242.198	594.3
242.278	523
242.356	539.2
242.51	520.9
242.597	515.333
242.673	519.2
242.833	525
242.923	541.8
243.346	537.9
243.438	557.7
243.706	546.1
243.922	541.2
244.155	528
244.385	528.2
244.61	523.3
244.85	519
245.08	501.8
245.222	503
245.595	494
245.884	475.3
246.193	485.5
246.532	513.1
246.884	507.5
247.072	544.8
247.563	524.7
247.861	524.8
248.038	539.6
248.528	472.8
248.851	465.8
249.179	408.2
249.546	410
249.907	413.4
250.261	408.4
250.62	431.8
251.732	400.8
252.157	395.2
252.542	396.2
252.93	400.5
253.301	398.2
253.688	425.85
253.909	427.3
254.442	420.2
254.787	405.2
255.154	441.7
255.547	422.2
255.966	448.1
256.3	474.8
256.693	466
257.078	483.4
257.44	464.9
257.622	450.1
258.163	492.7
258.512	509.8
258.891	495.8
259.279	430.25
259.671	473.4
260.017	451.4
260.406	433.5
260.799	455.7
261.157	451.8
261.559	423.5
261.948	442.5
262.337	480
262.745	481.5
263.141	508.7
263.462	461.9
263.843	413.7
264.223	417.2
264.595	398.4
264.978	414.5
265.368	411.9
265.793	422.4
266.23	416.6
266.629	384.185
267.068	425.3
267.517	413.8
267.955	418.1
268.396	454.2
268.848	423.4
269.298	454.2
269.543	439
270.202	460
270.647	440.9
271.117	458.4
271.607	453
271.832	445.371
272.512	470.2
272.783	451.4
273.502	482.8
273.948	467.4
274.416	463.4
274.884	475.4
275.358	455.2
275.824	478.8
276.27	503.8
276.674	467.3
277.101	451.845
277.549	479.5
277.795	465.8
278.456	428.449
278.71	438.4
279.313	419.7
279.767	463
280.147	454.8
280.346	473
280.893	461.6
281.302	447.9
281.732	456.9
282.121	468.4
282.51	425.1
282.891	452.7
283.253	471
283.611	498.6
283.986	508.5
284.366	464.6
284.733	476.5
285.07	457.4
285.431	469.6
285.789	485.8
286.136	495.2
286.495	500
286.838	506.5
287.159	520.152
287.495	528.8
287.827	513.8
288.126	520.9
288.481	510.9
288.833	532.3
289.191	529.9
289.525	531.4
289.851	546.9
290.168	524
291.228	454.3
291.633	458.8
292.029	448.1
292.388	453.25
292.768	444.2
292.959	453.667
293.626	482.4
293.866	520.667
294.534	488.6
294.795	500.667
295.458	552
295.665	564.333
296.258	586.6
296.466	524
297.06	487.552
297.265	505
297.945	466.638
298.185	490.667
298.893	518.8
299.091	518
299.738	496.282
300.122	517.5
300.322	520
300.921	459.4
301.142	487.333
301.824	453.2
302.056	453
302.617	456.194
302.848	462.333
303.432	466.4
303.637	477
304.262	490.57
304.471	489.667
305.047	498.459
305.236	505.333
305.802	451.118
306.004	448.667
306.638	459.3
306.869	485
307.556	458.7
307.795	465.667
308.45	477.8
308.67	509.333
309.322	466.5
309.56	460.333
310.196	460.632
310.433	492.667
311.027	469.5
311.233	517
311.862	514.5
312.051	516
312.673	522.2
312.87	540.333
313.386	547.5
313.55	568.333
314.11	552.9
314.298	634
314.855	618.2
315.045	606
315.565	597.7
315.762	635.333
316.289	607.3
316.472	515.333
317.027	464.563
317.23	458.667
317.801	444.6
318.009	480
318.62	480.815
318.837	479
319.461	477.5
319.665	480
320.268	497.7
320.472	503.333
321.023	520.8
321.214	528.667
321.731	519.3
321.91	528.333
322.406	518.5
322.576	532.667
323.064	544.498
323.228	556.667
323.672	592.5
323.813	568
324.24	580.2
324.409	589.667
324.841	612.2
324.997	617.333
325.417	626.1
325.555	644.333
325.95	633.2
326.098	634.667
326.487	611
326.623	634.333
327.027	644.3
327.169	654
327.563	642
327.701	662
328.082	657.4
328.742	669
329.179	635.7
329.326	657.667
329.727	643
329.87	663.333
330.241	620.9
330.381	637
330.755	615.3
330.9	637.333
331.288	636.4
331.425	649.333
331.782	672.7
332.04	721.3
332.149	726
332.457	738
332.576	776.333
332.875	798.2
332.988	797
333.284	599.2
333.504	589.8
333.718	603.8
333.839	607.333
334.144	631
334.286	652
334.637	580.7
334.778	597
335.162	569.6
335.31	566
335.748	537
335.946	531
336.443	496.2
336.652	504
337.187	485.8
337.414	486
338.101	452.5
338.565	445
338.607	444.9
339.122	464.5
339.397	459.667
340.21	449.3
340.526	439
341.491	395.4
341.84	393.667
342.836	370.4
343.421	365.8
344.111	374.5
344.483	368
345.351	373.95
345.679	389.333
346.608	391.3
347.204	417
347.852	403.1
348.173	421.333
349.046	459
349.346	406.667
350.169	391.8
350.456	402.333
351.426	414.2
351.759	403.333
352.646	397.3
353.222	404.8
353.844	395.3
354.536	405.8
355.205	402.9
355.842	404.2
356.504	420.4
357.194	434.6
357.857	431.1
358.574	416.7
359.202	417.6
359.863	456.2
360.513	415.1
361.222	420.2
361.842	465.9
362.441	432.7
363.043	486.5
363.649	413.3
364.269	448.5
364.942	416.2
365.577	460.1
366.206	415.8
366.849	403.1
367.431	459.5
368.074	421.7
368.738	421.8
369.324	444
369.917	517.9
370.497	508.2
371.134	491.1
371.763	501.6
372.327	523.4
372.893	540.3
373.466	451.1
374.092	445.2
374.785	426.2
375.451	425.9
376.106	432.9
376.706	444.6
377.33	442
379.119	494.1
379.707	484.5
380.256	547.7
380.863	543.7
381.423	547.9
381.955	600.6
382.547	587.4
383.125	481.6
383.713	536.4
384.291	560.9
384.857	552.5
385.452	577
386.03	594.1
386.615	637.3
387.178	531
387.768	462.7
388.422	452.4
389.115	471.5
389.771	567.8
390.39	525.2
390.975	505.8
391.532	488.4
392.145	489.2
392.666	498.4
393.193	484.9
393.699	562
394.195	549.6
394.677	593.5
395.128	585.2
395.554	602.7
396.057	594
396.524	601.8
396.914	590.1
397.339	605
397.761	600
398.175	612.3
398.595	608.3
399.02	592.9
399.415	580.4
399.808	606.5
400.204	606.811
400.592	662.4
400.979	628
401.336	626.9
401.709	633.3
402.09	646.2
402.455	642
402.816	640.2
403.179	653.2
403.552	681.2
403.901	664
404.254	674
404.665	661.3
405.009	662.9
405.368	659
405.728	699.9
406.069	707.5
406.453	672.335
406.823	691.1
407.172	736
407.544	710.1
407.909	681
408.31	694.6
408.69	710.7
409.065	714.3
409.474	699.4
409.87	709.7
410.307	713
410.739	701.2
411.171	694.1
411.611	700.1
412.062	711.5
412.582	658.9
413.067	656.1
413.561	690.3
414.032	695.7
414.575	676.6
415.082	638.4
415.568	638.8
415.785	619.7
416.037	623.1
416.26	629.6
416.571	633.3
417.082	633.7
417.257	670.7
417.568	646.5
417.763	668.2
418.105	635
418.316	657.6
418.622	660.4
418.89	654.8
419.366	665.4
419.675	686.6
419.876	673.9
420.241	695.1
420.446	678.2
420.741	699.3
421.356	702.7
421.565	684
421.981	688.8
422.157	671.8
422.546	689.4
423.019	660.15
423.351	648.6
423.826	622.2
424.216	598
424.408	603.5
424.716	618.3
424.884	605.2
424.967	584.1
425.174	497.5
425.229	502.8
425.613	507.7
426.027	456.6
426.397	462.6
426.613	458.7
427.082	465.326
427.385	411.5
427.851	417.9
428.779	472.3
429.133	405.7
429.789	382.3
430.033	380.1
430.798	384.5
431.194	393.6
431.914	389.2
433.07	391.5
434.102	380.6
435.315	380.6
436.463	384.7
437.658	394.7
438.431	391.5
440.096	404.5
440.67	400
441.875	437.506
443.067	438.667
443.533	439
444.186	491
444.582	427.333
445.223	408.667
445.762	452
446.579	474.333
446.931	506.333
447.614	427.333
448.688	388.667
449.912	381
451.101	383.7
452.199	402.667
453.424	426.333
453.892	486
454.686	467.667
455.24	434
456.01	412.4
457.424	408.333
458.891	398
460.159	408.667
460.717	424.333
461.547	521.4
462.089	463
462.847	491.333
464.25	447.667
465.669	442
467.07	490.9
467.677	491.333
468.38	429.667
469.423	442.667
470.473	482.333
471.612	481.8
472.626	440
473.673	456
474.731	474.667
475.784	504.1
476.772	517
477.675	528
478.702	496
479.71	531.1
480.085	503.667
480.637	491.667
481.552	504.333
482.408	506.667
483.277	516.4
484.106	543.667
484.92	543
485.717	568.667
486.455	582.6
487.219	583.333
487.933	615.333
488.643	624
489.384	587.5
490.115	558.333
490.83	584
491.606	534.333
492.388	500.5
493.162	500
493.943	517
494.738	495.667
495.513	514.3
496.272	521.667
497.01	516.333
497.773	506
498.527	509.1
499.276	499.333
500.018	495.667
500.777	511.667
501.571	521.9
502.249	517.333
503.038	515.333
503.805	549
504.48	566.4
505.155	524
505.949	579.333
506.692	601.333
507.399	573.2
508.115	582
508.907	556.667
509.665	533.333
510.442	519.6
511.19	495
511.926	487
512.667	486
513.397	488.3
514.118	496.333
514.805	507
515.495	519.333
515.758	482.667
516.129	477.4
516.404	501.333
516.772	508
517.417	507.333
518.045	512.333
518.672	499.1
520.597	524
521.261	521.9
521.905	535
522.59	516
523.317	533.667
524.078	517.8
524.823	533.667
525.585	538
526.314	541
527.09	528.9
527.878	518.333
528.194	519.667
528.701	463.667
529.574	440.667
530.569	449.8
531.63	420.333
532.716	422.333
533.851	458
534.918	449.4
536.138	490.333
537.238	496.667
537.729	467.333
538.41	448
538.935	415.333
539.619	399.6
540.796	391
541.98	408
543.191	404.667
544.348	426.5
545.449	418.333
546.657	408.667
547.534	390
548.537	433.5
549.454	456.333
550.303	472
551.097	477.333
551.938	490.8
552.32	443
552.679	431.333
553.319	471.333
553.966	500.667
554.58	519.4
555.123	557.333
555.614	577.667
556.118	575.333
556.728	530.667
557.173	495.667
557.673	442.667
558.177	442.667
558.695	467.9
559.24	492.333
559.761	501.333
560.241	515.667
560.45	510.667
560.922	464.333
561.403	483.667
561.642	486
562.088	497
562.499	494.6
562.919	532.333
563.344	528.667
563.731	554
564.135	549.5
564.522	579
564.909	581.333
565.285	589.333
565.684	576.5
566.058	627
566.451	618
566.838	626
567.218	620
567.592	603.333
567.987	615
568.38	613
568.77	588.5
569.159	590
569.548	589
569.947	587.667
570.369	579.8
570.766	597
571.178	594
571.602	610.333
572.001	603.8
572.425	614
572.849	612
573.262	613.333
573.699	598.4
574.147	619.5
574.596	605
575.047	600
575.523	580.5
575.989	589.333
576.503	584
577.002	596.667
577.533	578.9
578.05	602
578.591	601.667
579.149	618.333
579.737	608.7
579.954	520.667
580.323	505
581.064	484.333
581.974	488.333
582.906	482.4
586.367	470.333
587.546	451.2
588.615	468
589.836	480.333
590.38	428.333
592.154	483
593.338	509.667
594.462	538.667
595.109	463
595.9	448.333
597.274	465
597.934	495.667
598.795	544
600.231	534.333
601.645	542.333
603.066	525.9
604.462	503
605.857	532.667
607.155	537.667
608.425	577.9
608.891	576.667
609.587	582.667
610.788	592.667
611.955	619.667
613.17	600.7
614.353	620.333
615.58	617
616.953	611
618.346	603.8
619.68	602.333
621.047	609.333
621.696	626.667
622.576	660.667
623.18	618.333
624.017	571.7
624.596	572.667
625.471	478.333
626.019	474
627.026	386.333
629.09	355.667
631.745	376.4
634.297	360.667
636.877	373.333
639.598	373
642.439	369.4
643.184	386.333
644.475	428.667
646.656	428.667
648.891	425.667
650.677	414.4
652.655	409
654.481	396.667
656.091	414
656.807	398.333
657.745	343.5
659.404	359.25
661.034	401.667
662.524	384.333
664.034	413.6
666.217	376
666.98	374.333
667.59	364.5
668.326	385
668.792	390.2
669.629	396.3
670.914	489.333
671	483
671.226	439.3
671.924	462.333
672.332	471.1
673.063	529
673.438	512.45
674.114	562.4
674.408	564
675.109	554.333
675.54	551.48
676.156	536
676.548	454.6
676.972	466
677.292	463.5
677.864	491.1
678.186	495.4
678.832	494
679.099	500.333
679.196	543.9
679.736	459.667
680.111	445.7
680.556	465.667
680.846	489.5
681.417	481.5
681.772	485.6
682.389	505.333
682.653	523
682.727	543.06
683.26	494
683.567	498.1
684.054	498.667
684.385	504.3
684.862	519.6
685.699	507.667
685.925	513.7
686.391	521
686.687	522.5
687.424	537.6
687.886	529.3
688.154	527.3
688.585	537.667
688.848	541.5
689.296	556.667
689.559	540
689.983	555.333
690.279	548.9
690.707	561
691.366	584.333
691.622	567.6
692.035	570.333
692.303	557.4
692.7	595.5
692.956	601.5
693.366	590.1
694.005	615
694.263	629
694.649	638.667
694.905	635.3
695.299	652
695.571	631.7
695.98	647.2
696.229	642.9
696.643	644.667
696.918	623.8
697.608	603.7
698.047	604.667
698.274	588
699.132	604.333
699.557	594
699.872	565.774
700.346	581
700.665	578.4
701.203	594.667
701.531	570.8
702.052	584.333
702.463	593.9
702.918	605.333
703.327	582
703.876	593.333
704.208	588
704.861	602.333
705.337	584.6
705.976	610.333
706.402	610.333
707.153	519.3
707.599	504.5
708.37	512.3
708.854	520.5
709.631	611.333
709.759	567.7
710.141	556.3
710.951	591
711.569	573.2
712.365	587.667
713.01	596.8
713.738	593
714.189	577
715.115	570
715.65	531.3
716.463	434.667
717.194	398.8
717.963	402.667
718.635	391.7
719.642	407.667
720.533	401.1
721.258	491.333
721.921	514.7
722.972	566.333
723.688	559.6
724.373	581
724.92	478.45
725.869	561
726.495	504.3
727.18	540.667
727.707	530.8
728.453	559
728.873	530.333
729.754	551
730.243	544.6
731.027	538
731.442	511.7
732.146	537.333
732.461	520.5
733.159	525.333
733.648	529.5
734.194	519.333
734.588	519.9
735.101	531.333
735.524	517.6
736.057	541
736.413	545.9
736.923	561
737.285	541.9
737.822	507.667
738.13	423
738.818	407.333
739.273	408.3
739.81	403
740.212	410.6
740.868	414
[truncated: 104 more rows]

## Sheet: LR04
LR04 age (ka)	d18O benthic
0	3.23
1	3.23
2	3.18
3	3.29
4	3.3
5	3.26
6	3.33
7	3.37
8	3.42
9	3.38
10	3.52
11	3.6
12	3.92
13	4.06
14	4.28
15	4.49
16	4.75
17	4.88
18	5.02
19	4.96
20	4.99
21	4.91
22	4.88
23	4.86
24	4.81
25	4.82
26	4.67
27	4.75
28	4.75
29	4.73
30	4.62
31	4.62
32	4.6
33	4.58
34	4.59
35	4.54
36	4.45
37	4.46
38	4.41
39	4.55
40	4.55
41	4.51
42	4.5
43	4.46
44	4.48
45	4.33
46	4.36
47	4.38
48	4.45
49	4.46
50	4.34
51	4.33
52	4.31
53	4.44
54	4.38
55	4.31
56	4.35
57	4.43
58	4.49
59	4.43
60	4.6
61	4.51
62	4.6
63	4.53
64	4.36
65	4.48
66	4.57
67	4.44
68	4.42
69	4.47
70	4.32
71	4.22
72	4.21
73	4.23
74	4.03
75	3.95
76	4.06
77	4.08
78	4.05
79	4.05
80	3.9
81	3.82
82	3.8
83	3.83
84	3.82
85	3.95
86	4.06
87	4.18
88	4.11
89	4.08
90	4.06
91	4.03
92	3.98
93	3.9
94	3.84
95	3.77
96	3.75
97	3.83
98	3.9
99	3.78
100	3.81
101	3.92
102	3.86
103	3.88
104	3.92
105	3.85
106	4
107	4.04
108	4.11
109	4.12
110	4.04
111	4.02
112	4.03
113	3.93
114	3.81
115	3.71
116	3.58
117	3.54
118	3.44
119	3.3
120	3.27
121	3.26
122	3.18
123	3.1
124	3.27
125	3.14
126	3.16
127	3.37
128	3.71
129	3.9
130	3.67
131	3.81
132	4.2
133	4.41
134	4.7
135	4.86
136	4.82
137	4.8
138	4.89
139	4.87
140	4.98
141	4.81
142	4.75
143	4.78
144	4.82
145	4.74
146	4.77
147	4.82
148	4.71
149	4.75
150	4.75
151	4.66
152	4.64
153	4.62
154	4.66
155	4.51
156	4.78
157	4.74
158	4.69
159	4.66
160	4.69
161	4.65
162	4.66
163	4.7
164	4.68
165	4.68
166	4.48
167	4.41
168	4.48
169	4.5
170	4.5
171	4.53
172	4.46
173	4.38
174	4.28
175	4.32
176	4.39
177	4.46
178	4.44
179	4.48
180	4.39
181	4.46
182	4.48
183	4.37
184	4.4
185	4.59
186	4.47
187	4.4
188	4.46
189	4.39
190	4.28
191	4.13
192	3.76
193	3.92
194	3.84
195	3.91
196	3.82
197	3.74
198	3.82
199	3.57
200	3.53
201	3.53
202	3.63
203	3.61
204	3.78
205	3.82
206	3.77
207	3.78
208	3.71
209	3.64
210	3.57
211	3.6
212	3.61
213	3.65
214	3.56
215	3.54
216	3.53
217	3.48
218	3.72
219	3.94
220	3.98
221	4.23
222	4.38
223	4.44
224	4.39
225	4.28
226	4.29
227	4.19
228	4.19
229	4.02
230	4.3
231	4.22
232	4.17
233	3.97
234	3.84
235	3.71
236	3.66
237	3.47
238	3.51
239	3.44
240	3.44
241	3.54
242	3.68
243	3.78
244	4.05
245	4.17
246	4.38
247	4.31
248	4.38
249	4.36
250	4.5
251	4.58
252	4.63
253	4.52
254	4.57
255	4.37
256	4.43
257	4.55
258	4.51
259	4.52
260	4.46
261	4.52
262	4.45
263	4.46
264	4.42
265	4.44
266	4.5
267	4.5
268	4.33
269	4.52
270	4.51
271	4.5
272	4.44
273	4.44
274	4.38
275	4.38
276	4.3
277	4.44
278	4.31
279	4.23
280	4.14
281	4.21
282	3.98
283	3.87
284	3.86
285	3.84
286	3.82
287	3.89
288	4.02
289	4.06
290	4.1
291	4.11
292	4.27
293	4.22
294	4.33
295	4.31
296	4.23
297	4.3
298	4.17
299	4.23
300	4.02
301	4.06
302	4.06
303	4
304	4.07
305	4.07
306	4.05
307	4
308	3.85
309	3.86
310	3.8
311	3.7
312	3.79
313	3.69
314	3.77
315	3.62
316	3.69
317	3.89
318	3.76
319	3.58
320	3.66
321	3.53
322	3.53
323	3.47
324	3.21
325	3.31
326	3.23
327	3.22
328	3.23
329	3.19
330	3.3
331	3.29
332	3.39
333	3.38
334	3.51
335	3.75
336	4.08
337	4.23
338	4.17
339	4.42
340	4.6
341	4.84
342	4.83
343	4.8
344	4.76
345	4.79
346	4.68
347	4.53
348	4.49
349	4.62
350	4.67
351	4.64
352	4.47
353	4.47
354	4.4
355	4.59
356	4.46
357	4.55
358	4.58
359	4.49
360	4.54
361	4.5
362	4.5
363	4.53
364	4.36
365	4.46
366	4.32
367	4.37
368	4.4
369	4.38
370	4.36
371	4.27
372	4.42
373	4.29
374	4.34
375	4.2
376	4.21
377	4.2
378	4.19
379	4.17
380	4.19
381	4.15
382	4.05
383	4.12
384	4.08
385	4.14
386	4.02
387	3.99
388	3.92
389	3.89
390	3.96
391	4
392	3.97
393	3.86
394	3.92
395	3.76
396	3.72
397	3.47
398	3.54
399	3.48
400	3.32
401	3.2
402	3.17
403	3.15
404	3.2
405	3.11
406	3.19
407	3.21
408	3.17
409	3.22
410	3.15
411	3.29
412	3.31
413	3.38
414	3.41
415	3.41
416	3.51
417	3.57
418	3.75
419	3.81
420	3.77
421	3.85
422	3.94
423	4.02
424	3.92
425	4.3
426	4.5
427	4.3
428	4.72
429	4.91
430	4.98
431	5.05
432	5.05
433	5.08
434	5.08
435	5.02
436	5.07
437	4.9
438	4.79
439	4.87
440	4.76
441	4.95
442	4.96
443	4.91
444	4.82
445	4.91
446	4.82
447	4.51
448	4.77
449	4.73
450	4.75
451	4.58
452	4.73
453	4.56
454	4.6
455	4.41
456	4.62
457	4.63
458	4.55
459	4.63
460	4.56
461	4.59
462	4.61
463	4.61
464	4.44
465	4.57
466	4.46
467	4.44
468	4.38
469	4.51
470	4.33
471	4.25
472	4.32
473	4.36
474	4.39
475	4.35
476	4.3
477	4.27
478	4.22
479	4.12
480	4.12
481	4.17
482	4.01
483	3.97
484	3.79
485	3.81
486	3.76
487	3.72
488	3.67
489	3.6
490	3.54
491	3.47
492	3.63
493	3.72
494	3.83
495	3.83
496	3.83
497	3.68
498	3.82
499	3.75
500	3.84
501	3.78
502	3.75
503	3.81
504	3.91
505	3.86
506	4.01
507	3.93
508	4.16
509	4.06
510	4.14
511	4.06
512	4.22
513	4.25
514	4.1
515	4.1
516	4.01
517	3.96
518	4.07
519	3.96
520	3.95
521	3.91
522	3.88
523	3.93
524	3.83
525	3.92
526	3.97
527	3.96
528	3.92
529	3.99
530	3.97
531	3.92
532	4.01
533	4.11
534	4.27
535	4.29
536	4.55
537	4.43
538	4.54
539	4.48
540	4.53
541	4.5
542	4.45
543	4.45
544	4.46
545	4.43
546	4.51
547	4.53
548	4.55
549	4.53
550	4.5
551	4.45
552	4.52
553	4.46
554	4.29
555	4.25
556	4.39
557	4.35
558	4.25
559	4.17
560	4.14
561	4.21
562	4.14
563	4.17
564	4.01
565	3.96
566	3.86
567	3.94
568	4
569	3.97
570	3.91
571	3.89
572	3.59
573	3.65
574	3.73
575	3.39
576	3.46
577	3.48
578	3.5
579	3.57
580	3.69
581	4
582	4.13
583	4.29
584	4.31
585	4.33
586	4.18
587	4.11
588	4.19
589	4.07
590	4.09
591	4.07
592	4.02
593	3.99
594	3.9
595	3.88
596	3.89
597	3.8
598	3.99
599	4.02
600	4.07
602	3.97
604	3.77
606	3.8
608	3.8
610	3.49
612	3.52
614	3.53
616	3.66
618	3.81
620	4.09
622	4.31
624	4.63
626	4.9
628	5.01
630	5.08
632	5.05
634	4.93
636	5
638	4.8
640	5.01
642	4.75
644	4.68
646	4.72
648	4.75
650	4.71
652	4.79
654	4.77
656	4.57
658	4.58
660	4.64
662	4.8
664	4.58
666	4.5
668	4.65
670	4.42
672	4.52
674	4.46
676	4.4
678	4.26
680	4.14
682	4.15
684	4.03
686	4.13
688	3.95
690	3.7
692	3.71
694	3.64
696	3.5
698	3.57
700	3.65
702	3.76
704	3.84
706	3.93
708	4.03
710	3.98
712	4.06
714	4.29
716	4.61
718	4.75
720	4.66
722	4.65
724	4.44
726	4.32
728	4.16
730	4.16
732	4.02
734	4.15
736	4.19
738	4.21
740	4.11
742	4.17
744	4.48
746	4.67
748	4.59
750	4.6
752	4.48
754	4.55
756	4.59
758	4.26
760	4.33
762	4.11
764	4.28
766	4.11
768	4.07
770	3.99
772	3.87
774	3.76
776	3.64
778	3.56
780	3.48
782	3.54
784	3.55
786	3.68
788	3.7
790	4.16
792	4.27
794	4.74
796	4.67
798	4.68
800	4.68

## Sheet: DSDP607 SST
Depth (metres composite depth)	Age (ka)	SST summer (C)	SST winter (C)
0.02	6.68959	21.7	15.1
0.05	6.89781	22.8	16
0.1	7.24484	22.6	15.8
0.12	7.38365	22.1	15.3
0.15	7.59187	23.1	16.2
0.2	7.9389	22.7	15.8
0.25	8.28594	20.8	13.9
0.3	8.63297	24.1	17.2
0.35	8.98	24.1	17
0.38	9.18822	19.5	12.7
0.4	9.32703	19	12.1
0.43	9.53525	16.7	10
0.45	9.67406	15.4	9.1
0.5	10.0211	16.2	9.8
0.55	10.3681	12.9	6.9
0.6	10.7152	11.5	6
0.62	10.854	11.3	5.3
0.65	11.0622	12.9	8.3
0.7	11.4092	11.5	6.1
0.75	11.7563	13.3	8.3
0.76	11.8257	14.4	6.7
0.8	12.1033	13.7	7.7
0.85	12.4503	16.7	10.5
0.9	12.7974	13.4	7.3
0.95	13.1444	16.8	10.5
1	13.4914	15.6	9.9
1.05	13.8342	10.9	7.7
1.1	14.1763	17	10.7
1.15	14.5184	18.3	11.7
1.2	14.8605	20.6	13.9
1.25	15.2025	15.6	9.4
1.3	15.5443	15.6	9.8
1.35	15.886	15.4	10.1
1.4	16.2278	17.5	11.2
1.45	16.5695	12.8	6.7
1.5	16.9113	14.6	8.5
1.55	17.2574	11.8	6.3
1.6	17.6115	11.6	5.5
1.65	17.9655	12.5	6.5
1.7	18.3195	12.5	6.8
1.75	18.6736	12	6.1
1.8	19.0276	12.5	6.7
1.85	19.406	12.2	5.8
1.9	19.821	10.6	4.8
1.95	20.236	12.2	4.6
2	20.651	10.8	4.5
2.05	21.0659	11.1	5.1
2.1	21.4806	11.6	5.5
2.15	21.8953	13.7	7.5
2.2	22.31	11.9	5
2.25	22.7366	14.8	8.7
2.3	23.1631	12.4	6.7
2.35	23.5897	13	6.9
2.4	24.0948	14.4	8.6
2.45	24.6921	14.6	8.9
2.5	25.2895	15	9.1
2.55	25.8868	16.7	10.3
2.6	26.4842	16.2	9.9
2.65	27.1598	16.7	10.4
2.7	27.8404	16.1	10.2
2.75	28.521	15.9	9.7
2.8	29.2016	14.8	8.9
2.85	29.8977	12.3	5.8
2.9	30.617	17.6	11.6
2.95	31.3362	19.1	12.8
3	32.0555	17.9	12.1
3.05	32.8453	17.6	11.9
3.1	33.6716	19.5	13.3
3.15	34.4978	19.6	13.1
3.2	35.6711	13.1	6.4
3.25	36.9106	14.6	8.4
3.3	38.15	14.5	8.4
3.35	39.6817	12	5.4
3.4	41.2134	11.7	5.2
3.45	42.8271	11.6	5
3.5	44.8715	12.7	6.5
3.55	46.9158	13.4	6.4
3.6	48.9245	12.9	7.2
3.65	50.9165	13.4	7.5
3.7	52.8834	14.9	9.4
3.75	54.7503	19.3	12.1
3.8	56.6173	17.4	11.3
3.85	58.4184	17.1	11.6
3.9	60.1939	17.4	11.4
3.95	61.9694	16	10.7
4	63.7449	17.5	11.5
4.05	65.6126	17	11.2
4.1	67.5034	14.2	8.9
4.15	69.3892	15.2	10.3
4.2	71.2681	15.7	10.7
4.25	73.0042	15.9	10.8
4.3	74.6083	16.3	10.7
4.35	76.2062	16.3	10.5
4.4	77.8	15.8	9.8
4.45	79.181	15.4	9.1
4.5	80.462	14.7	8.6
4.55	81.7439	17.7	12.1
4.6	83.0265	19.4	13.2
4.65	84.3087	20.9	14.2
4.7	85.5897	21.1	14.4
4.75	86.8707	19.8	13.5
4.8	88.1003	22.3	15.3
4.85	89.3216	21.3	14.6
4.9	90.4708	21.8	14.9
4.95	91.5204	23.4	16.4
5	92.57	17.9	11.9
5.05	93.6368	20	13.6
5.09	94.4903	16.2	10.6
5.13	95.3438	14.6	9.3
5.17	96.1973	15.1	9.4
5.21	97.4357	16.6	10.4
5.25	98.9587	17.3	11.3
5.29	100.482	18.8	12.4
5.34	102.385	15.1	9.4
5.38	103.927	16.5	10.6
5.42	105.572	24.5	15.9
5.46	107.217	18.5	12.6
5.5	108.944	17.8	11.6
5.54	110.884	21.2	14.6
5.58	112.824	20.5	14
5.62	115.109	23.1	16.3
5.66	117.623		14.3
5.7	120.361	25	16.9
5.74	123.566	25.1	16.8
5.78	126.683	25	17.4
5.82	128.718	20.8	13.4
5.86	130.669	17.1	10.3
5.9	131.859	15.6	7.6
5.94	133.048	8.5	5.5
5.98	134.238	12	4.7
6.02	135.368	12.1	6.2
6.06	136.319	12.2	7.4
6.1	137.27	16.8	11
6.2	139.649	15.1	10.4
6.25	140.838	16.3	11.6
6.35	143.165	19.3	12.5
6.4	144.263	14.5	9.6
6.45	145.361	18.1	12.4
6.5	146.459	16.7	11.7
6.55	147.556	19.6	13.1
6.6	148.652	15.7	10.4
6.65	149.913	12.9	7.8
6.7	151.269	12.5	7.5
6.75	152.643	12.2	6.8
6.8	154.014	12.1	6
6.85	155.391	14	7.8
6.9	156.922	13.1	7.1
6.95	158.46	13.8	7.9
7	160.058	15.1	9.1
7.05	161.656	15.8	9.9
7.1	163.26	15	9.2
7.15	164.861	18.4	12.2
7.2	166.455	18.2	12.3
7.25	168.054	16.5	11.2
7.3	169.658	16.6	10.5
7.35	171.176	12.5	7.4
7.4	172.676	15.8	9.8
7.45	174.163	14	8
7.5	175.65	14.7	9.2
7.55	177.135	14.1	8.2
7.6	178.615	17.4	11.1
7.65	180.101	18.9	12.4
7.7	181.588	17.9	11.4
7.75	183.076	17	10.9
7.8	184.565	16.6	11.2
7.85	186.057	16.1	10.8
7.9	187.548	17.6	12.5
7.95	189.039	14.1	9.7
8	190.531	15.2	10.5
8.05	192.18	14.1	9
8.1	193.847	18.8	12.8
8.15	195.513	20.3	13.9
8.2	197.18	17.2	11.9
8.25	198.996	21.7	14.8
8.3	201.196	20.6	13.5
8.35	203.391	22.7	15
8.4	205.401	19.3	12.6
8.45	207.244	20.2	13.2
8.5	209.083	20	13.1
8.55	210.916	16.5	10.3
8.6	212.818	14.4	8.5
8.65	215.004	12.8	6.8
8.7	217.318	17	11.2
8.75	220.02	16.2	10.6
8.8	222.8	18.6	12.2
8.85	225.73	19.9	13.2
8.9	228.66	19.5	13.1
8.95	231.59	20.5	13.8
9	234.53	19.2	13
9.05	237.46	19.6	12.9
9.1	240.39	20	13.4
9.15	243	15.2	9.2
9.32	248.87	14.8	8.8
9.48	252.36	15.9	10.2
9.62	255.24	17.9	11.8
9.78	258.47	17.8	12.1
9.92	261.16	16	10.5
10.08	264.07	16.3	10
10.22	266.25	18.5	12.3
10.38	268.58	14.4	8.3
10.52	270.53	18	11.6
10.59	271.51	23.9	16.4
10.76	273.89	17.7	11.6
10.89	275.71	15.9	10.4
11.03	277.67	20.5	13.8
11.18	280.27	19.7	13
11.34	282.82	20.3	13.6
11.48	286.02	20.6	14.2
11.63	289.89	16.9	10.6
11.78	293.45	17.8	11.2
12.01	298.55	19.7	12.9
12.09	300.44	18	12
12.26	305.39	18.5	12.6
12.38	309.15	21.1	14
12.53	313.88	18.1	12.1
12.68	318.61	16.7	11.4
12.76	320.745	16.4	10.7
12.84	322.88	20.6	13.4
12.98	326.58	23.6	16.4
13.13	330.33	22.4	15.2
13.28	333.49	15.9	9.6
13.51	338.23	11.7	5.4
13.59	340.29	19.9	12.3
13.76	344.98	14.3	8.7
13.88	347.553	18.5	11.8
14.03	350.77	16.6	10.2
14.18	353.32	11.9	7
14.34	356.03	10.2	4.1
14.48	358.41	16	9.9
14.63	360.96	15.7	10.2
14.7	362.15	15.6	10.2
14.78	363.5	17.9	11.5
14.86	364.86	17.4	10.8
15.01	367.63	18.6	12.3
15.09	369.24	21.1	13.3
15.26	373.26	18.4	11.2
15.38	376.14	22	14.4
15.53	380.58	20.3	13.6
15.68	385.01	18.7	12.6
15.84	389.15	18	10.8
15.98	392.13	25.5	16.9
16.14	395.54	22.6	15.2
16.2	396.81	24.8	17.1
16.28	398.52	25.9	18.3
16.5	403.13	26.8	20.2
16.58	404.8	26.3	19.1
16.65	406.595	24.8	17.8
16.75	409.16	25.6	18.7
16.89	412.79	25.6	19.5
17.03	416.43	26.6	18.9
17.18	419.65	23.6	16.7
17.33	422.77	18.9	11.8
17.4	424.16	10.4	5.8
17.64	428.73	16.4	9.8
17.7	429.88	15.6	9.7
17.78	431.4	15	8.4
17.88	433.28	11.8	6.3
18	435.536	10.3	5.6
18.08	437.04	12.3	6.5
18.15	438.205	12.1	6.3
18.25	439.87	14.2	8.1
18.39	442.39	18.4	11.2
18.53	445.49	19.4	12.3
18.68	450.27	16.6	10.3
18.83	455.52	14.6	8.2
18.98	460.504	18.3	11.3
19.14	465.82	15.7	9.3
19.22	467.65	15.2	9.8
19.34	470.1	18.3	11.1
19.49	473.15	17.2	9.6
19.63	476.27	19.7	12.8
19.65	476.92	19.2	12.4
19.8	482.51	21	13.5
19.94	489.79	19.5	13.1
20.09	498.51	22.3	15.2
20.24	508.75	22.2	13.6
20.47	524.4	19.5	13.2
20.55	529.8	17.8	11.3
20.61	533.16	14.9	8.4
20.72	539.14	19.7	11.6
20.84	544.07	19.8	13.4
20.99	549.68	20.7	13.6
21.15	556.32	21	13.6
21.22	559.624	18.4	12
21.3	563.4	18	11.5
21.44	572.92	20.3	12.9
21.59	580.14	19.4	12.9
21.74	585.61	20.1	13.4
21.85	589.165	18.8	12
21.97	593.044	18.3	11.7
22.05	595.63	18.3	11.9
22.13	598.11	21.1	14.4
22.22	600.65	19.8	13.2
22.34	602.9	20.8	14.5
22.45	604.388	20.8	14
22.55	605.74	21.1	14.8
22.63	606.57	20.6	14.1
22.72	607.43	19.6	13.5
22.8	608.1	21.3	14.6
22.93	609.18	21.9	15.3
23	609.76	22.5	15.8
23.08	610.428	22.9	16.1
23.13	610.845	22.5	15.6
23.23	611.68	21.4	14.6
23.38	612.93	21.5	14.8
23.53	614.18	22	15.1
23.68	615.43	20.5	13.8
23.75	616.013	21.3	14.5
23.83	616.68	19.3	12.6
23.94	617.595	21.6	14.7
24.05	618.51	20.4	13.6
24.13	619.17	19.3	12.6
24.3	620.79	18.3	11.6
24.43	622.23	16.9	10.5
24.58	624.037	16.9	10.2
24.73	625.843	14.8	7.9
24.88	627.65	19.9	13.3
25.03	629.78	18.4	12.1
25.18	631.91	19.8	14.1
25.33	634.04	19.1	12.3
25.55	637.24	15.1	9.7
25.63	638.54	17.7	10.9
25.8	641.56	17.1	10.7
25.93	643.964	20.8	13.4
26.08	646.738	17.3	11.5
26.23	649.512	18.6	12.9
26.38	652.286	18	11.2
26.53	655.06	20.6	12.5
26.68	658.63	18.5	10.8
26.83	662.21	18.3	10.9
27.05	668.54	15	8.5
27.13	670.92	14.4	8.2
27.3	675.941	17	10.2
27.43	679.78	17.5	11
27.58	683.05	17.1	10.3
27.73	686.09	17.6	11.2
27.88	689.13	23.6	16.8
28.03	692.17	23.6	16.9
28.18	695.21	24.8	18
28.33	698.47	22.2	15.5
28.44	700.675	25.2	18.2
28.55	702.88	24.5	17.5
28.63	704.86	24	17.1
28.8	709.07	12.5	8
28.93	712.3	6.7	0.4
29.08	716	16.5	8
29.23	719.3	14.8	7.5
29.38	722.24	19.5	10.9
29.53	725.29	18.7	10.8
29.68	728.58	17.8	11.6
29.83	731.87	17.7	11.6
30.05	736.7	20.9	14.1
30.13	738.46	19.3	12.8
30.3	742.16	16.9	10.3
30.43	744.5	18.8	11.2
30.58	747.19	15.2	8.9
30.73	750.15	18.7	10.8
30.88	754.26	17.7	10.6
31.03	758.48	19.4	12.1
31.18	763.6	21.1	12
31.26	766.43	17.8	11.1
31.42	770.764	18.1	11.6
31.56	774.556	22.2	15.1
31.72	778.891	20.4	13.4
31.86	782.683	24	16.8
32.01	786.746	15.7	10.5
32.16	790.809	9.1	4.1
32.32	795.144	19.7	10.2
32.46	798.936	17.8	10.7
32.62	803.27	16.9	9.8

## Sheet: DSDP607 BWT
Depth (metres composite depth)	Age (ka)	BWT (C)	Note: Chain 82-23-24 piston core to 3.25m depth
0.265	10.37	2.74303
0.4	20	-1.04088
0.45	22.03	0.849943
0.5	24.06	0.958439
0.55	26.09	-0.3454
0.6	28.12	0.706827
0.75	34.2	-0.953026
0.8	36.23	0.0345984
0.85	38.26	-0.038907
0.9	40.29	-0.148165
0.95	42.32	-0.35514
1	44.35	-0.129537
1.05	46.38	-0.251175
1.1	48.41	0.108913
1.15	50.44	-0.368872
1.25	54.49	-1.4696
1.3	56.52	0.717287
1.4	60.58	-0.665517
1.45	62.61	0.46233
1.5	64.64	0.219023
1.55	66.67	0.0222871
1.6	68.7	0.292351
1.65	70.73	-0.540272
1.7	72.75	-0.45
1.75	74.78	-0.111235
1.8	76.81	0.582283
1.9	80.87	1.23213
1.95	82.9	0.702487
2	85.58	0.730086
2.05	88.26	1.4584
2.1	90.94	1.10749
2.15	93.62	2.6561
2.2	96.3	1.19498
2.25	98.98	1.16504
2.35	104.34	2.86051
2.4	107.02	2.44075
2.45	109.7	2.79734
2.5	111.92	3.1343
2.6	116.35	3.572
2.65	118.57	2.31927
2.7	120.78	1.62297
2.85	127.86	2.54215
2.9	130.29	1.22677
2.95	132.71	2.34731
3	135.14	1.17611
3.1	140	1.81542
3.15	142.26	0.232955
3.2	144.52	-0.232001
3.25	146.77	-0.444156
6.77971	153.46	-0.910487
6.82971	154.83	-1.4865
6.90971	157.22	0.718728
7.05971	161.97	-0.824508
7.35971	171.47	-1.10245
7.42971	173.56	-1.40641
7.63	179.51	-0.362809
7.75	183.08	0.563717
7.9	187.55	1.89046
8.03	191.51	2.15807
8.10971	194.17	1.36614
8.2	197.18	0.00826347
8.27971	200.3	2.18297
8.40971	205.76	0.886009
8.55971	211.29	0.413824
8.85971	226.3	1.85779
9.00971	235.1	2.01727
9.15971	243.34	1.32999
9.30971	248.51	2.9467
9.61971	255.23	2.99975
9.76971	258.26	1.97205
10.0697	263.88	-1.40787
10.4947	270.18	0.295482
10.6747	272.7	0.958699
10.8047	274.52	-0.525701
11.0047	277.32	1.06586
11.1247	279.31	1.80008
11.2847	281.94	2.7696
11.4347	284.99	2.56387
11.7247	292.14	-0.804501
12.0247	298.9	-1.47571
12.1247	301.45	-0.474449
12.4947	312.77	-0.438534
12.6447	317.5	0.956218
12.9347	325.38	2.94686
13.0747	328.95	0.976439
13.1947	331.69	2.13578
13.6847	342.9	-0.0745751
13.8347	346.58	-0.642944
13.9947	350.01	0.458063
14.1547	352.89	0.925996
14.4347	357.64	1.91599
14.5947	360.36	-1.50031
14.7147	362.4	-0.27158
14.8147	364.09	-0.776017
15.0547	368.53	1.17421
15.1947	371.72	0.250999
15.3247	374.81	-0.692433
15.4647	378.65	0.958695
15.6147	383.08	0.462153
15.7347	386.43	1.55233
15.9547	391.59	-0.250575
16.0747	394.15	1.21397
16.2147	397.12	0.65239
16.3347	399.67	1.15501
16.4547	402.18	1.5041
16.6247	405.95	1.64188
16.8247	411.1	2.52239
17.0547	416.96	3.30179
17.2147	420.37	3.53615
17.3147	422.45	2.81509
17.5947	427.87	0.577835
17.7347	430.54	0.564528
17.8847	433.37	-0.663967
18.0547	436.57	-0.0748291
18.2047	439.12	1.12342
18.3547	441.76	0.0161928
18.5047	444.93	0.557623
18.6297	448.67	-0.914992
18.7847	453.94	-0.798502
18.9247	458.67	0.020853
19.0147	461.66	0.143982
19.1347	465.65	0.448331
19.1548	466.16	-0.489785
19.4548	472.43	-1.58631
19.5948	475.48	0.24604
19.7548	480.82	0.257705
19.9048	487.96	0.0694514
20.0648	497.04	0.367591
20.2148	507.03	0.671133
20.5148	527.42	1.54695
20.6648	536.14	0.222991
20.9648	548.74	0.879001
21.2548	561.27	0.41585
21.4048	570.52	0.318367
21.5548	578.44	0.925139
21.7048	584.33	1.98181
21.8348	588.67	2.22814
21.8648	589.64	2.63834
22.1348	598.24	2.73591
22.1548	598.81	2.08024
22.2848	601.86	0.477914
22.3048	602.24	2.52903
22.3848	603.51	3.20248
22.4348	604.18	1.25977
22.5948	606.2	1.28245
22.7448	607.64	2.00102
23.0448	610.13	4.00505
23.2048	611.47	2.65466
23.3548	612.72	1.80299
23.5048	613.97	2.44374
23.6398	615.09	2.41287
23.7998	616.43	0.841099
24.0998	618.92	4.40795
24.2298	620.12	3.12993
24.6898	625.36	3.33194
24.8298	627.05	0.989362
25.1398	631.34	0.172945
25.2898	633.47	0.791874
25.5898	637.89	-0.705317
25.9098	643.59	-0.458016
26.0598	646.36	-0.768487
26.1998	648.95	0.410412
26.6398	657.67	-0.171646
26.7898	661.25	-1.00406
27.1098	670.32	-0.351301
27.2498	674.46	-0.199071
27.5398	682.17	0.59922
27.6898	685.28	0.555014
27.8398	688.32	1.06683
27.9898	691.36	2.53096
28.1398	694.4	2.72874
28.2898	697.6	3.51892
28.5798	703.62	1.79184
28.7298	707.33	3.62689
28.8798	711.05	-0.340221
29.0398	715.01	-0.293621
29.1998	718.64	-0.0235063
29.4898	724.47	0.582559
29.6448	727.81	1.90663
29.7998	731.21	2.31812
29.9498	734.5	2.32225
30.0998	737.8	1.48126
30.2498	741.07	1.8766
30.5598	746.83	-0.993834
30.8498	753.43	-0.252136
30.9898	757.35	0.161691
31.1398	762.23	-0.071051
31.58	775.1	1.86356
31.82	781.6	3.00099
31.9912	786.24	3.34801
32.1113	789.49	2.37575
32.2812	794.09	-0.339981
32.5883	802.41	0.549074

## Sheet: ODP646 d18O
Depth (metres composite depth)	Orig age (ka)	LR04 age (ka)	d18O planktonic
0	0	0	2.24
0.2	1.3909	1.112	2.13
0.4	3.33076	2.664	2.49
0.6	5.27063	4.216	2.01
0.8	7.21049	5.768	2.59
1	9.15035	7.32	1.8
1.2	11.0902	8.872	2.4
1.45	13.0301	10.633	2.7
1.6	14.9699	12.573	3.32
1.95	16.9098	14.513	4.3
2.15	18.8497	16.453	3.55
2.3	20.7895	18.393	3.95
2.5	22.6366	20.243	4.42
2.7	24.4678	22.073	4.15
2.95	26.2991	23.903	4.08
3.15	28.0999	25.703	3.93
3.4	29.7845	27.383	3.45
3.55	31.4691	29.073	3.6
3.75	33.1536	30.753	3.72
4	34.7167	32.323	3.75
4.2	36.1844	33.783	3.65
4.3	37.6521	35.253	3.7
4.48	39.1199	36.723	3.45
4.7	40.4078	38.013	3.67
4.9	41.6788	39.283	3.77
5.14	42.9498	40.553	3.41
5.35	44.186	41.793	3.32
5.6	45.3272	42.933	3.4
5.75	46.4685	44.073	3.72
5.95	47.6097	45.213	3.68
6.17	48.8779	46.483	3.75
6.38	50.2234	47.823	3.82
6.55	51.569	49.173	3.4
6.75	52.9145	50.513	3.55
6.95	56.747	54.353	3.45
7.12	60.6438	58.243	4.04
7.32	64.5406	62.143	3.41
7.53	68.6685	66.273	4.6
7.71	73.2692	70.873	3.46
7.9	77.8699	75.473	3.49
8.1	82.4705	80.073	3.39
8.32	87.0342	84.633	3.41
8.5	91.5805	89.183	3.57
8.55	96.1268	93.733	3.31
8.71	100.667	98.273	2.93
8.92	105.028	102.633	2.86
9.2	109.39	106.993	2.38
9.4	113.752	111.353	2.98
9.6	117.389	114.993	2.28
9.8	119.886	117.493	2.08
10.01	122.384	119.983	2.03
10.21	124.882	122.483	2.29
10.4	126.559	124.163	2.44
10.54	127.951	125.553	2.57
10.72	129.343	126.943	1.9
10.91	130.753	128.353	3.51
11.12	132.337	129.943	3.57
11.32	133.921	131.523	3.97
11.51	135.505	133.103	2.87
11.72	137.155	134.753	4.49
11.91	138.887	136.493	4.44
12.1	140.619	138.223	4.34
12.3	142.35	139.953	4.77
12.51	144.18	141.783	4.26
12.67	146.034	143.633	3.99
12.8	147.887	145.493	4.09
13	149.757	147.363	4.24
13.15	151.712	149.313	4.14
13.3	153.667	151.273	4.09
13.45	155.622	153.223	4.38
13.63	157.621	155.223	4.08
13.85	159.661	157.263	4.19
14.1	161.701	159.303	4.18
14.3	163.742	161.343	4.19
14.5	165.845	163.443	3.85
14.67	167.957	165.563	3.57
14.8	170.07	167.673	3.55
14.95	172.196	169.803	3.45
15.1	174.371	171.973	3.15
15.33	176.546	174.153	3.19
15.6	178.72	176.323	3.08
15.8	180.926	178.533	3.74
15.99	183.154	180.753	3.91
16.15	185.382	182.983	3.92
16.3	187.61	185.213	4.05
16.42	189.908	187.513	3.67
16.6	192.211	189.813	2.43
16.78	194.515	192.113	2.89
17.02	196.861	194.463	2.74
17.3	199.32	196.923	2.57
17.77	201.778	199.383	2.89
17.97	204.237	201.843	2.86
18.1	206.756	204.363	2.94
18.3	209.311	206.913	3.02
18.53	211.865	209.473	3.26
18.65	214.42	212.023	3.39
18.8	216.996	214.603	3.49
19.1	219.573	217.173	3.54
19.31	222.15	219.753	3.57
19.5	224.708	222.313	3.61
19.75	227.229	224.833	3.56
19.92	229.751	227.353	3.35
20.1	232.273	229.873	3.03
20.31	234.702	232.303	2.84
20.5	237.09	234.416	2.38
20.69	239.478	236.328	2.69
20.9	241.858	238.232	3
21.02	244.056	239.992	3.25
21.21	246.255	241.752	3.64
21.4	248.454	243.504	4.09
21.8	252.621	246.84	4.29
22.01	254.654	248.464	4.29
22.4	258.62	251.64	4.7
22.6	260.518	253.329	3.77
22.84	262.416	255.229	4.04
23.01	264.304	257.466	4.23
23.18	266.107	259.729	4.24
23.32	267.91	261.979	4.27
23.5	269.713	264.229	4.05
23.7	271.497	266.466	3.42
23.91	273.259	268.666	4.43
23.99	275.021	270.866	3.71
24.2	276.783	273.066	3.84
24.49	278.574	275.304	3.85
24.71	280.373	277.554	4.45
24.93	282.172	279.804	4.14
25.35	283.995	282.091	3.93
25.52	285.943	284.516	3.88
25.73	287.891	286.954	3.8
25.99	289.84	289.391	3.59
26.2	291.955	291.95	3.91
26.35	294.225	294.22	3.96
26.62	296.494	296.49	3.34
26.8	298.764	298.76	3.14
26.97	301.455	301.45	2.8
27.13	304.207	304.21	2.32
27.29	306.959	306.96	2.51
27.49	309.748	309.75	2.89
27.62	312.665	312.67	2.58
27.89	315.582	315.58	2.99
28.1	318.499	318.5	2.67
28.28	321.393	321.39	2.62
28.5	324.269	324.27	2.24
28.71	327.145	327.14	2.41
28.92	330.021	330.02	2.36
29.19	332.796	332.8	2.31
29.4	335.565	335.56	2.24
29.59	338.333	338.33	3.25
29.8	341.067	341.07	4.04
30	343.717	343.72	3.94
30.2	346.366	346.37	3.71
30.41	349.016	349.02	3.8
30.7	351.619	351.62	3.97
30.9	354.197	354.2	4.08
31.09	356.775	356.78	4.1
31.29	359.353	359.35	3.99
31.49	361.963	361.96	3.26
31.69	364.573	364.57	3.05
31.88	367.184	367.18	3.26
32.2	369.879	369.572	3.82
32.4	372.732	371.852	3.1
32.7	375.586	374.14	2.68
32.8	378.439	376.42	2.55
32.99	381.484	378.852	2.75
33.2	384.61	381.356	2.13
33.37	387.736	383.86	2.26
33.57	390.869	386.364	1.88
33.79	394.128	388.972	1.87
33.92	397.387	391.58	1.85
34.18	400.646	394.188	2.57
34.3	403.889	396.78	2.42
34.45	407.107	399.356	1.85
34.68	410.326	401.932	2.5
34.88	413.545	404.5	2.43
35.08	416.553	406.908	2.61
35.29	419.496	409.268	2.4
35.44	422.44	411.62	3
35.65	425.322	413.924	2.79
35.8	427.743	415.86	2.8
35.97	430.164	417.796	2.75
36.2	432.585	419.732	3.59
36.4	434.93	421.612	3.55
36.58	437.19	423.42	3.74
36.78	439.449	425.228	3.86
36.94	441.709	427.036	3.97
37.17	443.935	428.812	4.14
37.28	446.153	430.588	4.26
37.48	448.371	432.39	4.5
37.69	450.586	434.998	4.5
37.9	452.788	437.748	4.26
38.05	454.99	440.498	3.98
38.24	457.191	443.248	3.57
38.47	459.388	445.998	3.88
38.66	461.581	448.735	4.2
38.8	463.775	451.473	3.83
38.98	465.968	454.223	4
39.3	468.157	456.96	3.57
39.5	470.345	459.685	2.75
39.7	472.533	462.423	3.82
39.91	474.72	465.16	3.07
40.1	476.9	467.885	3.87
40.33	479.08	470.61	2.24
40.5	481.26	473.27	1.96
40.7	483.419	475.43	2.14
40.8	485.563	477.57	1.79
41	487.707	479.72	2.79
41.2	489.851	481.86	1.79
41.4	491.958	483.97	2.12
41.6	494.063	486.07	2.86
41.79	496.168	488.18	1.91
41.99	498.263	490.27	2.75
42.2	500.331	492.34	3.79
42.3	502.4	494.41	3.52
42.44	504.468	496.48	3.82
42.79	506.517	498.53	3.45
42.89	508.555	500.56	3.57
43.1	510.592	502.6	3.78
43.3	512.63	504.64	3.57
43.49	514.653	506.66	3.72
43.7	516.676	508.69	3.46
43.8	518.698	510.71	3.73
44	520.741	512.75	2.98
44.2	522.817	514.83	3.32
44.4	524.894	516.9	3.01
44.61	526.97	518.98	2.84
44.75	529.526	521.54	2.74
44.98	532.276	524.29	3.03
45.21	535.026	527.04	3.69
45.3	537.818	529.83	3.8
45.5	541.213	533.22	4.13
45.7	544.607	536.62	4.57
45.9	548.002	540.01	3.64
46.08	551.369	543.38	3.87
46.3	554.699	546.71	4.41
46.9	561.357	553.37	3.09
47.1	564.601	556.61	2.7
47.3	567.82	559.83	2.99
47.5	571.039	562.62	2.88
47.7	574.251	565.188	2.62
47.89	577.407	567.716	2.46
48.02	580.563	570.236	2.07
48.24	583.72	572.764	2.45
48.4	586.841	575.26	2.11
48.56	593.007	580.196	2.06
50	602.096	588.517	3.44
50.2	605.092	591.507	3.52
50.4	610.96	597.377	3.12
50.59	613.852	600.267	2.77
50.8	616.743	603.157	2.74
51	619.54	605.957	2.91
51.21	622.256	608.677	3.57
51.39	624.973	611.387	3.71
51.5	627.689	614.107	3.41
51.7	630.251	616.667	3.59
51.9	632.795	619.207	3.9
52.1	635.339	621.991	4.34
52.29	637.869	625.153	4.04
52.5	640.357	628.265	4.7
52.78	642.845	631.366	4.51
52.9	645.333	634.478	4.23
53.04	647.806	637.578	4.21
53.2	650.27	640.653	4.34
53.6	652.734	643.728	4.1
53.8	655.198	646.816	4.09
54	657.651	649.878	3.74
54.2	660.102	652.94	3.7
54.38	662.554	656.003	4.06
54.7	667.448	662.128	3.94
55.08	669.893	665.178	3.64
55.3	672.337	668.241	3.6
55.5	674.778	671.291	3.12
55.7	677.217	674.34	2.74
55.87	679.655	677.39	2.5
56.04	682.094	680.428	3.88
56.18	684.522	683.466	2.84
56.6	686.951	686.503	2.5
56.8	689.379	689.38	2.66
57	691.8	691.8	2.59
57.2	694.21	694.21	2.5
57.4	696.619	696.62	2.74
57.5	699.029	699.03	2.44
57.59	701.411	701.41	2.29
58.08	703.783	703.78	2.71
58.29	706.154	706.15	3.1
58.68	710.807	710.81	2.64
58.78	713.094	713.09	3.14
59	715.381	715.38	3.34
59.19	717.622	717.62	3.66
59.6	719.803	719.8	3.59
59.85	721.983	721.98	3.55
60.03	724.163	724.16	3.48
60.2	726.264	726.26	3.33
61.2	736.463	736.46	3.45
62.01	744.25	744.25	3.85
62.23	748.133	748.13	3.92
62.51	750.101	750.1	3.46
62.61	752.069	752.07	3.4
62.83	754.276	754.28	3.25
63	757.458	757.46	3.49
63.25	760.639	760.64	3.92
63.44	763.821	763.82	2.64
63.69	768.035	768.04	2.56
63.83	773.092	773.09	2.41
64.14	778.149	778.15	1.64
64.38	783.206	783.21	2.68
64.5	786.832	786.83	2.79
64.74	790.307	790.31	3.66
64.95	793.782	793.78	3.23
65.15	796.805	796.8	4.27
65.35	798.527	798.53	4.19
65.53	800.248	800.25	3.25

## Sheet: ODP677 d18Op
Depth (m)	Orig age (ka)	Interpolated age on LR04 (ka)	d18O planktonic
0.4	6	4	-1.75986
0.5	8	5.01896	-0.763435
0.6	9	7.52845	0.395672
0.68	11	12.4199	0.253325
0.8	12	14.1951	0.710868
0.9	14	17.0591	0.985393
0.98	15	18.3975	1.35143
1.1	17	20.9481	1.83947
1.2	19	23.3713	1.41243
1.3	21	25.3789	1.81914
1.4	22	26.3827	1.47344
1.5	24	28.3903	1.27009
1.6	25	29.3941	1.18875
1.7	27	31.4016	1.0464
1.8	29	33.4092	1.49377
1.9	30	34.413	0.782041
2	32	36.4206	0.253325
2.1	34	38.4282	0.690532
2.2	35	39.432	0.568521
2.3	37	41.4396	0.131314
2.4	38	42.4434	0.19232
2.47	39	43.4472	0.477013
2.58	41	45.4547	0.23299
2.7	43	47.4623	0.375337
2.8	45	49.4699	0.00930278
2.9	46	50.4737	0.395672
3.03	49	52.4813	-0.397401
3.1	50	54.4889	-0.112708
3.2	51	55.4927	-0.336396
3.3	53	57.5003	-0.23472
3.4	55	59.5078	-0.255055
3.5	56	60.5116	0.456677
3.6	58	62.5192	0.273661
3.7	59	63.523	0.293996
3.8	61	65.5306	0.314331
3.9	63	67.5382	0.304163
3.985	65	69.55	0.456677
4.08	67	72.0342	-0.0313676
4.1	68	72.5572	0.293996
4.2	70	74.5647	-0.52958
4.3	72	76.1851	-0.651592
4.4	74	77.7911	-0.621089
4.5	76	79.3972	-0.966787
4.6	78	81.0033	-0.936285
4.7	81	83.4124	-1.04813
4.78	82	84.2282	-0.458407
4.8	83	84.7301	-0.326228
4.9	85	87.2396	0.029638
4.98	87	89.6487	-0.560083
5	88	90.251	-0.621089
5.1	91	93.2624	-0.78377
5.13	92	94.1808	-0.468575
5.2	94	96.3237	-0.939674
5.3	97	100.088	-1.1498
5.4	100	103.852	-1.1498
5.5	103	107.616	-1.00746
5.6	107	112.635	-0.837998
5.7	110	116.304	-0.961704
5.8	113	118.955	-0.885447
5.9	116	121.364	-1.02779
6	119	123.773	-1.1498
6.1	122	126.182	-2.00388
6.2	125	128.591	-0.70243
6.28	128	131.001	0.029638
6.4	132	134.213	1.71746
6.5	136	137.425	1.67679
6.6	139	139.834	1.59545
6.7	143	143.046	1.59545
6.8	146	145.455	1.61578
6.9	150	148.667	1.43277
7	153	151.076	1.16841
7.1	157	154.289	0.822711
7.2	160	156.698	0.822711
7.3	164	159.91	1.59545
7.4	167	162.319	0.985393
7.5	171	165.531	1.53444
7.6	174	167.94	1.31076
7.7	178	171.152	1.53444
7.78	180	173.265	1.35143
7.9	185	179.539	1.14807
7.93	186	180.794	1.0464
8	188	183.303	1.22942
8.05	190	185.812	1.00573
8.1	192	188.322	0.436342
8.17	194	190.832	-0.926117
8.43	200	198.36	-0.580418
8.54	202	200.87	-0.824441
8.74	207	207.143	-0.265223
8.84	209	209.653	-0.499077
8.95	212	212.939	-0.499077
9.05	214	215.927	-1.47517
9.15	216	218.436	-0.0517029
9.26	218	220.485	0.334666
9.36	220	222.348	0.416007
9.45	222	223.929	0.395672
9.55	224	225.685	0.639694
9.68	227	227.969	0.924387
10.15	237	238.037	-0.722765
10.24	239	240.742	-0.539748
10.34	242	243.746	0.253325
10.45	245	247.052	1.35143
10.54	247	249.06	0.843046
10.64	250	252.071	1.1074
10.74	252	254.079	1.1074
10.84	255	257.09	1.1074
10.94	258	260.102	0.904052
11.03	260	262.109	0.74137
11.17	264	266.125	1.06673
11.25	266	268.132	0.74137
11.35	268	270.14	1.3921
11.44	271	272.517	0.66003
11.54	273	275.159	0.578689
11.64	276	277.922	0.619359
11.74	279	280.684	0.517683
11.95	284	284.9	-0.356731
12.02	286	286.305	-1.67852
12.14	290	289.517	-1.23115
12.24	293	291.926	-0.0313676
12.36	297	295.139	-0.0720381
12.42	298	295.942	-0.112708
12.54	302	299.154	-0.539748
12.65	305	301.563	-0.722765
12.74	307	303.169	-0.641424
12.85	310	305.947	-0.651592
12.93	312	308.124	-0.7431
13.04	315	311.888	-0.987123
13.14	318	315.652	-1.23115
13.24	321	319.416	-1.45483
13.34	324	323.181	-0.946452
13.45	327	326.945	-1.59718
13.54	329	329.454	-2.41059
13.64	331	331.964	-1.67852
13.74	333	334.473	0.456677
13.84	335	336.983	0.883717
13.94	337	339.401	2.00215
14.04	339	341.094	1.63612
14.17	343	344.306	1.59545
14.26	345	345.912	0.924387
14.35	348	348.321	0.293996
14.43	350	350.069	1.18875
14.55	354	354.084	0.314331
14.6	355	355.088	1.24975
14.65	357	356.594	1.08707
14.7	358	358.099	0.293996
14.77	360	360.107	0.782041
14.8	361	361.11	0.782041
14.9	364	364.122	1.49377
14.95	365	365.126	0.00930278
15	367	367.133	0.0906436
15.05	368	368.137	0.110979
15.1	369	369.141	0.029638
15.14	371	371.148	0.416007
15.2	372	372.152	-0.417737
15.25	374	374.16	0.497348
15.3	375	375.163	-0.133044
15.35	377	377.171	0.436342
15.4	378	378.175	-0.214385
15.45	379	379.68	0.110979
15.5	381	381.186	-0.397401
15.55	382	382.19	-0.966787
15.6	384	384.198	-0.478742
15.67	386	386.205	0.0499732
15.7	387	387.209	-0.682094
15.75	388	388.213	-0.641424
15.78	389	389.217	-1.19047
15.85	391	391.224	-0.905782
15.9	392	392.228	-1.35316
15.93	393	393.232	-0.987123
16	395	395.239	-1.71919
16.05	397	397.122	-1.75986
16.08	398	398.251	-1.94288
16.14	399	399.255	-2.28858
16.24	402	402.788	-2.32925
16.34	405	405.932	-2.65461
16.45	407	409.39	-2.08522
16.54	409	412.263	-2.00388
16.64	412	417.213	-1.37349
16.74	414	420.559	-0.661759
16.84	416	423.905	-0.336396
16.93	418	427.251	1.71746
17.03	420	430.597	1.4531
17.35	427	440.509	1.81914
17.45	429	443.646	1.47344
17.55	432	446.783	0.904052
17.65	434	449.292	1.22942
17.75	437	453.056	0.985393
17.85	439	455.566	1.3921
17.92	441	458.075	0.761706
18.05	444	461.099	0.517683
18.15	447	464.028	0.497348
18.23	449	465.51	0.558353
18.35	452	467.734	-0.173714
18.41	453	468.846	0.00930278
18.45	454	469.649	-0.0923733
18.55	457	471.932	0.253325
18.65	459	473.438	-0.255055
18.75	463	476.449	0.0601408
18.85	466	478.708	0.365169
18.95	470	481.719	-0.133044
19.05	474	484.731	-1.09897
19.15	477	486.989	-0.753268
19.25	481	490.001	-1.40399
19.35	484	492.448	-1.07863
19.42	487	494.16	-0.763435
19.55	491	497.341	-0.356731
19.65	494	499.788	-0.570251
19.73	497	502.046	-0.326228
19.85	501	505.058	-0.834608
19.95	503	506.563	-0.539748
20.05	505	508.116	-0.295725
20.15	507	509.669	-0.356731
20.25	509	511.275	0.110979
20.35	512	513.684	0.375337
20.45	514	515.485	0.0703084
20.55	517	518.496	0.029638
20.65	519	520.504	-0.0923733
20.75	521	522.511	-0.153379
20.84	524	525.523	-0.682094
20.92	526	527.214	-0.560083
21.03	528	529.538	-0.336396
21.14	531	532.444	-0.336396
21.22	533	534.557	0.131314
21.34	537	538.572	0.517683
21.45	540	541.583	-0.133044
21.55	543	544.595	0.0906436
21.65	546	547.606	-0.0110324
21.75	550	552.562	-0.641424
21.85	553	556.326	-0.397401
21.95	556	560.09	-0.621089
22.05	559	563.854	-1.61751
22.15	562	567.618	-1.23115
22.25	565	570.219	-1.7802
22.35	568	572.628	-1.1498
22.42	571	575.038	-1.63785
22.55	575	578.25	-1.71919
22.6	578	580.659	-0.194049
22.64	579	581.525	-0.621089
22.7	582	584.537	-0.133044
22.75	583	585.54	-0.397401
22.79	584	586.544	-0.153379
22.85	586	588.552	-0.316061
22.9	587	589.556	-0.885446
23.1	591	593.571	-0.7431
23.2	594	593.571	-0.946452
23.25	595	597.586	-1.0888
23.3	596	598.59	-1.19047
23.35	598	600.597	-0.814273
23.4	599	601.492	-1.1498
23.45	601	603.099	-0.661759
23.5	602	603.902	-0.600754
23.55	604	605.508	-0.661759
23.6	606	607.114	-0.70243
23.65	608	608.72	-0.875279
23.75	612	612.268	-1.53617
23.8	614	614.276	-1.17014
23.85	616	616.284	-1.41416
23.91	617	617.681	-1.25656
23.95	618	618.612	-0.865111
24	619	619.776	-0.173714
24.05	620	620.94	0.416007
24.125	621	622.601	0.904052
24.22	623	624.705	1.92081
24.35	625	627.214	2.03266
24.45	627	630.351	2.1445
24.55	630	633.488	1.4531
24.65	633	637.252	1.66662
24.75	635	639.326	1.65646
24.85	638	642.337	1.62595
24.95	641	645.348	1.61578
25.05	643	647.356	0.761706
25.15	646	650.367	1.17858
25.25	649	653.379	1.53444
25.35	651	655.386	1.09724
25.42	653	657.394	1.31076
25.55	656	660.405	1.51411
25.645	659	660.405	1.20908
25.73	661	665.424	0.646473
25.84	664	668.436	0.293996
25.94	667	671.447	0.7007
26.04	669	673.455	0.029638
26.14	672	676.466	-0.214385
26.25	675	679.477	0.0906436
26.35	678	682.489	-0.122876
26.45	680	684.496	-0.600754
26.55	683	687.508	-0.915949
26.6	684	688.511	-0.722765
26.64	685	689.515	-1.09897
26.7	687	691.523	-1.39383
26.74	688	692.527	-1.31249
26.8	690	694.334	-1.19047
26.84	691	695.538	-0.875279
26.9	692	696.542	-0.966787
27	695	699.553	-0.560083
27.1	698	702.565	-0.499077
27.2	701	705.576	-0.0313676
27.3	703	707.24	0.355001
27.4	706	709.649	-0.316061
27.5	709	712.058	-0.478742
27.6	712	714.467	-0.173714
27.7	714	716.073	1.27009
27.8	717	718.482	1.27009
27.9	719	720.089	1.24975
28	722	722.498	0.761706
28.06	723	723.462	0.883717
28.1	724	724.104	0.843046
28.14	725	724.907	0.497348
28.2	727	726.513	0.375337
28.24	728	727.316	0.151649
28.3	729	728.119	0.131314
28.34	731	729.725	-0.133044
28.405	732	731.215	-0.102541
28.77	742	739.585	0.761706
28.85	744	741.593	0.599024
28.95	746	743.601	0.843046
29.05	749	746.612	0.802376
29.12	750	747.616	1.12774
29.25	754	751.631	0.517683
29.35	756	753.639	0.436342
29.46	759	756.65	0.578689
29.55	761	758.657	0.436342
29.65	764	761.669	-0.0720381
29.75	767	764.68	0.0906436
29.85	769	766.688	-0.78377
29.94	771	768.695	-0.438072
30.05	774	771.707	-0.844776
30.16	777	774.718	-0.7431
30.24	779	776.726	-0.722765
30.31	781	778.733	-0.78377
30.43	784	781.745	-1.53617
30.55	786	783.752	-0.560083
30.65	788	785.76	-0.23472
30.74	790	787.767	0.456677
30.85	792	789.775	1.41243

[truncated: 27 more sheets: ODP677 d18Ob, ODP722 SST, ODP806b SST, ODP806b d18O, ODP846 d18O, ODP846 SST, ODP925 d18O, ODP980 d18O, ODP982b, ODP982 p, ODP982 SST, ODP983 b, ODP1020 SST, ODP1090 SST, ODP1090 d18Ob, ODP1090 d18Op, ODP1123 d18Ob, ODP1123 SST, ODP1143 d18O b, ODP 1146 d18O b …]
